# Supplementary material for: Merging photoredox with copper catalysis: decarboxylative difluoroacetylation of α,β-unsaturated carboxylic acids with ICF2CO2Et
Source: Royal Society of Chemistry journal article supplement (doi:10.1039/c6cc06284a), 2016-01-01

## Supporting Information

### **Merging Visible-Light Photocatalysis and Copper Catalysis in the decarboxylative difluoroalkylation of $\alpha$ , $\beta$ -unsaturated carboxylic acids with $\text{ICF}_2\text{CO}_2\text{Et}$**

Heng-Rui Zhang, Dao-Qian Chen, Ya-Ping Han, Yi-Feng Qiu, Dong-Po Jin, Xue-Yuan Liu\*

**State Key Laboratory of Applied Organic Chemistry, Lanzhou University,  
Lanzhou730000, People's Republic of China**

[liuxuey@lzu.edu.cn](mailto:liuxuey@lzu.edu.cn)

## Table of Contents

|                                                                                                                                                                   |     |
|-------------------------------------------------------------------------------------------------------------------------------------------------------------------|-----|
| 1, General Remarks .....                                                                                                                                          | S1  |
| 2, Devices for the photocatalytic reactions.....                                                                                                                  | S1  |
| 3, General Procedure for the decarboxylative difluoroalkylation of $\alpha$ , $\beta$ -unsaturated carboxylic acids with ICF <sub>2</sub> CO <sub>2</sub> Et..... | S1  |
| 4, Preparation of Starting Materials.....                                                                                                                         | S2  |
| 5, Characterization data of <b>3a–3af</b> .....                                                                                                                   | S3  |
| <sup>1</sup> H NMR and <sup>13</sup> C NMR spectra for compounds <b>3a–3af</b> .....                                                                              | S3  |
| <sup>1</sup> H NMR and <sup>13</sup> C NMR Spectra of the Products .....                                                                                          | S17 |

## 1, General Remarks

Column chromatography was carried out on silica gel.  $^1\text{H}$  NMR spectra were recorded on 400 MHz in  $\text{CDCl}_3$ .  $^{13}\text{C}$  NMR spectra were recorded on 100 MHz in  $\text{CDCl}_3$ . Chemical shifts (ppm) were recorded with tetramethylsilane (TMS) as the internal reference standard. Multiplicities are given as: s (singlet), d (doublet), t (triplet), dd (doublet of doublets), dt (doublet of triplets), q (quartet) or m (multiplet). All new compounds were further characterized by HRMS (high resolution mass spectra). Copies of their  $^1\text{H}$  NMR and  $^{13}\text{C}$  NMR spectra are provided in the Supporting Information. Solvents were dried under standard method. Commercially available reagents were used with further purification.

## 2, Devices for the photocatalytic reactions

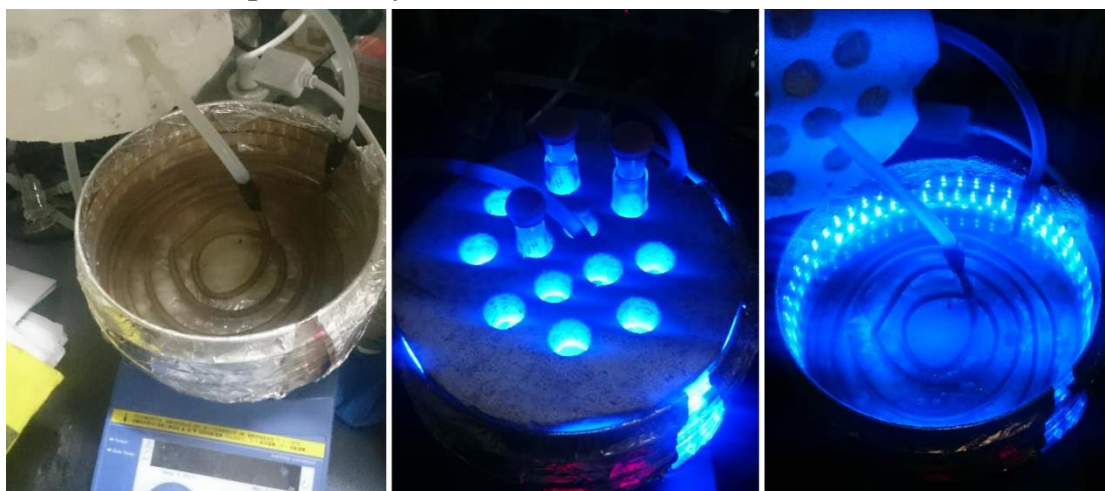

Figure 1. Devices for the photocatalytic reactions

## 3, General Procedure for the decarboxylative difluoroalkylation of $\alpha$ , $\beta$ -unsaturated carboxylic acids with $\text{ICF}_2\text{CO}_2\text{Et}$

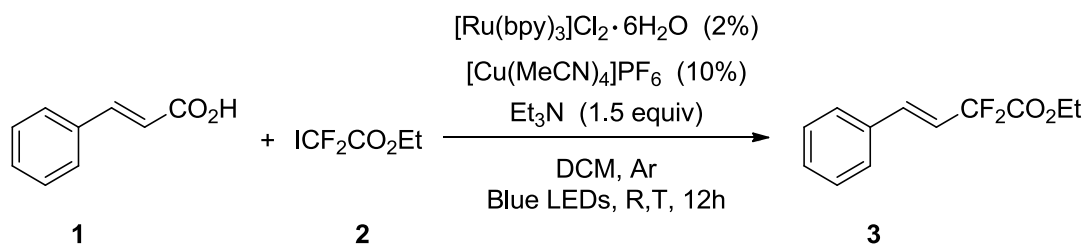

To a 10 mL of tube were added  $\alpha,\beta$ -unsaturated carboxylic acid **1** (0.15 mmol),  $[\text{Cu}(\text{MeCN})_4]\text{PF}_6$  (10 mol %, 0.015 mmol, 5.5 mg) and  $[\text{Ru}(\text{bpy})_3]\text{Cl}_2 \cdot 6\text{H}_2\text{O}$  (2 mol %, 2.2 mg) under air, The mixture was evacuated and backfilled with Ar (3 times). Ethyl

iododifluoroacetate **2** (1.5 equiv, 0.225 mmol, 56.2 mg), Et<sub>3</sub>N (1.5 equiv, 0.225 mmol, 22.7 mg), and dichloromethane (1.5 mL) were added successively. The mixture was stirred at room temperature for 12 hours while irradiated by blue LED strip ( $\lambda = 450 \pm 15$  nm, 3W electrical power). The reaction was monitored by TLC. The mixture was diluted with EtOAc, and then filtered through a pad of silica gel. The filtrate was concentrated under vacuum and purified by flash column chromatography on silica gel to give product **3**.

#### **4, Preparation of Starting Materials**

All substrates were either purchased and used from commercial suppliers directly.

## 5, Characterization data of 3a–3af

### <sup>1</sup>H NMR and <sup>13</sup>C NMR spectra for compounds 3a–3af

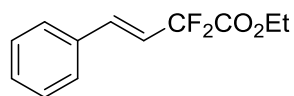

#### **Ethyl-2,2-difluoro-4-phenylbut-3-enoate (3a, *E/Z* = 95:5)**

The procedure was operated with the general procedure. The product **3a** was purified with flash silica gel chromatography (PE/EA = 60:1) as a colorless clear liquid (78%, 26.4 mg). This compound is known.<sup>1</sup>

<sup>1</sup>H NMR (400 MHz, CDCl<sub>3</sub>): 7.45-7.43 (m, 2H), 7.38 – 7.34 (m, 3H), 7.09 (dt, *J* = 16.1, 2.4 Hz, 1H), 6.31 (dt, *J* = 16.2, 11.4 Hz, 1H), 4.35 (q, *J* = 7.1 Hz, 2H), 1.35 (t, *J* = 7.1 Hz, 3H). <sup>13</sup>C NMR (100 MHz, CDCl<sub>3</sub>): 163.8 (t, *J* = 34.7 Hz), 136.8 (t, *J* = 9.4 Hz), 134.0, 129.6, 128.8, 127.4, 118.8 (t, *J* = 24.8 Hz), 112.7 (t, *J* = 246.9 Hz), 63.0, 13.9. <sup>19</sup>F NMR (476 MHz, CDCl<sub>3</sub>): -103.1.

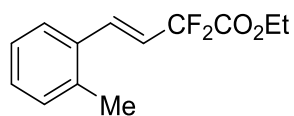

#### **Ethyl-2, 2-difluoro-4-(o-tolyl)but-3-enoate (3b, *E/Z* = 98:2),**

The procedure was operated with the general procedure. The product **3b** was purified with flash silica gel chromatography (PE/EA = 60:1) as a colorless clear liquid (78%, 28.0 mg). This compound is known.<sup>1</sup>

<sup>1</sup>H NMR (400 MHz, CDCl<sub>3</sub>): 7.45 (d, *J* = 7.8 Hz, 1H), 7.35 (d, *J* = 16.8 Hz, 1H), 7.26-7.16 (m, 3H), 6.20 (dt, *J* = 16.0, 11.3 Hz, 1H), 4.35 (q, *J* = 7.1 Hz, 2H), 2.38 (s, 3H), 1.35 (t, *J* = 7.1 Hz, 3H). <sup>13</sup>C NMR (100 MHz, CDCl<sub>3</sub>): 163.9, (t, *J* = 34.5 Hz), 136.7, 134.6 (t, *J* = 9.3 Hz), 133.1, 130.6, 129.3, 126.2, 126.0, 120.0 (t, *J* = 24.8 Hz), 112.7 (t, *J* = 246.9 Hz), 63.0, 19.5, 13.9. <sup>19</sup>F NMR (376 MHz, CDCl<sub>3</sub>): -102.9 (s, 2F).

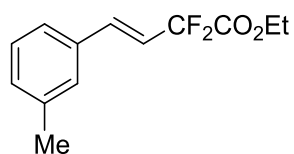

#### **Ethyl-2, 2-difluoro-4-(m-tolyl)but-3-enoate (3c, *E/Z* = 96:4),**

The procedure was operated with the general procedure. The product **3c** was purified with flash silica gel chromatography (PE/EA = 60:1) as a colorless clear liquid (85%, 30.6 mg). This compound is known.<sup>1</sup>

<sup>1</sup>H NMR (400 MHz, CDCl<sub>3</sub>) 7.24 (d, *J* = 5.6 Hz, 3H), 7.15 (d, *J* = 5.3 Hz, 1H), 7.02(dt, *J* = 16.2, 2.5 Hz, 1H), 6.28 (dt, *J* = 16.1, 11.4 Hz), 4.34 (q, *J* = 7.1 Hz, 2H), 2.35 (s, 3H), 1.35 (t, *J* = 7.1 Hz, 3H). <sup>13</sup>C NMR (100 MHz, CDCl<sub>3</sub>): 163.9 (t, *J* = 35.0 Hz), 138.4, 136.9 (t, *J* = 9.2 Hz), 133.9, 130.4, 128.6, 128.0, 124.6, 118.5 (t, *J* = 25.0 Hz), 112.7 (t, *J* = 246.3 Hz), 63.0, 21.2, 13.9. <sup>19</sup>F NMR (376 MHz, CDCl<sub>3</sub>): -103.0.

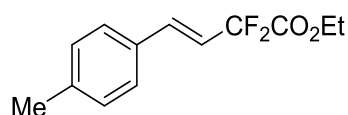

**Ethyl-2, 2-difluoro-4-(p-tolyl)but-3-enoate (3d, *E/Z* = 99:1),**

The procedure was operated with the general procedure. The product **3d** was purified with flash silica gel chromatography (PE/EA = 60:1) as a colorless clear liquid (90%, 32.4 mg). This compound is known.<sup>1</sup>

<sup>1</sup>H NMR (400 MHz, CDCl<sub>3</sub>): 7.32 (d, *J* = 8.0 Hz, 2H), 7.18 (d, *J* = 8.0 Hz, 2H), 7.05 (dt, *J* = 16.2, 2.4 Hz, 1H), 6.25 (dt, *J* = 16.1, 11.4 Hz, 1H), 4.34 (q, *J* = 7.1 Hz, 2H), 2.25 (s, 3H), 1.35 (t, *J* = 7.1 Hz, 3H). <sup>13</sup>C NMR (100 MHz, CDCl<sub>3</sub>): 164.0, (t, *J* = 35.5 Hz), 139.8, 136.7 (t, *J* = 9.5 Hz), 131.3, 129.5, 127.3, 117.7 (t, *J* = 24.9 Hz), 112.8 (t, *J* = 246.6 Hz), 63.0, 21.3, 13.9. <sup>19</sup>F NMR (376 MHz, CDCl<sub>3</sub>): -102.8.

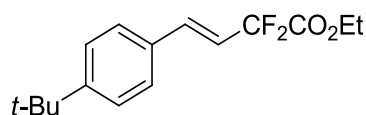

**Ethyl-2, 2-difluoro-4-(4-butylphenyl)but-3-enoate (3e, *E/Z* = 98:2)**

The procedure was operated with the general procedure. The product **3e** was purified with flash silica gel chromatography (PE/EA = 60:1) as a colorless clear liquid (76%, 32.1 mg). This compound is known.<sup>2</sup>

<sup>1</sup>H NMR (400 MHz, CDCl<sub>3</sub>): 7.39 (s, 4H), 7.04 (dt, *J* = 16.1, 2.5 Hz, 1H), 6.27 (dt, *J* = 16.1, 11.4 Hz, 1H), 4.33 (q, *J* = 7.1 Hz, 2H), 1.35 (t, *J* = 7.1 Hz, 3H), 1.32 (s, 9H). <sup>13</sup>C NMR (100 MHz, CDCl<sub>3</sub>): 163.9 (t, *J* = 34.9 Hz), 153.0, 136.5 (t, *J* = 9.4 Hz),

131.3, 127.2, 125.7, 117.9 (t,  $J = 24.9$  Hz), 112.8 (t,  $J = 246.8$  Hz), 62.9, 34.7, 31.1, 13.9.  $^{19}\text{F}$  NMR (376 MHz,  $\text{CDCl}_3$ ): -103.0.

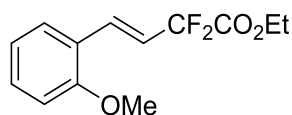

**Ethyl-2,2-difluoro-4-(2-methoxyphenyl)but-3-enoate (3f,  $E/Z = 98:2$ )**

The procedure was operated with the general procedure. The product **3f** was purified with flash silica gel chromatography (PE/EA = 60:1) as a colorless solid (82%, 31.4 mg). This compound is known.<sup>1</sup>

$^1\text{H}$  NMR (400 MHz,  $\text{CDCl}_3$ ): 7.42 (d,  $J = 7.4$  Hz, 1H), 7.38-7.29 (m, 2H), 6.96-6.88 (m, 2H), 6.40 (dt,  $J = 16.1, 11.4$  Hz, 1H), 4.34 (q,  $J = 7.1$  Hz, 2H), 3.86 (s, 3H), 1.36 (t,  $J = 7.1$  Hz, 3H).  $^{13}\text{C}$  NMR (100 MHz,  $\text{CDCl}_3$ ): 164.1 (t,  $J = 34.9$  Hz), 157.7, 132.1 (t,  $J = 9.7$  Hz), 130.7, 128.3, 122.9, 120.6, 119.2 (t,  $J = 24.6$  Hz), 113.0 (t,  $J = 246.6$  Hz), 111.0, 62.9, 55.3, 13.9.  $^{19}\text{F}$  NMR (376 MHz,  $\text{CDCl}_3$ ): -102.8.

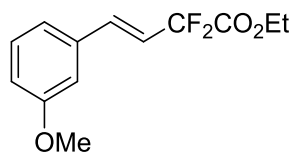

**Ethyl-2,2-difluoro-4-(3-methoxyphenyl)but-3-enoate (3g,  $E/Z = 99:1$ ),**

The procedure was operated with the general procedure. The product **3g** was purified with flash silica gel chromatography (PE/EA = 60:1) as a colorless clear liquid (85%, 32.6 mg). This compound is known.<sup>1</sup>

$^1\text{H}$  NMR (400 MHz,  $\text{CDCl}_3$ ): 7.28 (t,  $J = 7.9$  Hz, 1H), 7.07-7.02 (m, 2H), 6.96 (s, 1H), 6.90 (dd,  $J = 8.1, 2.2$  Hz, 1H), 6.29 (dt,  $J = 16.2, 11.4$  Hz, 1H), 4.34 (q,  $J = 7.1$  Hz, 2H), 3.82 (s, 3H), 1.36 (t,  $J = 7.1$  Hz, 3H).  $^{13}\text{C}$  NMR (100 MHz,  $\text{CDCl}_3$ ): 163.8, (t,  $J = 34.2$  Hz), 159.9, 136.7 (t,  $J = 9.3$  Hz), 135.4, 129.8, 120.0, 119.1 (t,  $J = 25.0$  Hz), 115.3, 112.6 (t,  $J = 246.9$  Hz), 112.5, 63.1, 55.2, 13.8.  $^{19}\text{F}$  NMR (376 MHz,  $\text{CDCl}_3$ ): -102.8.

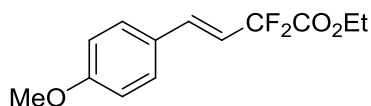

**Ethyl-2, 2-difluoro-4-(4-methoxy)but-3-enoate (3h, *E/Z* = 99:1)**

The procedure was operated with the general procedure. The product **3h** was purified with flash silica gel chromatography (PE/EA = 60:1) as a colorless clear liquid (82%, 31.4 mg). This compound is known.<sup>1</sup>

<sup>1</sup>H NMR (400 MHz, CDCl<sub>3</sub>): 7.37 (d, *J* = 8.7 Hz, 2H), 7.02 (dt, *J* = 16.1, 2.4 Hz, 1H), 6.89 (d, *J* = 8.7 Hz, 2H), 6.15 (dt, *J* = 16.1, 11.4 Hz, 1H), 4.35 (q, *J* = 7.1 Hz, 2H), 3.81 (s, 3H), 1.35 (t, *J* = 7.1 Hz, 3H). <sup>13</sup>C NMR (100 MHz, CDCl<sub>3</sub>): 164.0 (t, *J* = 35.0 Hz), 160.7, 136.2 (t, *J* = 9.4 Hz), 128.8, 126.7, 116.3 (t, *J* = 24.8 Hz), 114.1, 112.9 (t, *J* = 246.6 Hz), 62.9, 55.2, 13.9. <sup>19</sup>F NMR (376 MHz, CDCl<sub>3</sub>): -102.7.

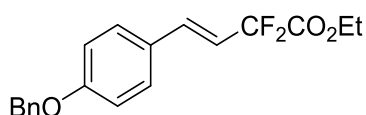

**Ethyl-2, 2-difluoro-4-(4-benzyloxy)but-3-enoate (3i, *E/Z* = 99:1)**

The procedure was operated with the general procedure. The product **3i** was purified with flash silica gel chromatography (PE/EA = 60:1) as a colorless clear liquid (72%, 35.7 mg). This compound is known.<sup>1</sup>

<sup>1</sup>H NMR (400 MHz, CDCl<sub>3</sub>): 7.42-7.30 (m, 7H), 7.02 (dt, *J* = 16.2, 2.4 Hz, 1H), 6.94 (d, *J* = 8.7 Hz, 2H), 6.14 (dt, *J* = 16.1, 11.4 Hz, 1H), 5.07 (s, 2H), 4.34 (q, *J* = 7.1 Hz, 2H), 1.35 (t, *J* = 9.3 Hz, 3H). <sup>13</sup>C NMR (100 MHz, CDCl<sub>3</sub>): 164.0 (t, *J* = 35.0 Hz), 159.9, 136.5, 136.2 (t, *J* = 9.4 Hz), 128.9, 128.6, 128.0, 127.4, 127.0, 116.5 (t, *J* = 24.9 Hz), 115.1, 112.8 (t, *J* = 246.7 Hz), 70.0, 62.9, 13.9. <sup>19</sup>F NMR (376 MHz, CDCl<sub>3</sub>): -102.6.

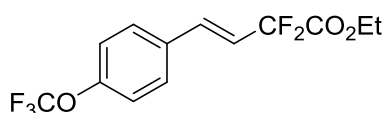

**Ethyl-2,2-difluoro-4-(4-(trifluoromethoxy)phenyl)but-3-enoate (3j, *E/Z* = 85:15)**

The procedure was operated with the general procedure. The product **3j** was purified with flash silica gel chromatography (PE/EA = 60:1) as a colorless solid (90%, 41.8



mg). This compound is known.<sup>1</sup>

<sup>1</sup>H NMR (400 MHz, CDCl<sub>3</sub>): 7.46 (d, *J* = 8.8 Hz, 2H), 7.21 (d, *J* = 8.4 Hz, 2H), 7.05 (dt, *J* = 16.0, 2.4 Hz, 1H), 6.28 (dt, *J* = 16.0, 11.3 Hz, 1H), 4.35 (q, *J* = 7.1 Hz, 2H), 1.36 (t, *J* = 7.1 Hz, 3H). <sup>13</sup>C NMR (100 MHz, CDCl<sub>3</sub>): 163.7 (t, *J* = 34.5 Hz), 149.9, 135.2 (t, *J* = 9.4 Hz), 132.7, 128.8, 121.1, 120.5 (q, *J* = 113.6 Hz), 119.9 (t, *J* = 25.0 Hz), 112.4 (t, *J* = 247.3 Hz), 63.1, 13.9. <sup>19</sup>F NMR (376 MHz, CDCl<sub>3</sub>): -57.8 (s, 3F), -103.3 (s, 2F).

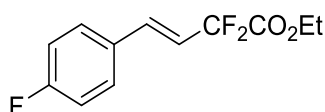

**Ethyl-2,2-difluoro-4-(4-fluorophenyl)but-3-enoate (3k, *E/Z* = 97:3)**

The procedure was operated with the general procedure. The product **3k** was purified with flash silica gel chromatography (PE/EA = 60:1) as a colorless clear liquid (86%, 31.4 mg). This compound is known.<sup>1</sup>

<sup>1</sup>H NMR (400 MHz, CDCl<sub>3</sub>): 7.43 (dd, *J* = 8.4, 5.2 Hz, 2H), 7.08-7.02 (m, 3H), 6.22 (dt, *J* = 16.1, 11.3 Hz, 1H), 4.34 (q, *J* = 7.1 Hz, 2H), 1.36 (t, *J* = 7.1 Hz, 3H). <sup>13</sup>C NMR (100 MHz, CDCl<sub>3</sub>): 163.8 (t, *J* = 34.6 Hz), 162.2 (t, *J* = 248.5 Hz), 135.5 (t, *J* = 9.5 Hz), 130.3, 129.2 (d, *J* = 8.2 Hz), 118.5 (td, *J* = 23.8, 2.0 Hz), 115.8 (d, *J* = 21.8 Hz), 112.5 (t, *J* = 246.9 Hz), 63.1, 13.9. <sup>19</sup>F NMR (376 MHz, CDCl<sub>3</sub>): -103.1 (s, 2F), -110.9 (s, F).

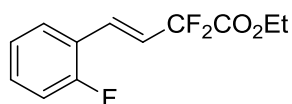

**Ethyl-2,2-difluoro-4-(2-fluorophenyl)but-3-enoate (3l, *E/Z* = 84:16)**

The procedure was operated with the general procedure. The product **3l** was purified with flash silica gel chromatography (PE/EA = 60:1) as a colorless clear liquid (62%, 22.6 mg). This compound is known.<sup>1</sup>

<sup>1</sup>H NMR (400 MHz, CDCl<sub>3</sub>): 7.46 (td, *J* = 7.6, 1.5 Hz, 1H), 7.35-7.29 (m, 1H), 7.22 (dt, *J* = 16.4, 2.6 Hz, 1H), 7.16-7.05 (m, 2H), 6.42 (dt, 16.1, 11.3 Hz, 1H), 4.36 (q, *J*

= 7.1 Hz, 2H), 1.36 (t,  $J = 7.1$  Hz, 3H).  $^{13}\text{C}$  NMR (100 MHz,  $\text{CDCl}_3$ ): 163.7 (t,  $J = 34.6$  Hz), 162.1 (t,  $J = 251.0$  Hz), 131.1 (d,  $J = 8.9$  Hz), 129.7 (td,  $J = 9.7, 3.1$  Hz), 128.6 (d,  $J = 2.7$  Hz), 124.3 (d,  $J = 3.6$  Hz), 122.1 (d,  $J = 11.6$  Hz), 121.5 (td,  $J = 24.8, 6.6$  Hz), 116.1 (d,  $J = 21.8$  Hz), 112.5 (t,  $J = 247.2$  Hz), 63.1, 13.8.  $^{19}\text{F}$  NMR (376 MHz,  $\text{CDCl}_3$ ): -103.6 (s, 2F), -115.7 (s, F).

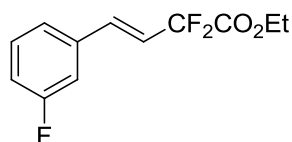

**Ethyl-2,2-difluoro-4-(3-fluorophenyl)but-3-enoate (3m,  $E/Z = 77:23$ )**

The procedure was operated with the general procedure. The product **3m** was purified with flash silica gel chromatography (PE/EA = 60:1) as a colorless clear liquid (72%, 26.3 mg). This compound is known.<sup>2</sup>

$^1\text{H}$  NMR (400 MHz,  $\text{CDCl}_3$ ): 7.36-7.28 (m, 1H), 7.21 (d,  $J = 7.6$  Hz, 1H), 7.15 (d,  $J = 9.8$  Hz, 1H), 7.06-7.02 (m, 2H), 6.31 (dt, 16.1, 11.3 Hz, 1H), 4.36 (q,  $J = 7.1$  Hz, 2H), 1.36 (t,  $J = 7.1$  Hz, 3H).  $^{13}\text{C}$  NMR (100 MHz,  $\text{CDCl}_3$ ): 163.6 (t,  $J = 34.4$  Hz), 161.7 (t,  $J = 245.1$  Hz), 136.3 (d,  $J = 7.9$  Hz), 135.7 (td,  $J = 9.4, 2.4$  Hz), 130.4 (d,  $J = 8.1$  Hz), 123.4 (d,  $J = 2.0$  Hz), 120.2 (t,  $J = 25.0$  Hz), 116.5 (d,  $J = 21.2$  Hz), 113.9 (d,  $J = 22.0$  Hz), 112.4 (t,  $J = 247.2$  Hz), 63.1, 13.8.  $^{19}\text{F}$  NMR (376 MHz,  $\text{CDCl}_3$ ): -103.4 (s, 2F), -112.6 (s, F).

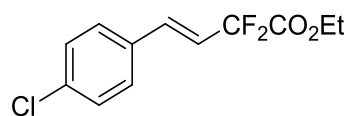

**Ethyl-4-(4-chlorophenyl)-2,2-difluorobut-3-enoate (3n,  $E/Z = 93:7$ )**

The procedure was operated with the general procedure. The product **3n** was purified with flash silica gel chromatography (PE/EA = 60:1) as a colorless clear liquid (64%, 25.0 mg). This compound is known.<sup>1</sup>

$^1\text{H}$  NMR (400 MHz,  $\text{CDCl}_3$ ): 7.35 (dd,  $J = 16.0, 8.8$  Hz, 4H), 7.02 (dt,  $J = 16.1, 2.4$  Hz, 1H), 6.28 (dt,  $J = 16.2, 11.3$  Hz, 1H), 4.35 (q,  $J = 7.1$  Hz, 2H), 1.36 (t,  $J = 7.1$  Hz, 3H).  $^{13}\text{C}$  NMR (100 MHz,  $\text{CDCl}_3$ ): 163.7 (t,  $J = 34.5$  Hz), 135.53 (t,  $J = 10.0$  Hz),

135.49, 132.5, 129.0, 128.6, 119.4 (t,  $J = 25.0$  Hz), 112.5 (t,  $J = 247.3$  Hz), 63.1, 13.9.  
 $^{19}\text{F}$  NMR (376 MHz,  $\text{CDCl}_3$ ): -103.3.

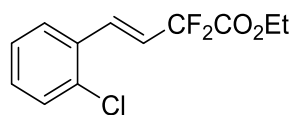

**Ethyl-4-(2-chlorophenyl)-2,2-difluorobut-3-enoate (3o,  $E/Z = 85:15$ )**

The procedure was operated with the general procedure. The product **3o** was purified with flash silica gel chromatography (PE/EA = 60:1) as a colorless clear liquid (60%, 23.4 mg). This compound is known.<sup>1</sup>

$^1\text{H}$  NMR (400 MHz,  $\text{CDCl}_3$ ): 7.56-7.53 (m, 1H), 7.51 (dt,  $J = 16.2, 2.4$  Hz, 1H), 7.40-7.37 (m, 1H), 7.28-7.25 (m, 2H), 6.30 (dt,  $J = 16.4, 11.3$  Hz, 1H), 4.35 (q,  $J = 7.1$  Hz, 2H), 1.37 (t,  $J = 7.1$  Hz, 3H).  $^{13}\text{C}$  NMR (100 MHz,  $\text{CDCl}_3$ ): 163.6 (t,  $J = 34.5$  Hz), 134.2, 133.1 (t,  $J = 9.6$  Hz), 130.5, 130.0, 127.3, 127.0, 121.5 (t,  $J = 25.0$  Hz), 112.4 (t,  $J = 247.2$  Hz), 63.1, 13.9.  $^{19}\text{F}$  NMR (376 MHz,  $\text{CDCl}_3$ ): -103.1.

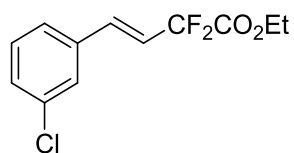

**Ethyl-4-(3-chlorophenyl)-2,2-difluorobut-3-enoate (3p,  $E/Z = 76:24$ )**

The procedure was operated with the general procedure. The product **3p** was purified with flash silica gel chromatography (PE/EA = 60:1) as a colorless clear liquid (60%, 23.4 mg). This compound is known.<sup>1</sup>

$^1\text{H}$  NMR (400 MHz,  $\text{CDCl}_3$ ): 7.43 (s, 1H), 7.33-7.27 (m, 3H), 7.00 (dt,  $J = 16.0, 2.4$  Hz, 1H), 6.30 (dt,  $J = 16.2, 11.3$  Hz, 1H), 4.36 (q,  $J = 7.1$  Hz, 2H), 1.36 (t,  $J = 7.1$  Hz, 3H).  $^{13}\text{C}$  NMR (100 MHz,  $\text{CDCl}_3$ ): 163.6 (t,  $J = 34.3$  Hz), 135.8, 135.4 (t,  $J = 9.4$  Hz), 134.8, 130.0, 129.5, 127.2, 125.5, 120.3 (t,  $J = 24.8$  Hz), 112.3 (t,  $J = 247.6$  Hz), 63.2, 13.9.  $^{19}\text{F}$  NMR (376 MHz,  $\text{CDCl}_3$ ): -103.5.

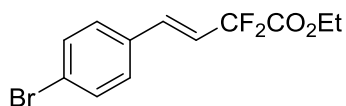

**Ethyl-4-(4-bromophenyl)-2,2-difluorobut-3-enoate (3q, *E/Z* = 88:12)**

The procedure was operated with the general procedure. The product **3q** was purified with flash silica gel chromatography (PE/EA = 60:1) as a colorless clear liquid (67%, 30.7 mg). This compound is known.<sup>1</sup>

<sup>1</sup>H NMR (400 MHz, CDCl<sub>3</sub>): 7.48 (d, *J* = 8.4 Hz, 2H), 7.29 (d, *J* = 8.8 Hz, 2H), 7.02 (dt, *J* = 16.4, 2.4 Hz, 1H), 6.29 (dt, *J* = 16.2, 11.3 Hz, 1H), 4.35 (q, *J* = 7.1 Hz, 2H), 1.35 (t, *J* = 7.1 Hz, 3H). <sup>13</sup>C NMR (100 MHz, CDCl<sub>3</sub>): 163.6 (t, *J* = 34.5 Hz), 135.5 (t, *J* = 10.0 Hz), 132.9, 131.9, 128.8, 123.7, 119.5 (t, *J* = 25.0 Hz), 112.4 (t, *J* = 247.3 Hz), 63.1, 13.9. <sup>19</sup>F NMR (376 MHz, CDCl<sub>3</sub>): -103.3.

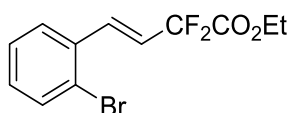

**Ethyl-4-(2-bromophenyl)-2,2-difluorobut-3-enoate (3r, *E/Z* = 82:18)**

The procedure was operated with the general procedure. The product **3r** was purified with flash silica gel chromatography (PE/EA = 60:1) as a colorless clear liquid (60%, 27.4 mg). This compound is known.<sup>2</sup>

<sup>1</sup>H NMR (400 MHz, CDCl<sub>3</sub>): 7.58 (d, *J* = 8.0 Hz, 1H), 7.52 (dd, *J* = 8.0, 1.2 Hz, 1H), 7.47 (dt, *J* = 16.2, 2.4 Hz, 1H), 7.33-7.29 (m, 1H), 7.22-7.18 (m, 1H), 6.28 (dt, *J* = 16.1, 11.0 Hz, 1H), 4.35 (q, *J* = 7.1 Hz, 2H), 1.37 (t, *J* = 7.1 Hz, 3H). <sup>13</sup>C NMR (100 MHz, CDCl<sub>3</sub>): 163.5 (t, *J* = 34.2 Hz), 135.7 (t, *J* = 9.6 Hz), 133.2, 130.7, 127.7, 127.4, 124.5, 121.6 (t, *J* = 25.0 Hz), 112.3 (t, *J* = 247.1 Hz), 63.1, 13.9. <sup>19</sup>F NMR (376 MHz, CDCl<sub>3</sub>): -103.0.

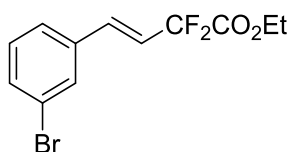

**Ethyl-4-(3-bromophenyl)-2,2-difluorobut-3-enoate (3s, *E/Z* = 80:20)**

The procedure was operated with the general procedure. The product **3s** was purified with flash silica gel chromatography (PE/EA = 60:1) as a colorless clear liquid (65%, 29.7 mg).

<sup>1</sup>H NMR (400 MHz, CDCl<sub>3</sub>): 7.59 (s, 1H), 7.46 (d, *J* = 8.9 Hz, 1H), 7.35 (d, *J* = 8.0 Hz, 1H), 7.27-7.21 (m, 1H), 7.02 (dt, *J* = 16.2, 2.3 Hz, 1H), 6.31 (dt, *J* = 16.2, 11.2 Hz, 1H), 4.35 (q, *J* = 7.1 Hz, 2H), 1.36 (t, *J* = 7.1 Hz, 3H). <sup>13</sup>C NMR (100 MHz, CDCl<sub>3</sub>): 163.6 (t, *J* = 34.4 Hz), 136.1, 135.3 (t, *J* = 9.4 Hz), 132.4, 130.3, 130.1, 126.1, 122.9, 120.4 (t, *J* = 24.9 Hz), 112.3 (t, *J* = 247.4 Hz), 63.2, 13.9. <sup>19</sup>F NMR (376 MHz, CDCl<sub>3</sub>): -103.4. HRMS (ESI) (*m/z*): [M+NH<sub>4</sub>]<sup>+</sup> calcd. for C<sub>12</sub>H<sub>11</sub>BrF<sub>2</sub>O<sub>2</sub>: 322.0249, found: 322.0253.

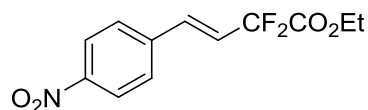

**Ethyl-2,2-difluoro-4-(4-nitrophenyl)but-3-enoate (3t, *E/Z* = 85:15)**

The procedure was operated with the general procedure. The product **3t** was purified with flash silica gel chromatography (PE/EA = 60:1) as a yellow solid (61%, 24.7 mg). This compound is known.<sup>1</sup>

<sup>1</sup>H NMR (400 MHz, CDCl<sub>3</sub>): 8.23 (d, *J* = 8.8 Hz, 2H), 7.62 (d, *J* = 8.8 Hz, 2H), 7.14 (dt, *J* = 16.2, 2.4 Hz, 1H), 6.46 (dt, *J* = 16.2, 11.1 Hz, 1H), 4.36 (q, *J* = 7.1 Hz, 2H), 1.38 (t, *J* = 7.1 Hz, 3H). <sup>13</sup>C NMR (100 MHz, CDCl<sub>3</sub>): 163.3 (t, *J* = 34.4 Hz), 148.2, 140.2, 134.5 (t, *J* = 9.2 Hz), 128.1, 124.1, 123.2 (t, *J* = 25.1 Hz), 112.0 (t, *J* = 248.0 Hz), 63.4, 13.9. <sup>19</sup>F NMR (376 MHz, CDCl<sub>3</sub>): -103.9.

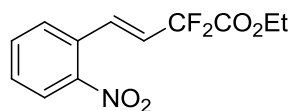

**Ethyl-2,2-difluoro-4-(2-nitrophenyl)but-3-enoate (3u, *E/Z* = 91:9)**

The procedure was operated with the general procedure. The product **3u** was purified with flash silica gel chromatography (PE/EA = 60:1) as a yellow solid (56%, 22.7mg). This compound is known.<sup>1</sup>

$^1\text{H}$  NMR (400 MHz,  $\text{CDCl}_3$ ): 8.04 (dd,  $J = 8.1, 1.0$  Hz, 1H), 7.68-7.51 (m, 4H), 6.26 (dt,  $J = 16.0, 10.8$  Hz, 1H), 4.37 (q,  $J = 7.1$  Hz, 2H), 1.39 (t,  $J = 7.1$  Hz, 3H).  $^{13}\text{C}$  NMR (100 MHz,  $\text{CDCl}_3$ ): 163.3 (t,  $J = 34.0$  Hz), 147.9, 133.6, 133.2 (t,  $J = 10.0$  Hz), 130.3, 129.9, 129.1, 124.9, 123.9 (t,  $J = 25.5$  Hz), 112.0 (t,  $J = 247.5$  Hz), 63.3, 13.8.  $^{19}\text{F}$  NMR (376 MHz,  $\text{CDCl}_3$ ): -103.2.

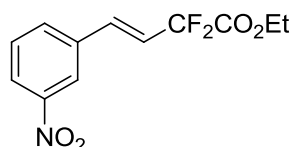

**Ethyl-2,2-difluoro-4-(3-nitrophenyl)but-3-enoate (3v,  $E/Z = 58:42$ )**

The procedure was operated with the general procedure. The product **3v** was purified with flash silica gel chromatography (PE/EA = 60:1) as a yellow solid (42%, 17.0 mg).

$^1\text{H}$  NMR (400 MHz,  $\text{CDCl}_3$ ): 8.32 (t,  $J = 1.7$  Hz, 1H), 8.24-8.17 (m, 2H), 7.77 (d,  $J = 7.7$  Hz, 1H), 7.60-7.56 (m, 1H), 7.15 (dt,  $J = 16.2, 2.5$  Hz, 1H), 6.48 (dt,  $J = 16.0, 10.8$  Hz, 1H), 4.36 (q,  $J = 7.1$  Hz, 2H), 1.38 (t,  $J = 7.1$  Hz, 3H).  $^{13}\text{C}$  NMR (100 MHz,  $\text{CDCl}_3$ ): 163.3 (t,  $J = 34.1$  Hz), 163.1 (t,  $J = 33.3$  Hz), 148.6, 136.0 (t,  $J = 7.5$  Hz), 135.8, 134.7 (t,  $J = 3.0$  Hz), 134.4 (t,  $J = 9.8$  Hz), 133.1, 129.9, 129.1, 124.9, 124.1 (t,  $J = 26.2$  Hz), 124.0, 123.7 (t,  $J = 3.0$  Hz), 123.2, 122.1 (t,  $J = 25.0$  Hz), 121.9, 112.1 (t,  $J = 247.8$  Hz), 111.9 (t,  $J = 247.2$  Hz), 63.3, 13.8.  $^{19}\text{F}$  NMR (376 MHz,  $\text{CDCl}_3$ ): -103.7. HRMS (ESI) ( $m/z$ ):  $[\text{M}+\text{K}]^+$  calcd. for  $\text{C}_{12}\text{H}_{11}\text{F}_2\text{NO}_4$ : 310.0288, found: 310.0290.

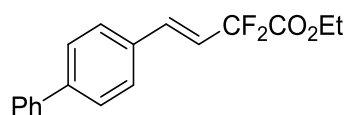

**Ethyl-2,2-difluoro-4-([1,1'-biphenyl]-4-yl)but-3-enoate (3w,  $E/Z = 99:1$ )**

The procedure was operated with the general procedure. The product **3w** was purified with flash silica gel chromatography (PE/EA = 60:1) as a white solid (66%, 29.8 mg).

This compound is known.<sup>2</sup>

$^1\text{H}$  NMR (400 MHz,  $\text{CDCl}_3$ ): 7.55 (d,  $J = 8.3$  Hz, 4H), 7.48 (d,  $J = 8.2$  Hz, 2H), 7.41 (t,  $J = 7.3$  Hz, 2H), 7.33 (t,  $J = 7.2$  Hz, 1H), 7.08 (d, 16.2 Hz, 1H), 6.32 (dt, 16.1, 11.3 Hz, 1H), 4.32 (q,  $J = 7.1$  Hz, 2H), 1.33 (t,  $J = 7.1$  Hz, 3H).  $^{13}\text{C}$  NMR (100 MHz,  $\text{CDCl}_3$ ): 163.8 (t,  $J = 34.6$  Hz), 142.3, 140.0, 136.3 (t,  $J = 9.4$  Hz), 132.9, 128.8, 127.8, 127.6, 127.3, 126.9, 118.6 (t,  $J = 25.0$  Hz), 112.7 (t,  $J = 246.9$  Hz), 63.0, 13.8.  $^{19}\text{F}$  NMR (376 MHz,  $\text{CDCl}_3$ ): -102.9.

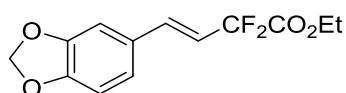

**Ethyl-2,2-difluoro-4-(benzo[d][1,3]dioxol-5-yl)but-3-enoate (3x,  $E/Z = 99:1$ )**

The procedure was operated with the general procedure. The product **3x** was purified with flash silica gel chromatography (PE/EA = 60:1) as a colorless clear liquid (78%, 31.5 mg). This compound is known.<sup>1</sup>

$^1\text{H}$  NMR (400 MHz,  $\text{CDCl}_3$ ): 6.99-6.94 (m, 2H), 6.89 (d,  $J = 8.0$  Hz, 1H), 6.77 (d,  $J = 8.0$  Hz, 1H), 6.12 (dt,  $J = 16.1, 11.4$  Hz, 1H), 5.98 (s, 2H), 4.34 (q,  $J = 7.1$  Hz, 2H), 1.35 (t,  $J = 7.1$  Hz, 3H).  $^{13}\text{C}$  NMR (100 MHz,  $\text{CDCl}_3$ ): 163.9 (t,  $J = 34.7$  Hz), 148.9, 148.2, 136.3 (t,  $J = 9.4$  Hz), 128.4, 123.1, 116.7 (t,  $J = 24.8$  Hz), 112.8 (t,  $J = 246.9$  Hz), 108.3, 106.1, 101.4, 63.0, 13.8.  $^{19}\text{F}$  NMR (376 MHz,  $\text{CDCl}_3$ ): -102.6.

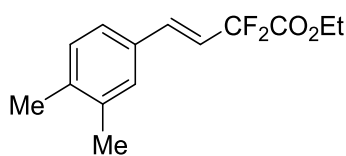

**Ethyl-2,2-difluoro-4-(3,4-dimethylphenyl)but-3-enoate (3y,  $E/Z = 99:1$ )**

The procedure was operated with the general procedure. The product **3y** was purified with flash silica gel chromatography (PE/EA = 60:1) as a yellow clear liquid (82 %, 31.2 mg). This compound is known.<sup>2</sup>

$^1\text{H}$  NMR (400 MHz,  $\text{CDCl}_3$ ): 7.21 (s, 1H), 7.16 (d,  $J = 7.8$  Hz, 1H), 7.10 (d,  $J = 7.7$  Hz, 1H), 7.02 (dt,  $J = 16.1, 2.4$  Hz, 1H), 6.23 (dt,  $J = 16.0, 11.4$  Hz, 1H), 4.34 (q,  $J = 7.1$  Hz, 2H), 2.25 (s, 6H), 1.35 (t,  $J = 7.1$  Hz, 3H).  $^{13}\text{C}$  NMR (100 MHz,  $\text{CDCl}_3$ ): 164.0 (t,  $J = 35.0$  Hz), 138.5, 137.0, 136.8 (t,  $J = 9.3$  Hz), 131.7, 130.0, 128.5, 124.9,

117.5 (t,  $J = 24.8$  Hz), 112.8 (t,  $J = 247.1$  Hz), 62.9, 19.64, 19.60, 13.8.  $^{19}\text{F}$  NMR (376 MHz,  $\text{CDCl}_3$ ): -102.8.

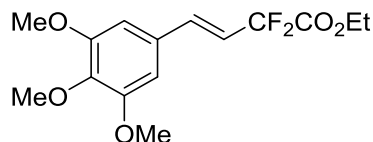

**Ethyl-2,2-difluoro-4-(3,4,5-trimethoxyphenyl)but-3-enoate (3z,  $E/Z = 98:2$ )**

The procedure was operated with the general procedure. The product **3z** was purified with flash silica gel chromatography (PE/EA = 60:1) as a colorless clear liquid (75 %, 35.5 mg). This compound is known.<sup>1</sup>

$^1\text{H}$  NMR (400 MHz,  $\text{CDCl}_3$ ): 7.02 (dt,  $J = 16.1, 2.4$  Hz, 1H), 6.67 (s, 2H), 6.22 (dt,  $J = 16.0, 11.4$  Hz, 1H), 4.35 (q,  $J = 7.1$  Hz, 2H), 3.88 (s, 6H), 3.86 (s, 3H) 1.36 (t,  $J = 7.1$  Hz, 3H).  $^{13}\text{C}$  NMR (100 MHz,  $\text{CDCl}_3$ ): 163.8 (t,  $J = 34.7$  Hz), 153.3, 139.4, 136.7 (t,  $J = 9.4$  Hz), 129.5, 118.0 (t,  $J = 24.9$  Hz), 112.6 (t,  $J = 247.1$  Hz), 104.5, 63.0, 60.7, 13.8.  $^{19}\text{F}$  NMR (376 MHz,  $\text{CDCl}_3$ ): -102.9.

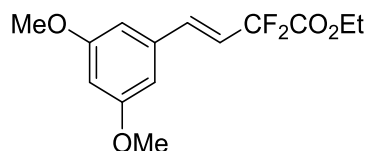

**Ethyl-2,2-difluoro-4-(3,5-dimethoxyphenyl)but-3-enoate (3aa,  $E/Z = 98:2$ )**

The procedure was operated with the general procedure. The product **3aa** was purified with flash silica gel chromatography (PE/EA = 60:1) as a colorless clear liquid (55 %, 23.5 mg).

$^1\text{H}$  NMR (400 MHz,  $\text{CDCl}_3$ ): 7.01 (dt,  $J = 16.1, 2.4$  Hz, 1H), 6.58 (d,  $J = 2.0$  Hz, 2H), 6.46 (t,  $J = 2.0$  Hz, 1H), 6.26 (dt,  $J = 16.1, 11.4$  Hz, 1H), 4.34 (q,  $J = 7.1$  Hz, 2H), 3.80 (s, 6H), 1.36 (t,  $J = 7.1$  Hz, 3H).  $^{13}\text{C}$  NMR (100 MHz,  $\text{CDCl}_3$ ): 163.8 (t,  $J = 34.5$  Hz), 161.0, 136.8 (t,  $J = 9.3$  Hz), 135.9, 119.3 (t,  $J = 24.8$  Hz), 112.6 (t,  $J = 247.1$  Hz), 105.4, 101.7, 63.1, 55.3, 13.9.  $^{19}\text{F}$  NMR (376 MHz,  $\text{CDCl}_3$ ): -103.2. HRMS (ESI) (m/z):  $[\text{M}+\text{K}]^+$  calcd. for  $\text{C}_{14}\text{H}_{16}\text{F}_2\text{O}_4$ : 325.0648, found: 325.0653.



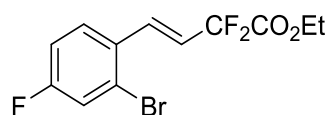

**Ethyl-2,2-difluoro-4-(2-bromo-4-fluorophenyl)but-3-enoate (3ab, *E/Z* = 80:20)**

The procedure was operated with the general procedure. The product **3ab** was purified with flash silica gel chromatography (PE/EA = 60:1) as a colorless clear liquid (62 %, 30.0 mg). This compound is known.<sup>1</sup>

<sup>1</sup>H NMR (400 MHz, CDCl<sub>3</sub>): 7.53 (dd, *J* = 8.7, 5.8 Hz, 1H), 7.37 (dt, *J* = 16.0, 2.5 Hz, 1H), 7.33 (dd, *J* = 8.2, 2.6 Hz, 1H), 7.05 (td, *J* = 8.3, 2.5 Hz, 1H), 6.21 (dt, *J* = 16.1, 11.4 Hz, 1H), 4.36 (q, *J* = 7.1 Hz, 2H), 1.37 (t, *J* = 7.1 Hz, 3H). <sup>13</sup>C NMR (100 MHz, CDCl<sub>3</sub>): 163.5 (t, *J* = 34.5 Hz), 161.4 (d, *J* = 242.3 Hz), 134.5 (t, *J* = 9.6 Hz), 130.5 (d, *J* = 3.8 Hz), 128.5 (d, *J* = 8.7 Hz), 124.6 (d, *J* = 9.5 Hz), 124.6 (d, *J* = 9.5 Hz), 121.5 (t, *J* = 25.4 Hz), 120.5 (d, *J* = 24.4 Hz), 115.0 (t, *J* = 21.5 Hz), 112.2 (t, *J* = 248.3 Hz), 63.1, 13.9. <sup>19</sup>F NMR (376 MHz, CDCl<sub>3</sub>): -103.0 (s, 2F), -109.0 (s, 1F).

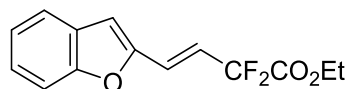

**Ethyl-2,2-difluoro-4-(benzofuran-2-yl)but-3-enoate (3ac, *E/Z* = 99:1)**

The procedure was operated with the general procedure. The product **3ac** was purified with flash silica gel chromatography (PE/EA = 60:1) as a colorless clear liquid (58%, 23.1 mg).

<sup>1</sup>H NMR (400 MHz, CDCl<sub>3</sub>): 7.55 (d, *J* = 7.7 Hz, 1H), 7.46 (d, *J* = 8.2 Hz, 1H), 7.35-7.31 (m, 1H), 7.22 (t, *J* = 8.2 Hz, 1H), 6.98 (dt, *J* = 15.8, 2.4 Hz, 1H), 6.81 (s, 1H), 6.51 (dt, *J* = 15.7, 12.0 Hz, 1H), 4.35 (q, *J* = 7.1 Hz, 2H), 1.37 (t, *J* = 7.1 Hz, 3H). <sup>13</sup>C NMR (100 MHz, CDCl<sub>3</sub>): 163.6 (t, *J* = 34.6 Hz), 155.2, 151.6, 128.2, 126.0, 124.5 (t, *J* = 9.8 Hz), 123.2, 121.6, 119.8 (t, *J* = 25.0 Hz), 112.4 (t, *J* = 256.2 Hz), 111.2, 109.3, 63.2, 13.9. <sup>19</sup>F NMR (376 MHz, CDCl<sub>3</sub>): -103.7. HRMS (ESI) (*m/z*): [M+K]<sup>+</sup> calcd. for C<sub>14</sub>H<sub>12</sub>F<sub>2</sub>O<sub>3</sub>: 305.0386, found: 305.0390.

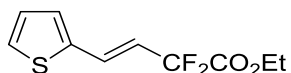

**Ethyl-2,2-difluoro-4-(thiophen-2-yl)but-3-enoate (3ad, *E/Z* = 99:1)**

The procedure was operated with the general procedure. The product **3ad** was purified with flash silica gel chromatography (PE/EA = 60:1) as a colorless clear liquid (70%, 24.3 mg). This compound is known.<sup>1</sup>

<sup>1</sup>H NMR (400 MHz, CDCl<sub>3</sub>): 7.31 (d, *J* = 4.9 Hz, 1H), 7.20-7.14 (m, 2H), 7.01 (dd, *J* = 4.8, 3.6 Hz, 1H), 6.12 (dt, *J* = 15.8, 11.5 Hz, 1H), 4.35 (q, *J* = 7.1 Hz, 2H), 1.36 (t, *J* = 7.1 Hz, 3H). <sup>13</sup>C NMR (100 MHz, CDCl<sub>3</sub>): 163.7 (t, *J* = 34.7 Hz), 138.8, 129.7 (t, *J* = 10.0 Hz), 129.3, 127.7, 127.2, 117.5 (t, *J* = 25.1 Hz), 112.4 (t, *J* = 247.1 Hz), 63.1, 13.9. <sup>19</sup>F NMR (376 MHz, CDCl<sub>3</sub>): -102.8.

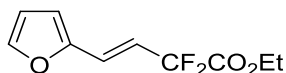

**Ethyl-2,2-difluoro-4-(furan-2-yl)but-3-enoate (3ae, *E/Z* = 99:1)**

The procedure was operated with the general procedure. The product **3ae** was purified with flash silica gel chromatography (PE/EA = 60:1) as a colorless clear liquid (52%, 16.5 mg). This compound is known.<sup>1</sup>

<sup>1</sup>H NMR (400 MHz, CDCl<sub>3</sub>): 7.43 (s, 1H), 6.87 (dt, *J* = 15.9, 2.5 Hz, 1H), 6.48 (d, *J* = 3.2 Hz, 1H), 6.42 (dd, *J* = 3.3, 1.8 Hz, 1H), 6.22 (dt, *J* = 15.8, 12.0 Hz, 1H), 4.32 (q, *J* = 7.1 Hz, 2H), 1.35 (t, *J* = 7.1 Hz, 3H). <sup>13</sup>C NMR (100 MHz, CDCl<sub>3</sub>): 163.7 (t, *J* = 34.6 Hz), 150.1, 143.9, 124.1 (t, *J* = 10.1 Hz), 116.6 (t, *J* = 25.0 Hz), 112.7, 112.6 (t, *J* = 246.9 Hz), 111.8, 63.0, 13.8. <sup>19</sup>F NMR (376 MHz, CDCl<sub>3</sub>): -103.4.

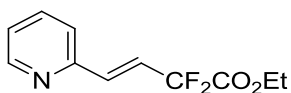

**Ethyl-2,2-difluoro-4-(pyridin-2-yl)but-3-enoate (3af, *E/Z* = 95:5)**

The procedure was operated with the general procedure. The product **3af** was purified with flash silica gel chromatography (PE/EA = 60:1) as a colorless clear liquid (15%, 5.1 mg). This compound is known.<sup>2</sup>

<sup>1</sup>H NMR (400 MHz, CDCl<sub>3</sub>): 8.62 (d, *J* = 4.2 Hz, 1H), 7.70 (td, *J* = 7.6, 1.7 Hz, 1H),

7.32 (d,  $J = 7.7$  Hz, 1H), 7.26-7.23 (m, 1H), 7.14 (dt,  $J = 15.8, 2.3$  Hz, 1H), 6.22 (dt,  $J = 15.8, 11.8$  Hz, 1H), 4.35 (q,  $J = 7.1$  Hz, 2H), 1.36 (t,  $J = 7.1$  Hz, 3H).  $^{13}\text{C}$  NMR (100 MHz,  $\text{CDCl}_3$ ): 163.5 (t,  $J = 34.3$  Hz), 152.2, 149.8, 136.7, 135.8 (t,  $J = 9.2$  Hz), 123.8, 123.5, 122.9 ( $J = 24.8$  Hz), 112.6 (t,  $J = 246.8$  Hz), 63.0, 13.7.  $^{19}\text{F}$  NMR (376 MHz,  $\text{CDCl}_3$ ): -103.8.

### References:

- 1) Li, G.; Wang, T.; Fei, F.; Su, Y. M.; Li, Y.; Lan, Q.; Wang, X. S. *Angew. Chem., Int. Ed.* **2016**, *55*, 3491-3495.
- 2) Ke, M.; Feng, Q.; Yang, K.; Song, Q. *Org. Chem. Front.* **2016**, *3*, 150-155.

# <sup>1</sup>H NMR and <sup>13</sup>C NMR Spectra of the Products

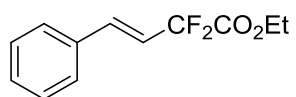

3a

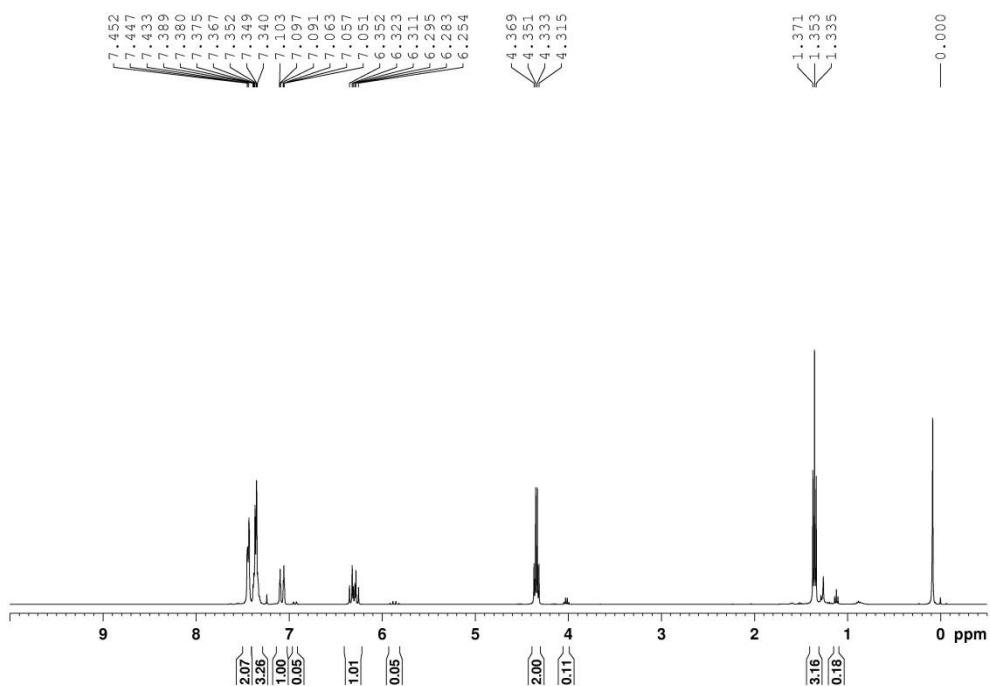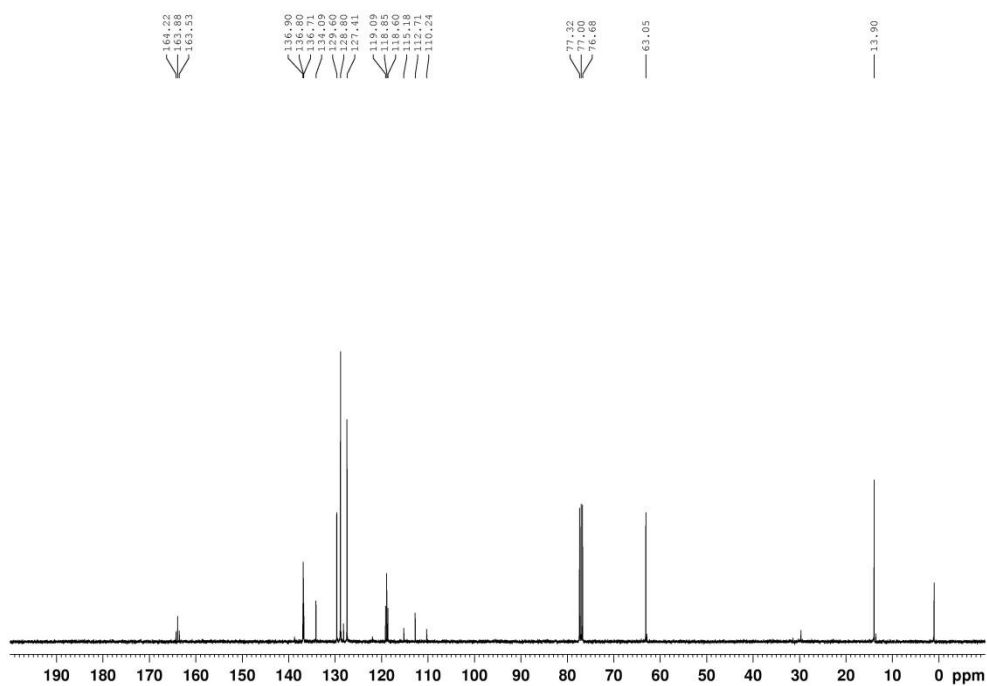

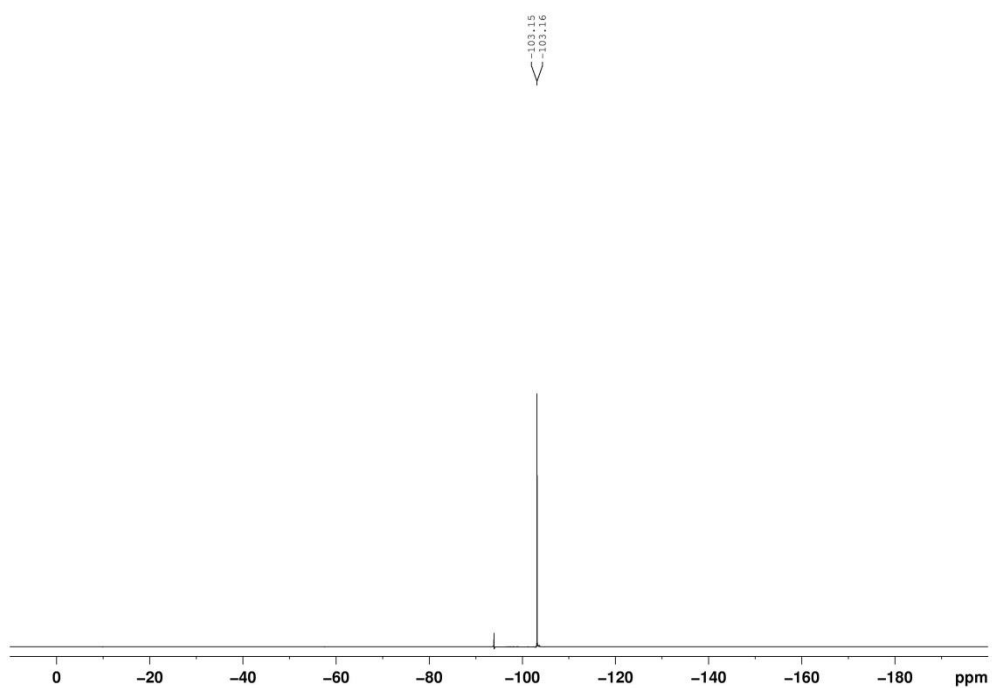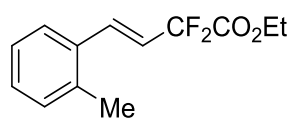

3b

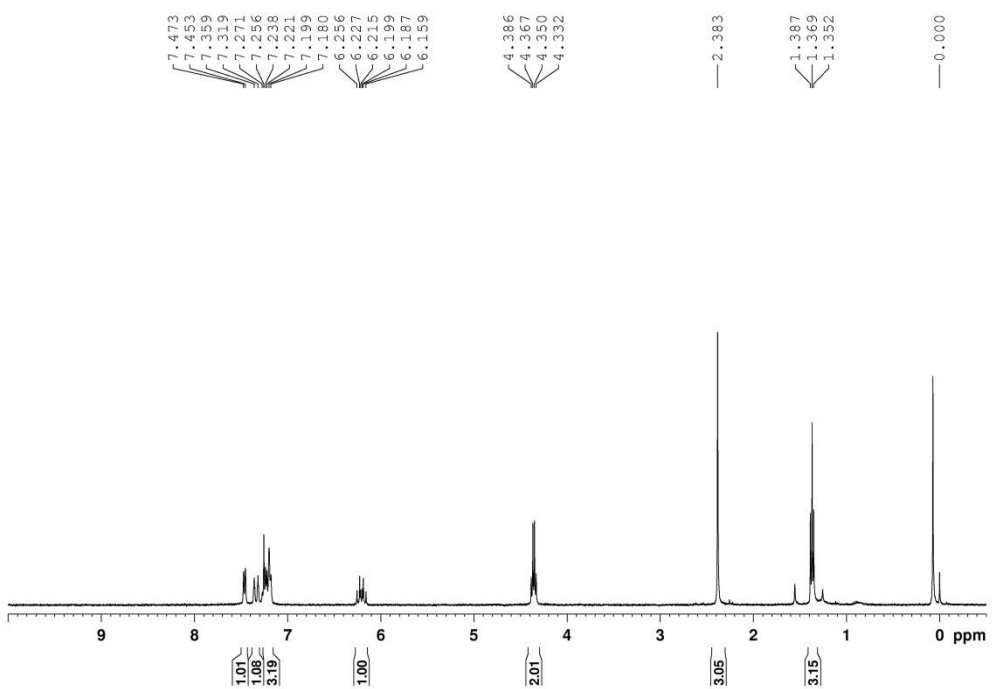

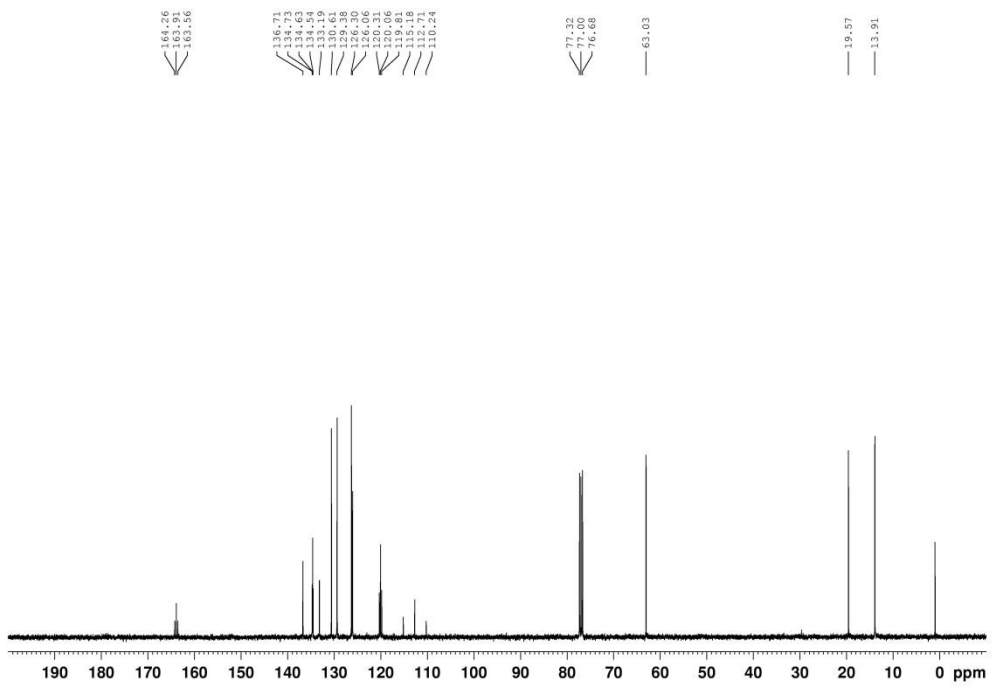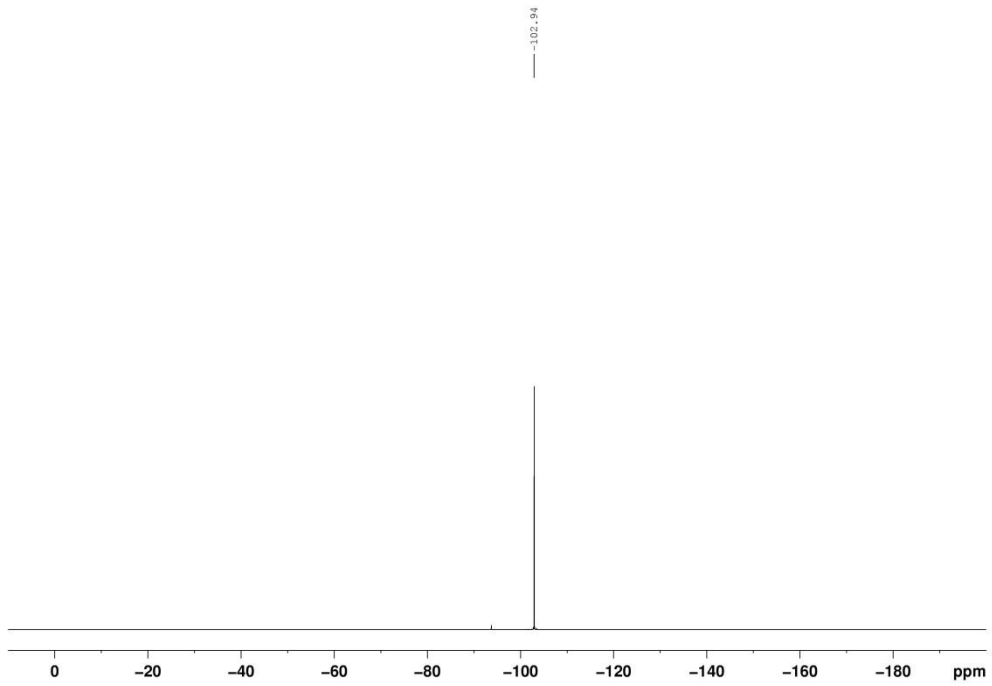

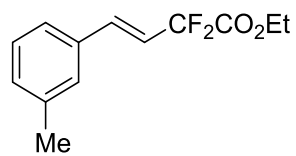

3c

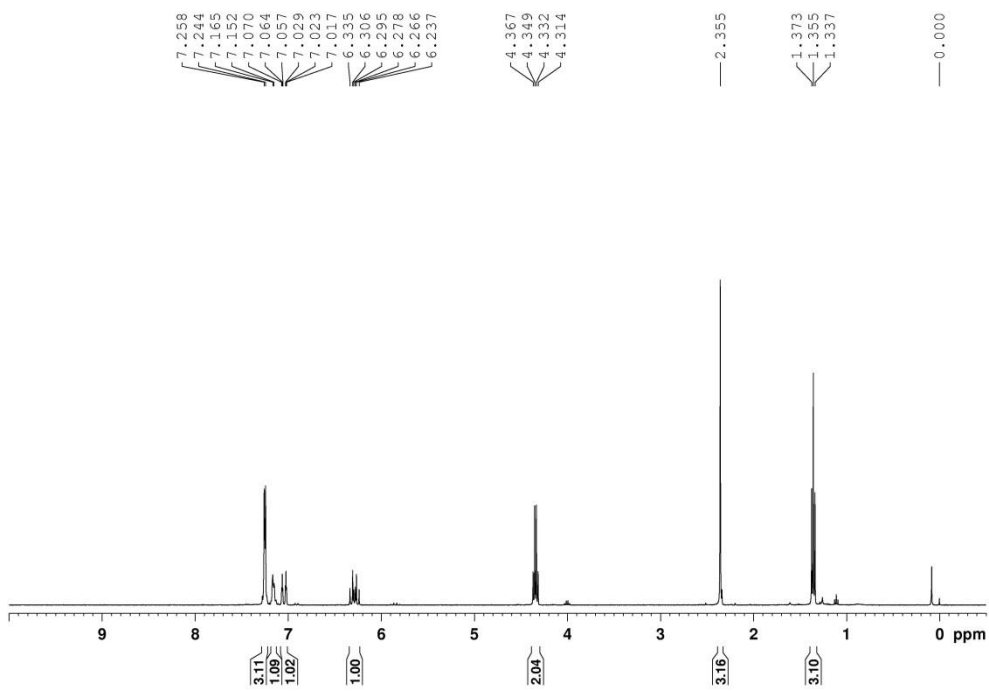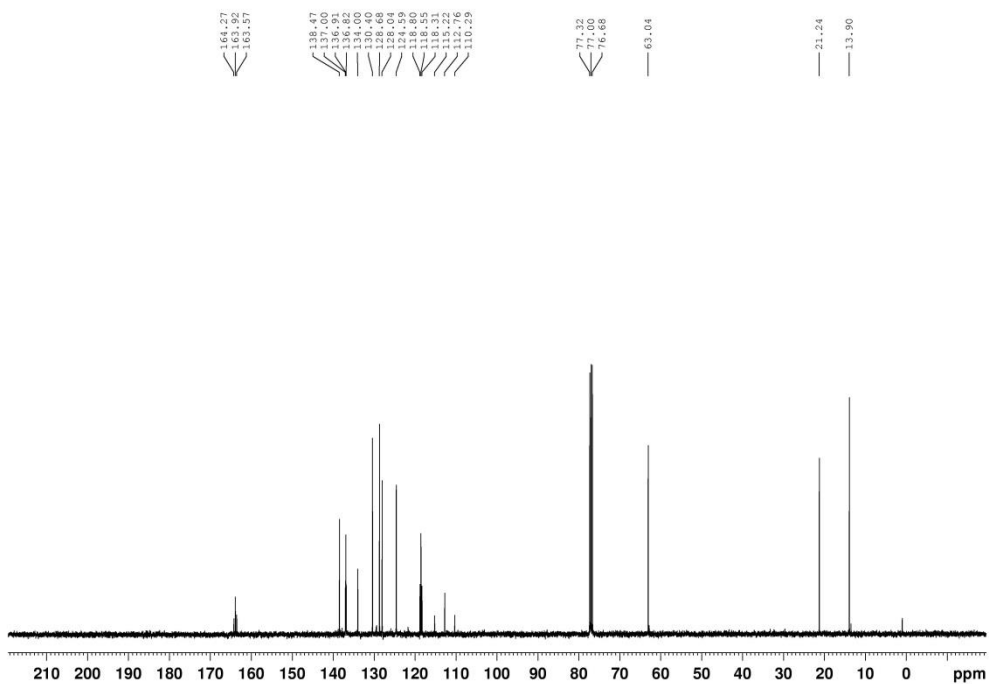

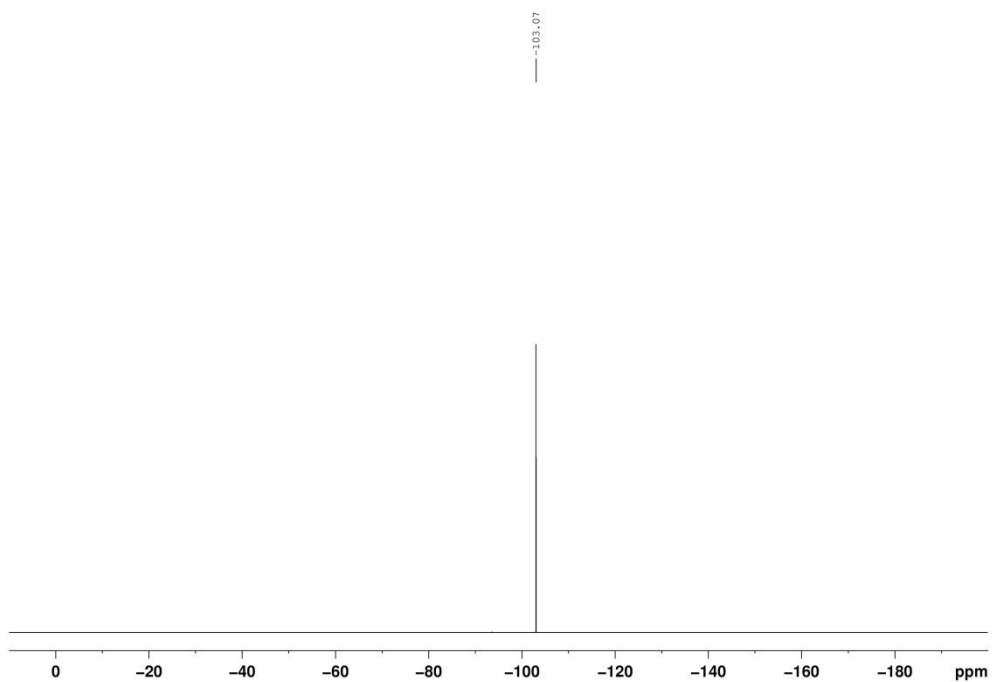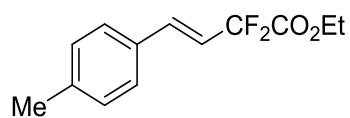

3d

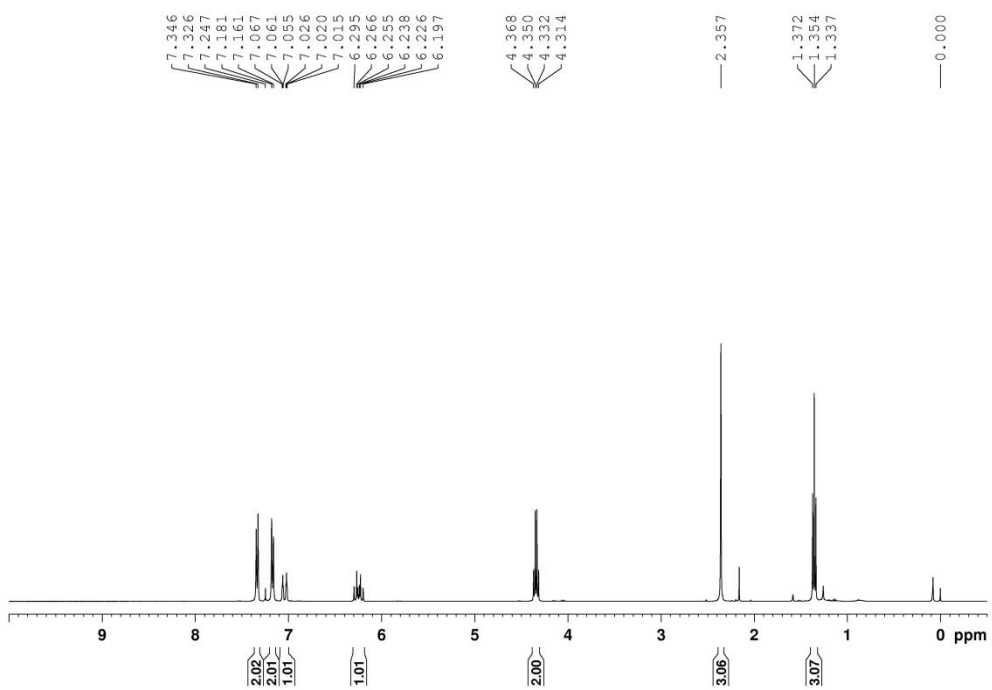



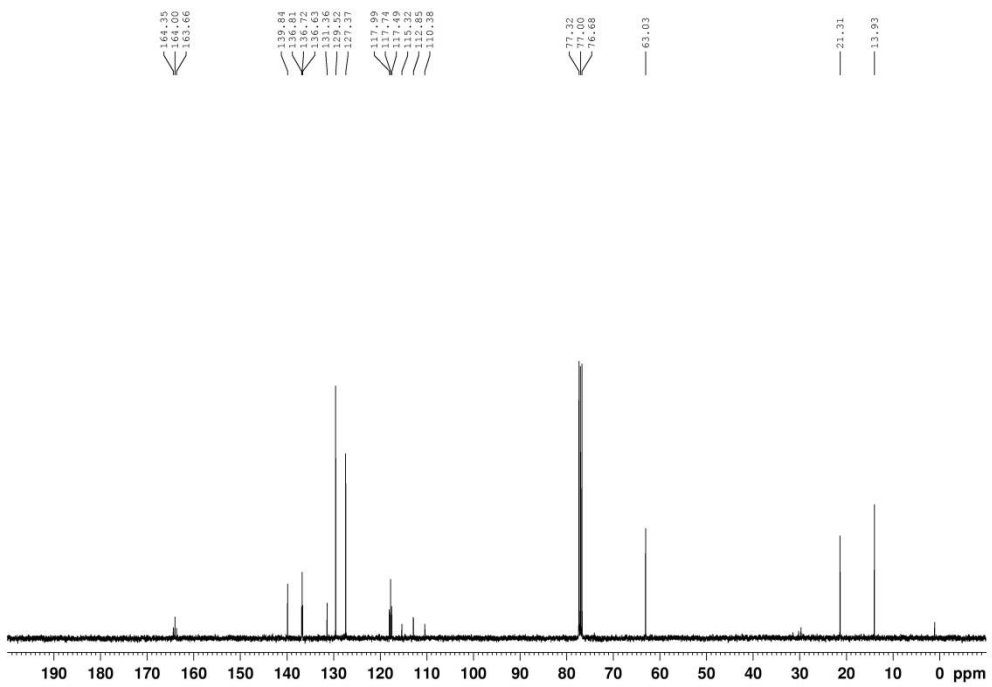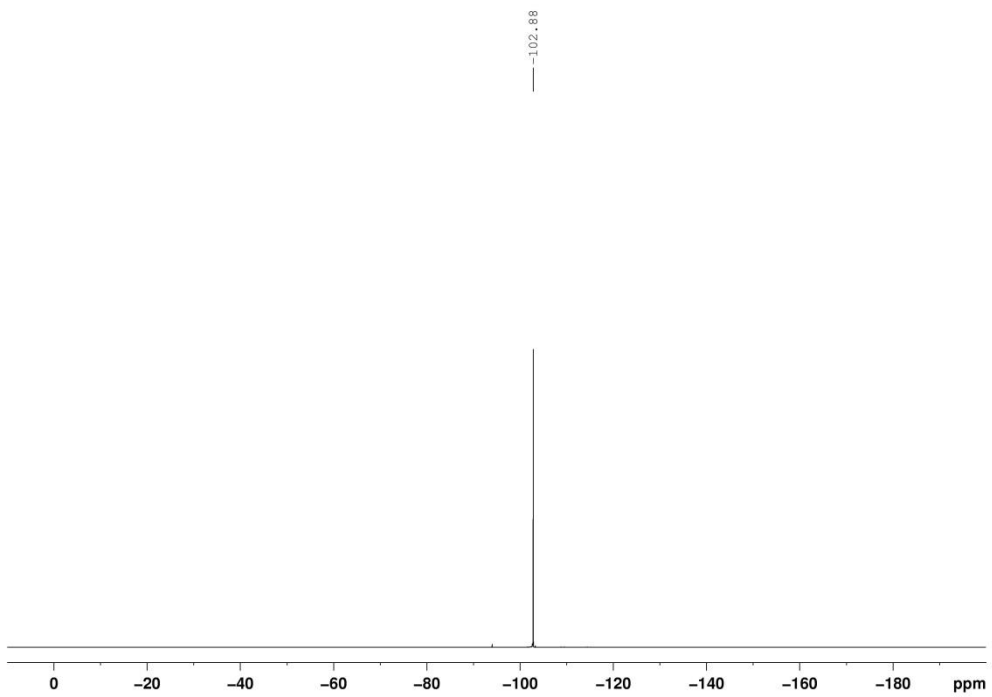

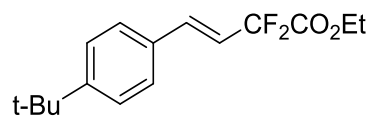

3e

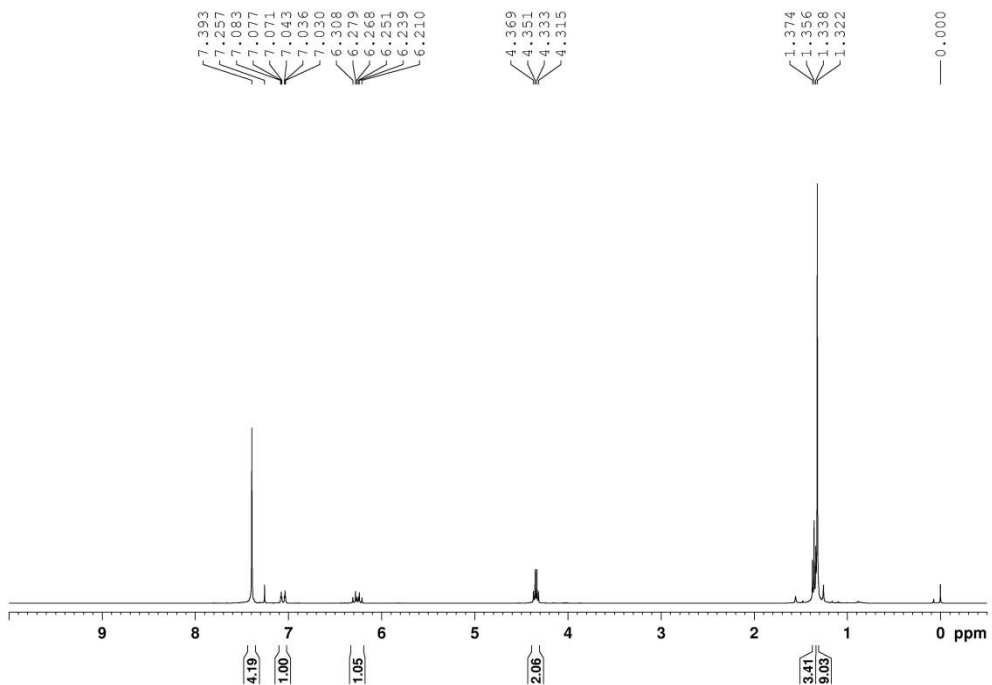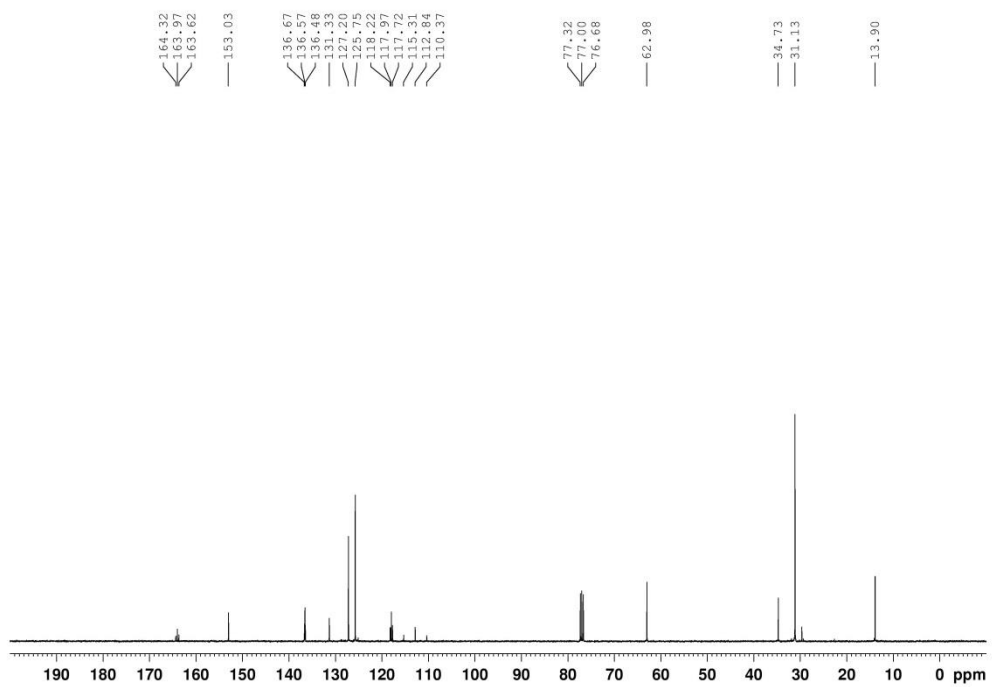

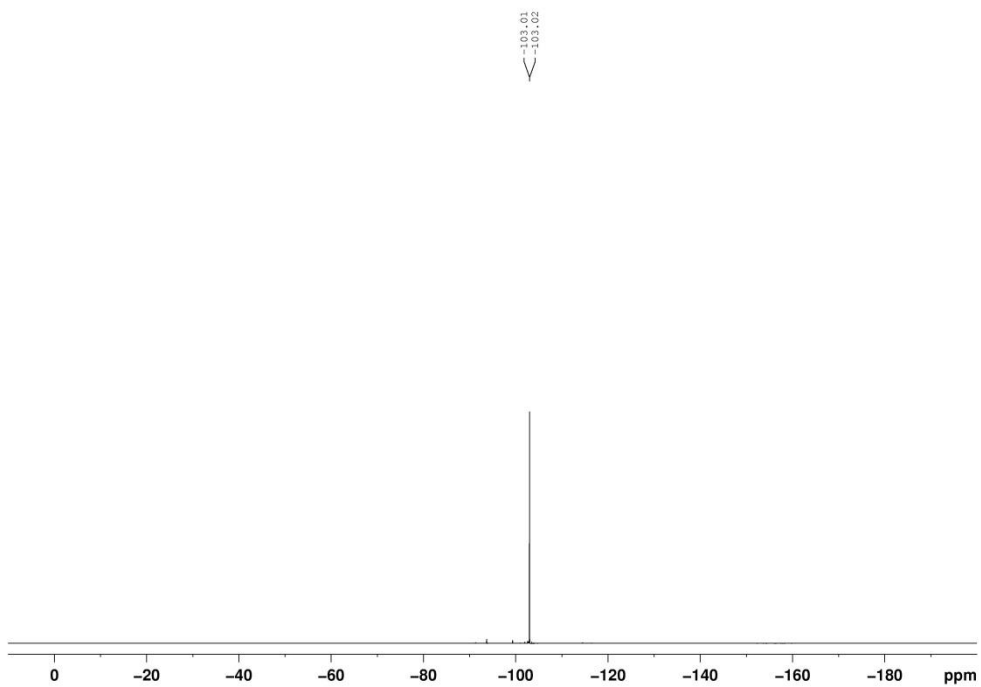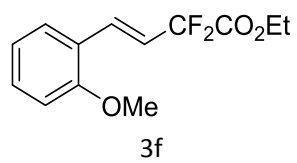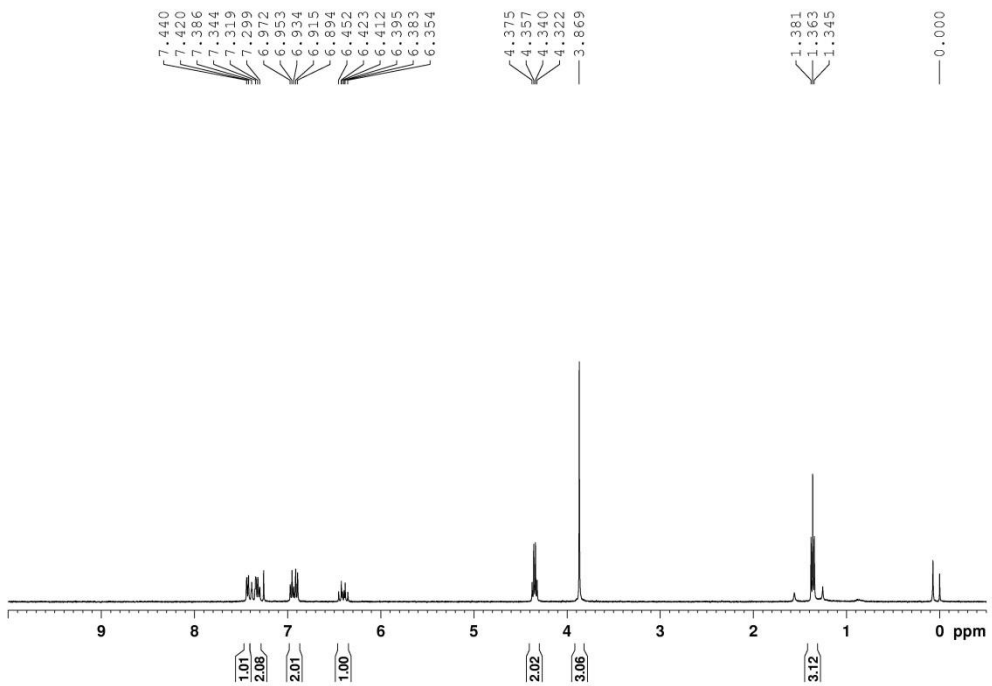

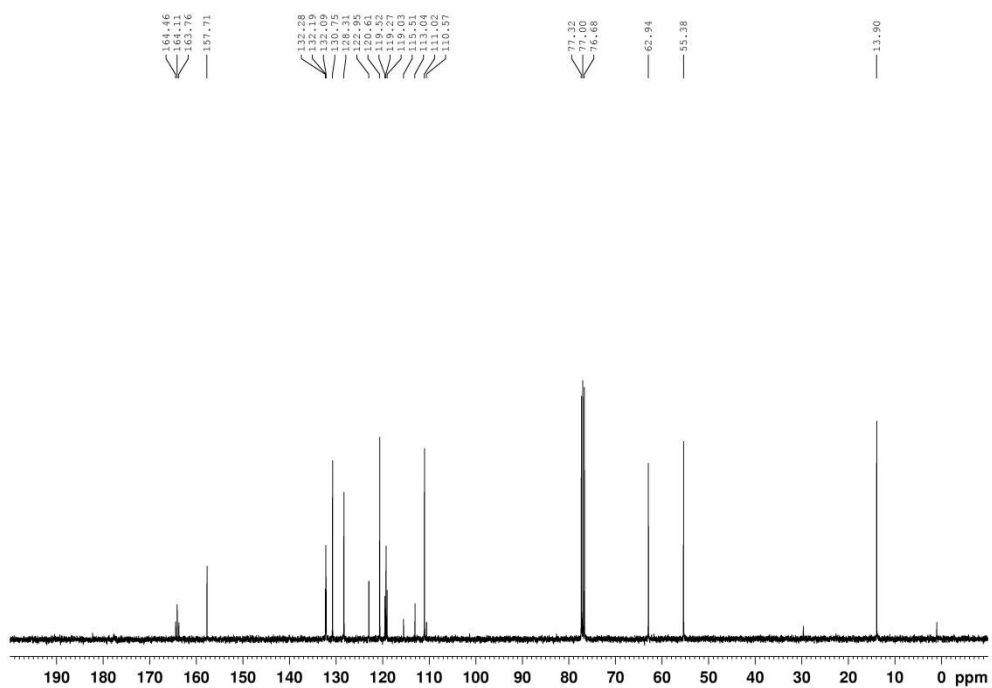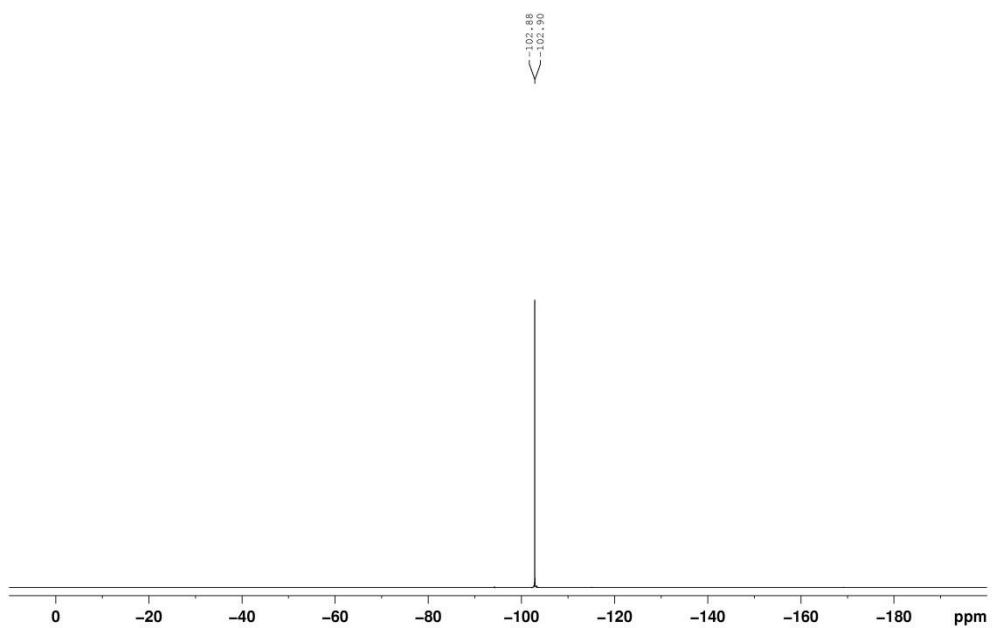

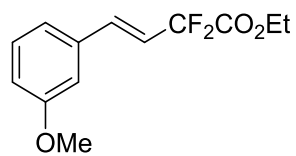

3g

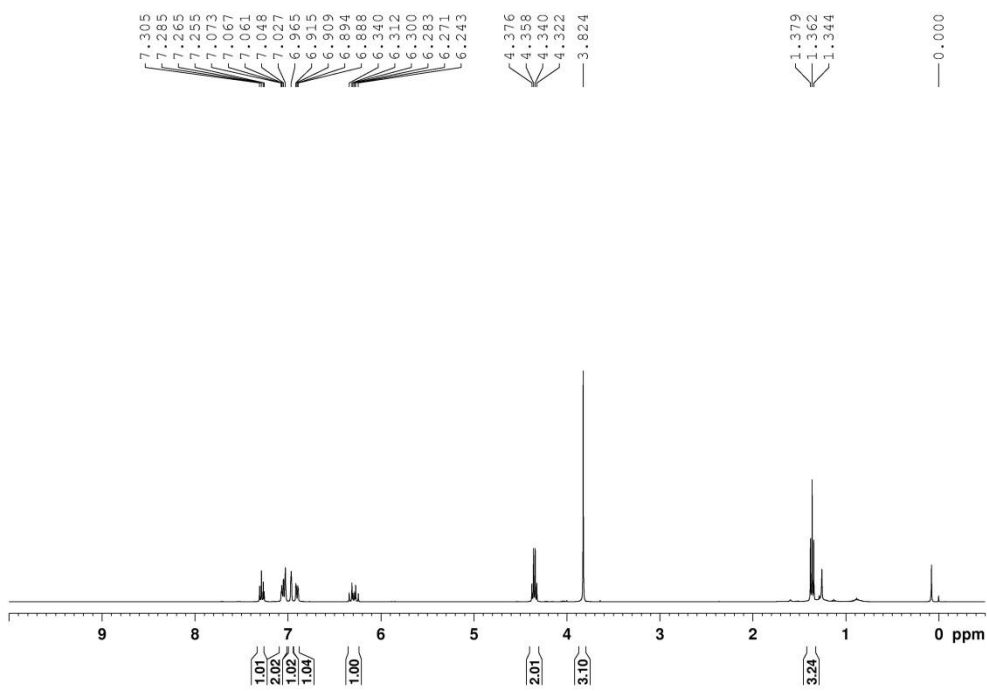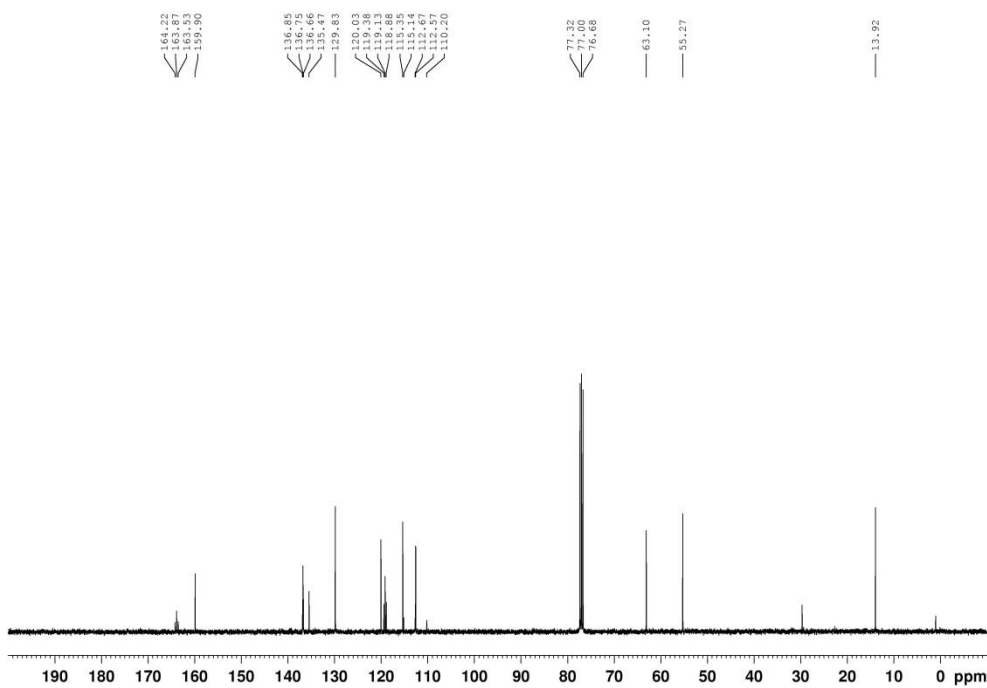

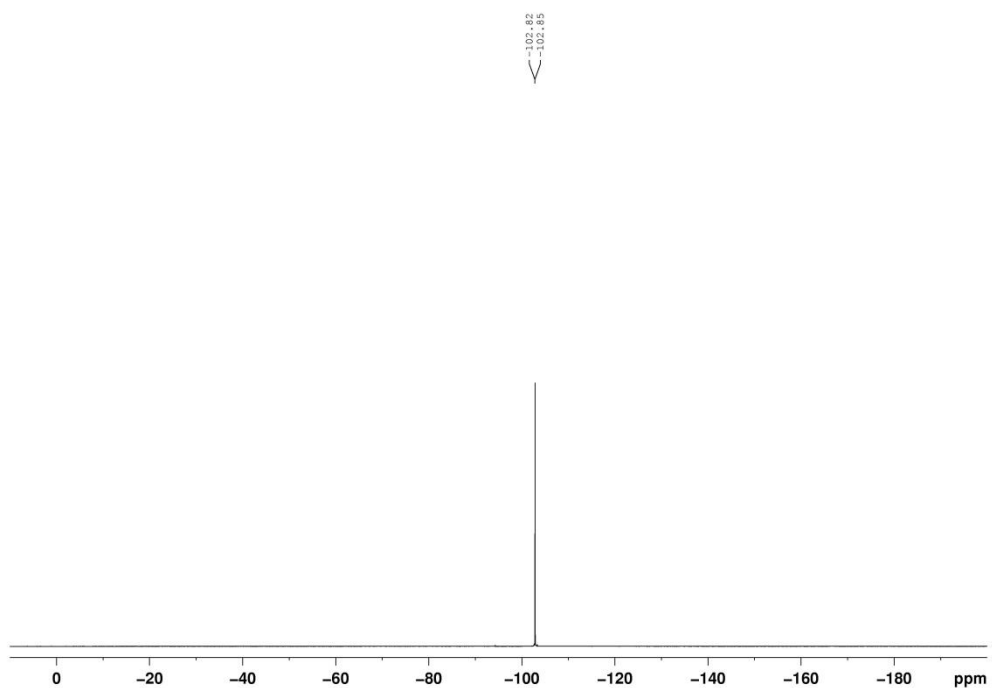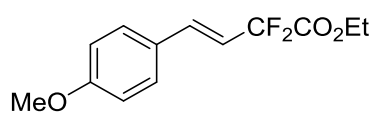

3h

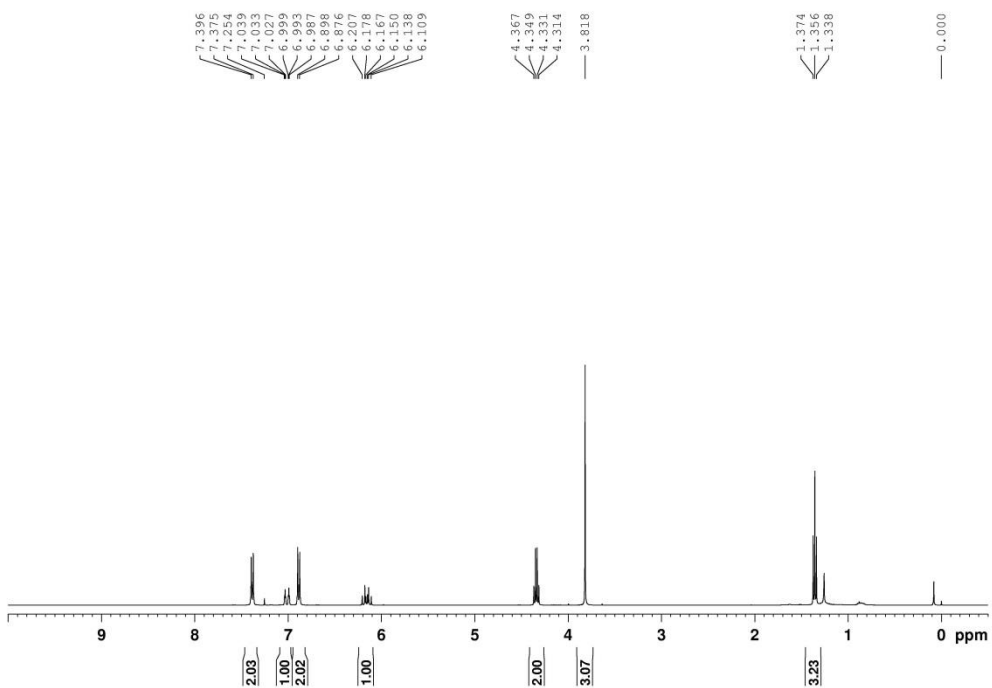

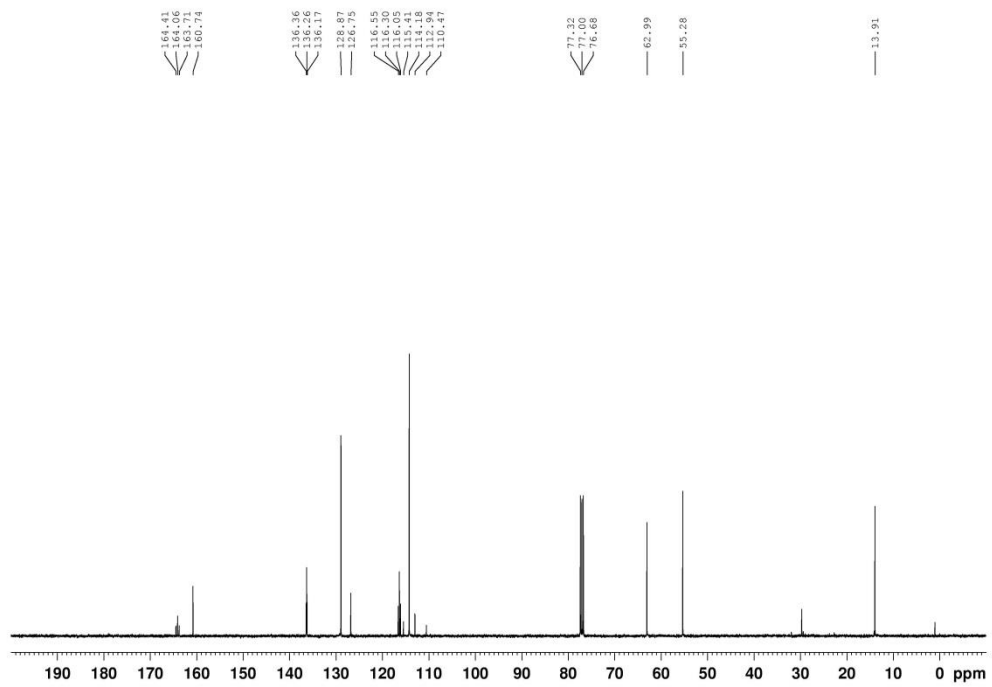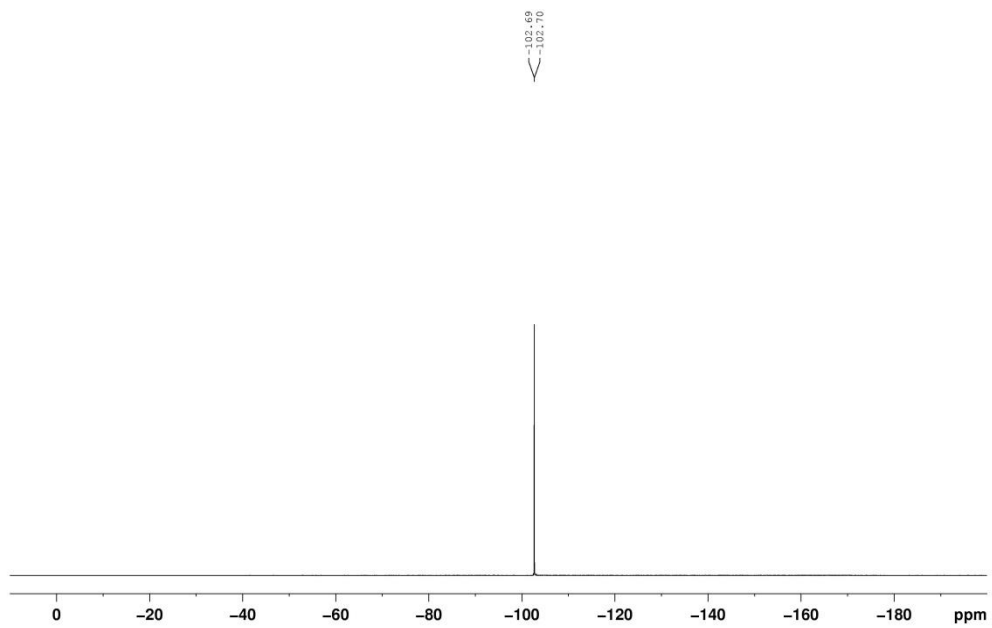

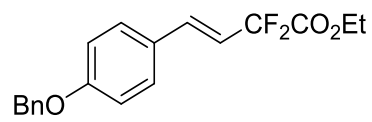

3i

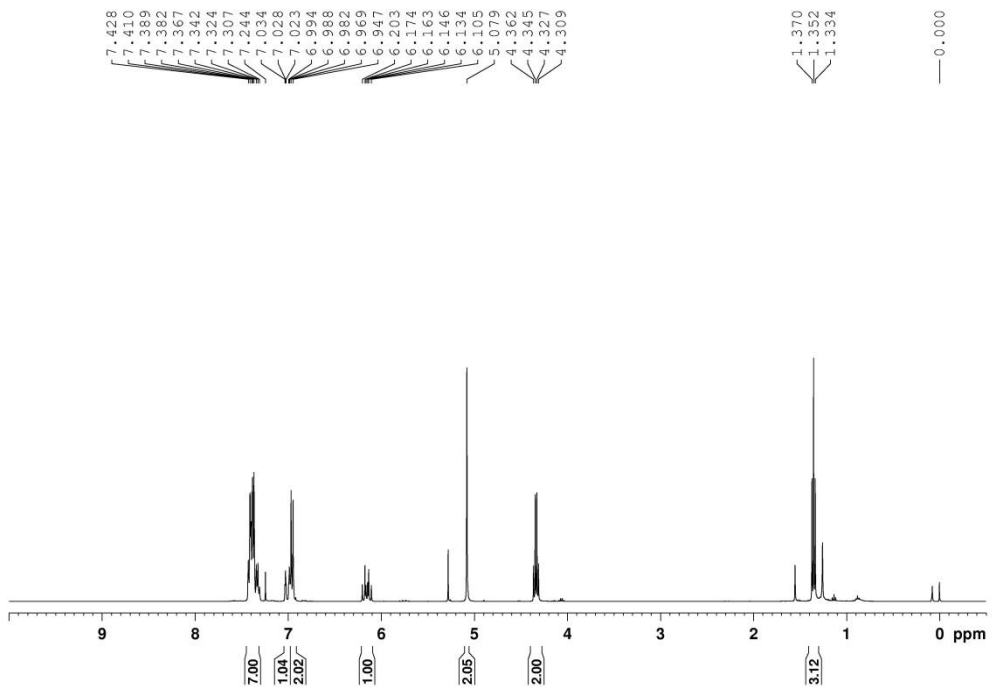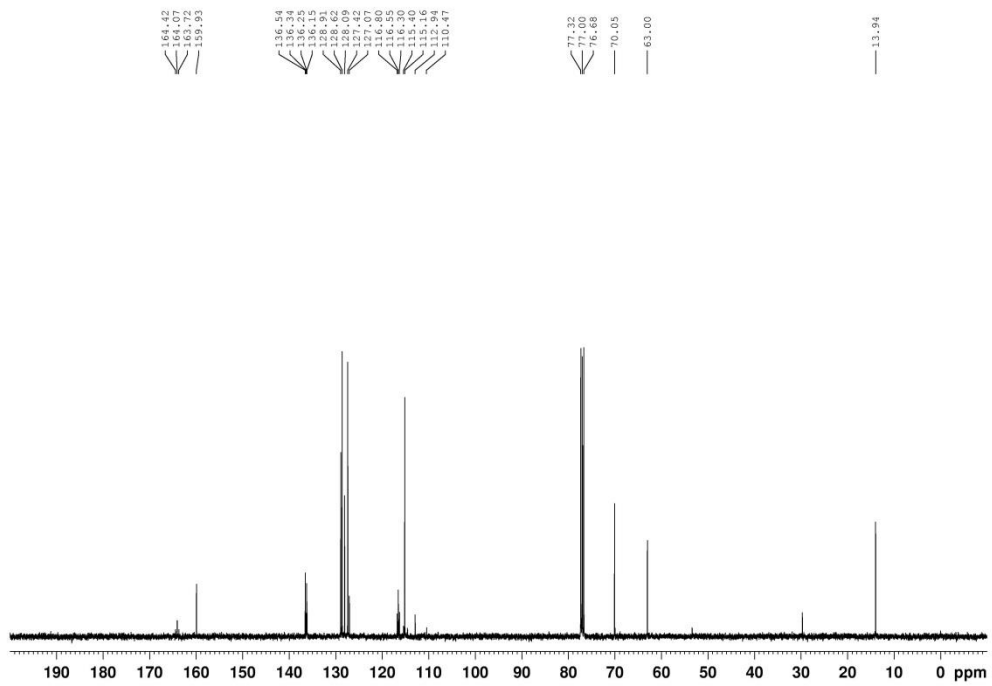



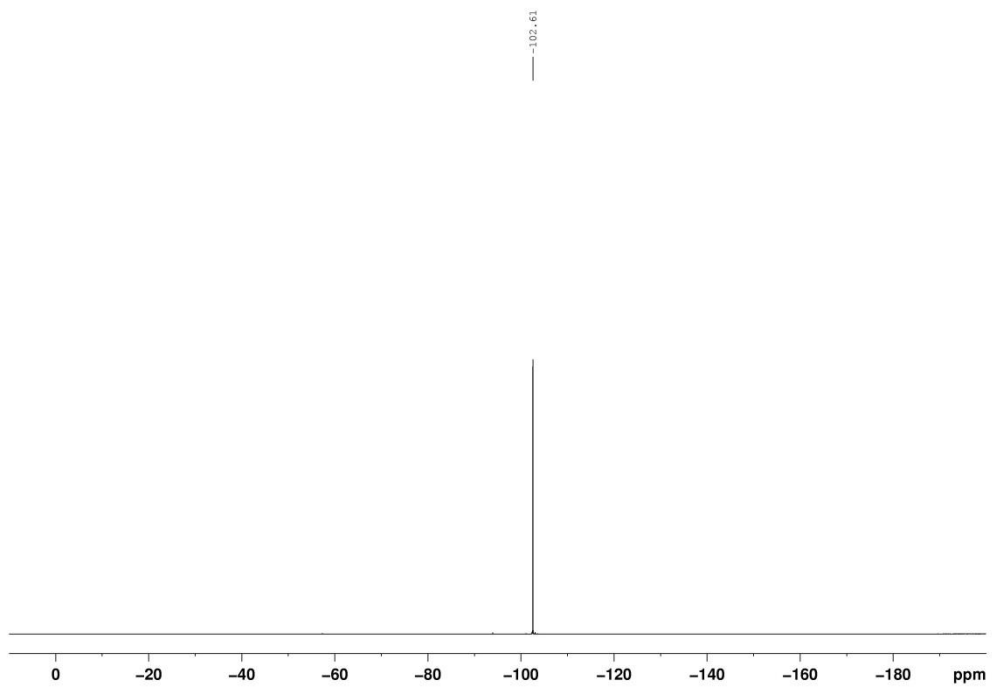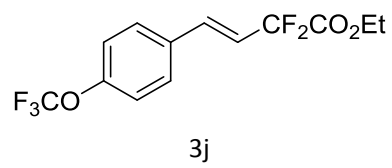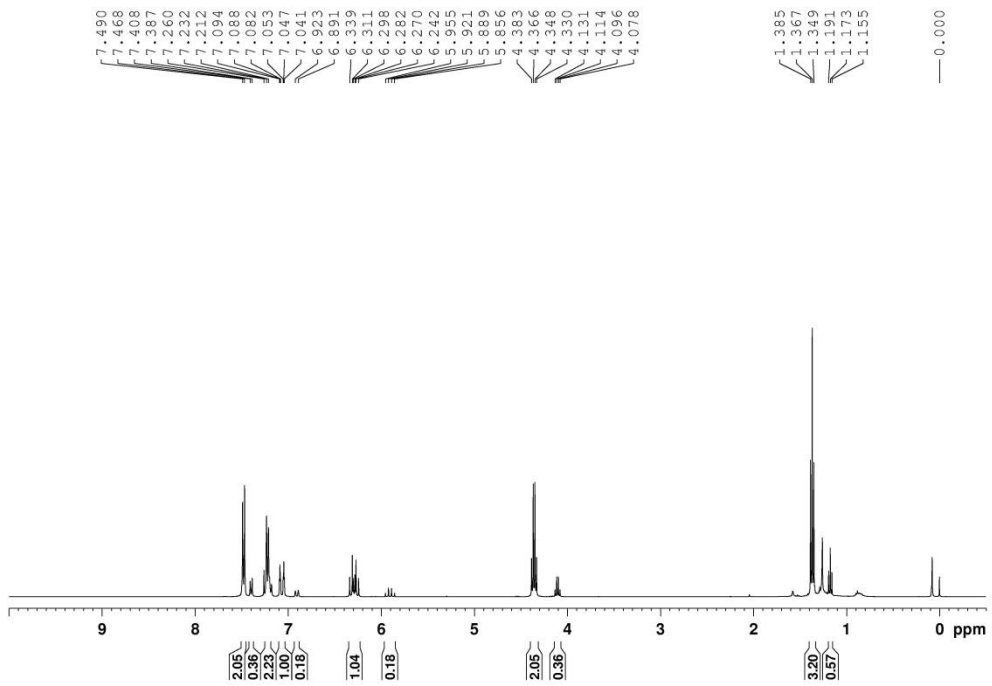

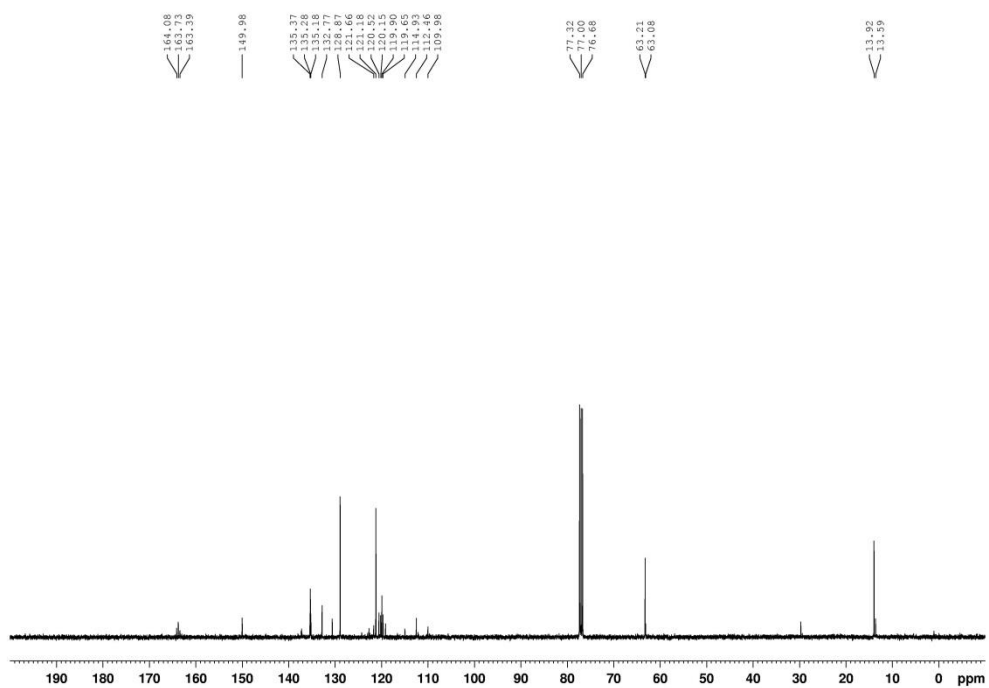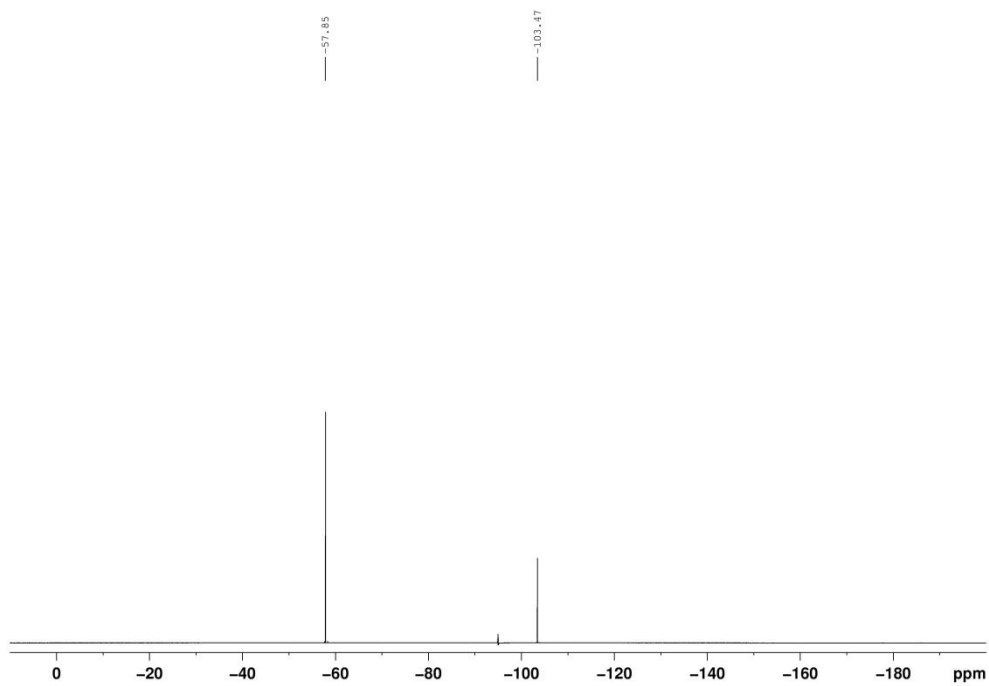

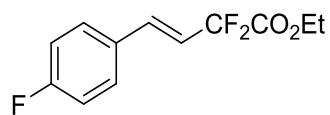

3k

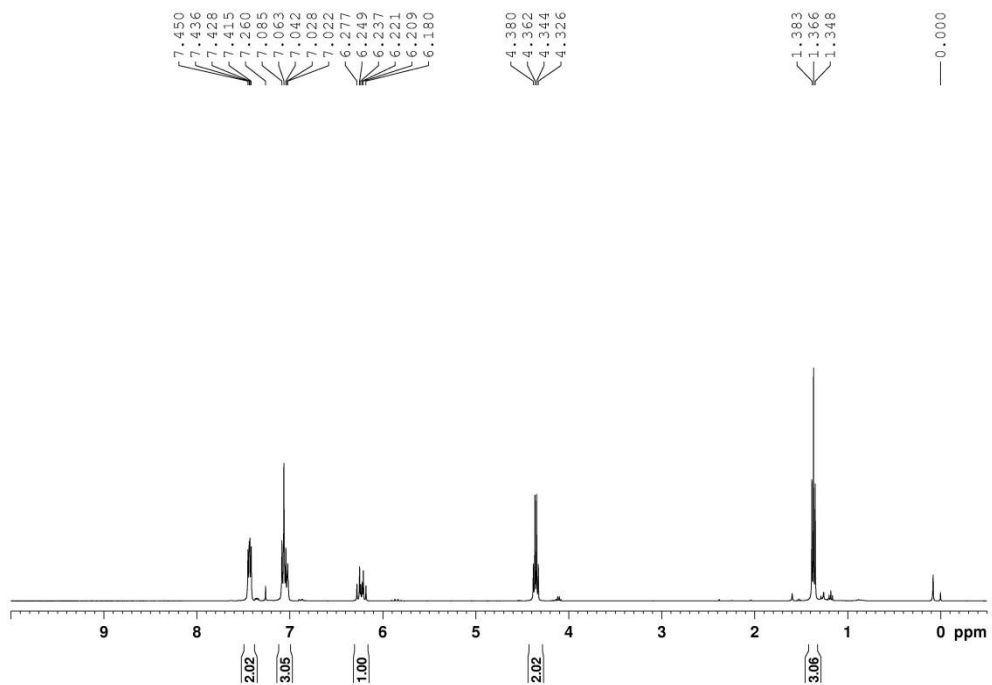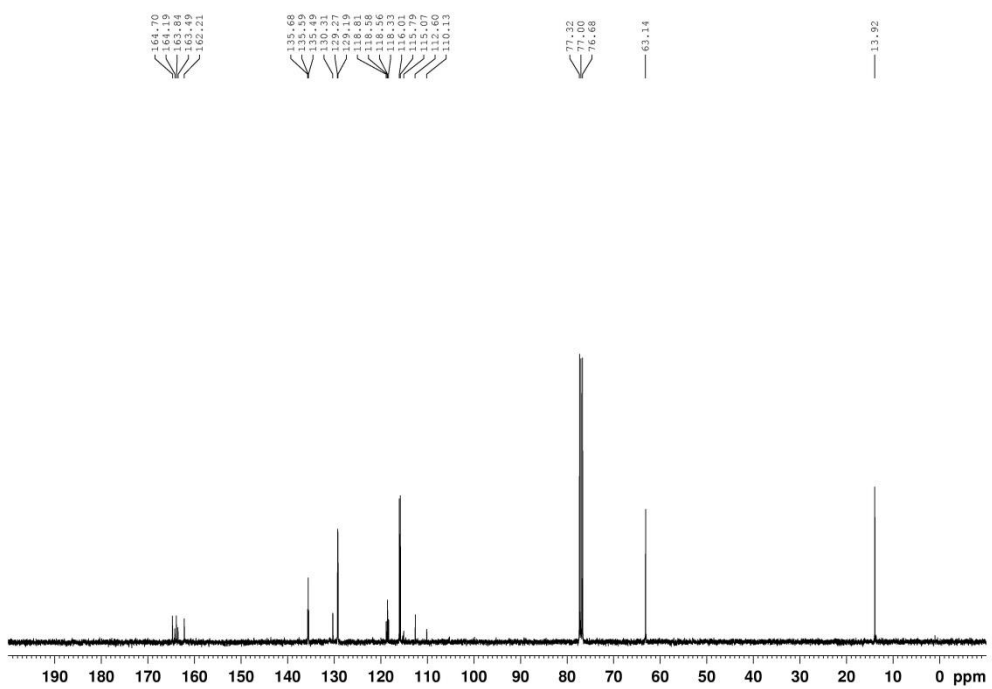

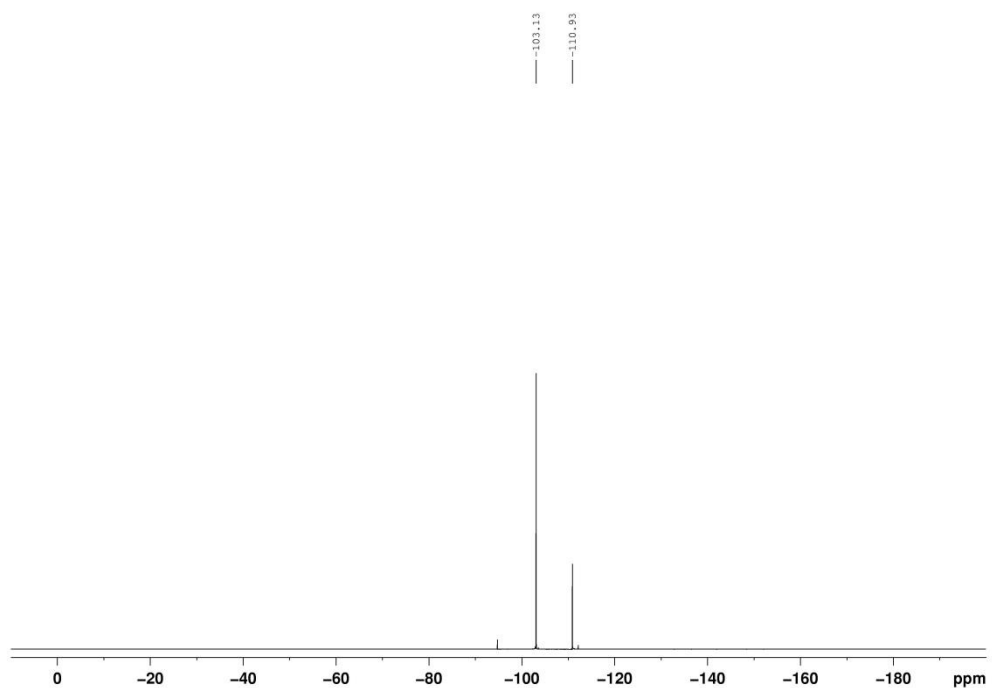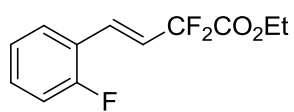

3I

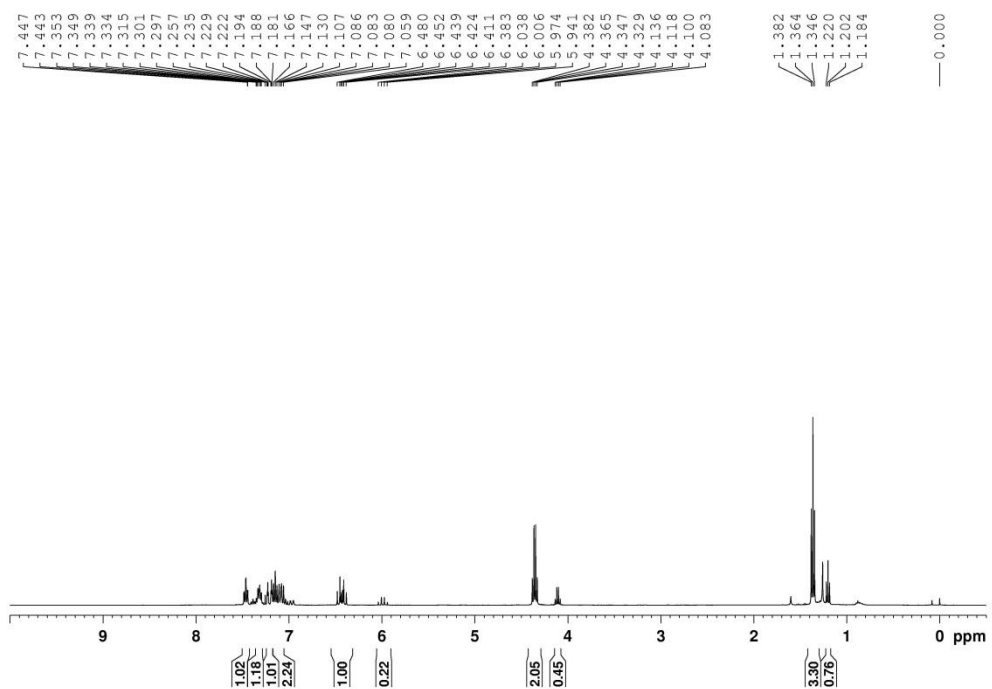

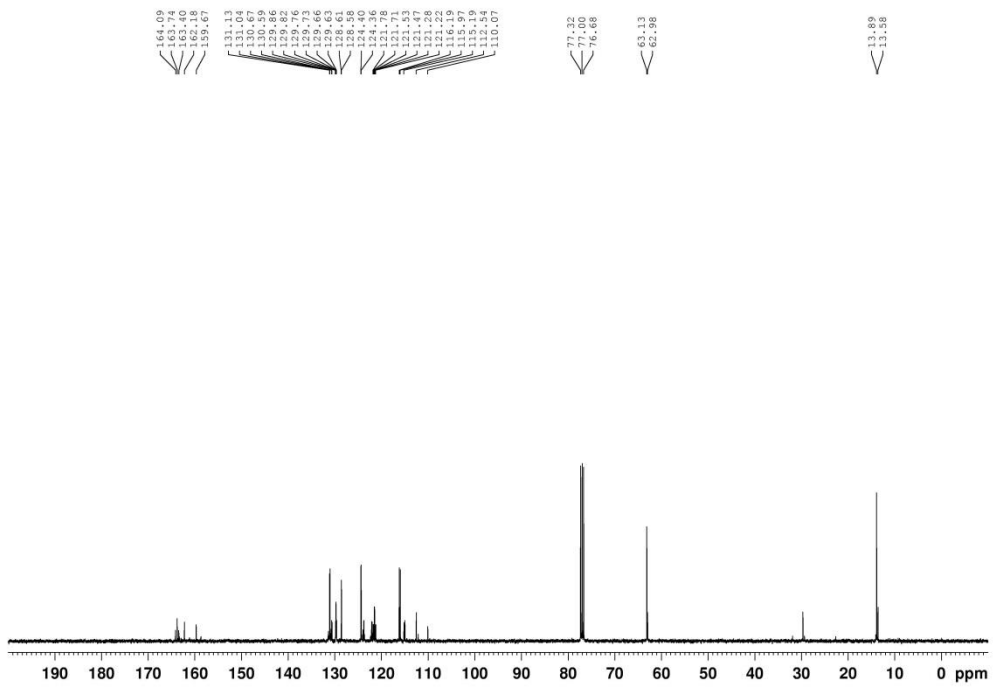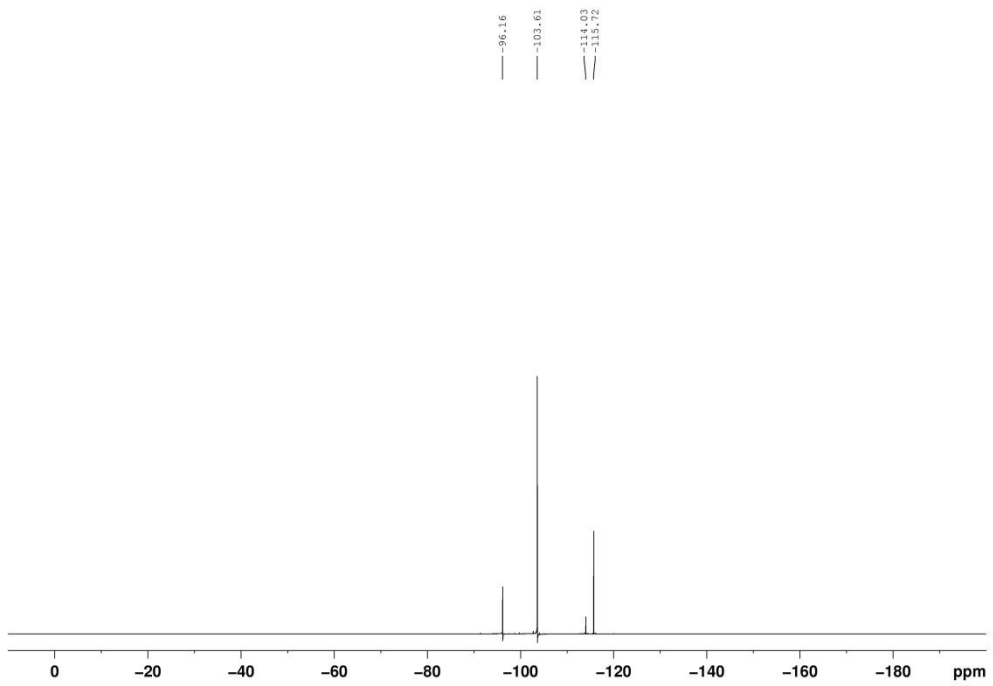

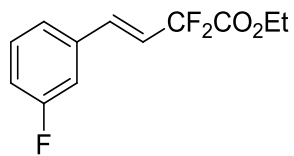

3m

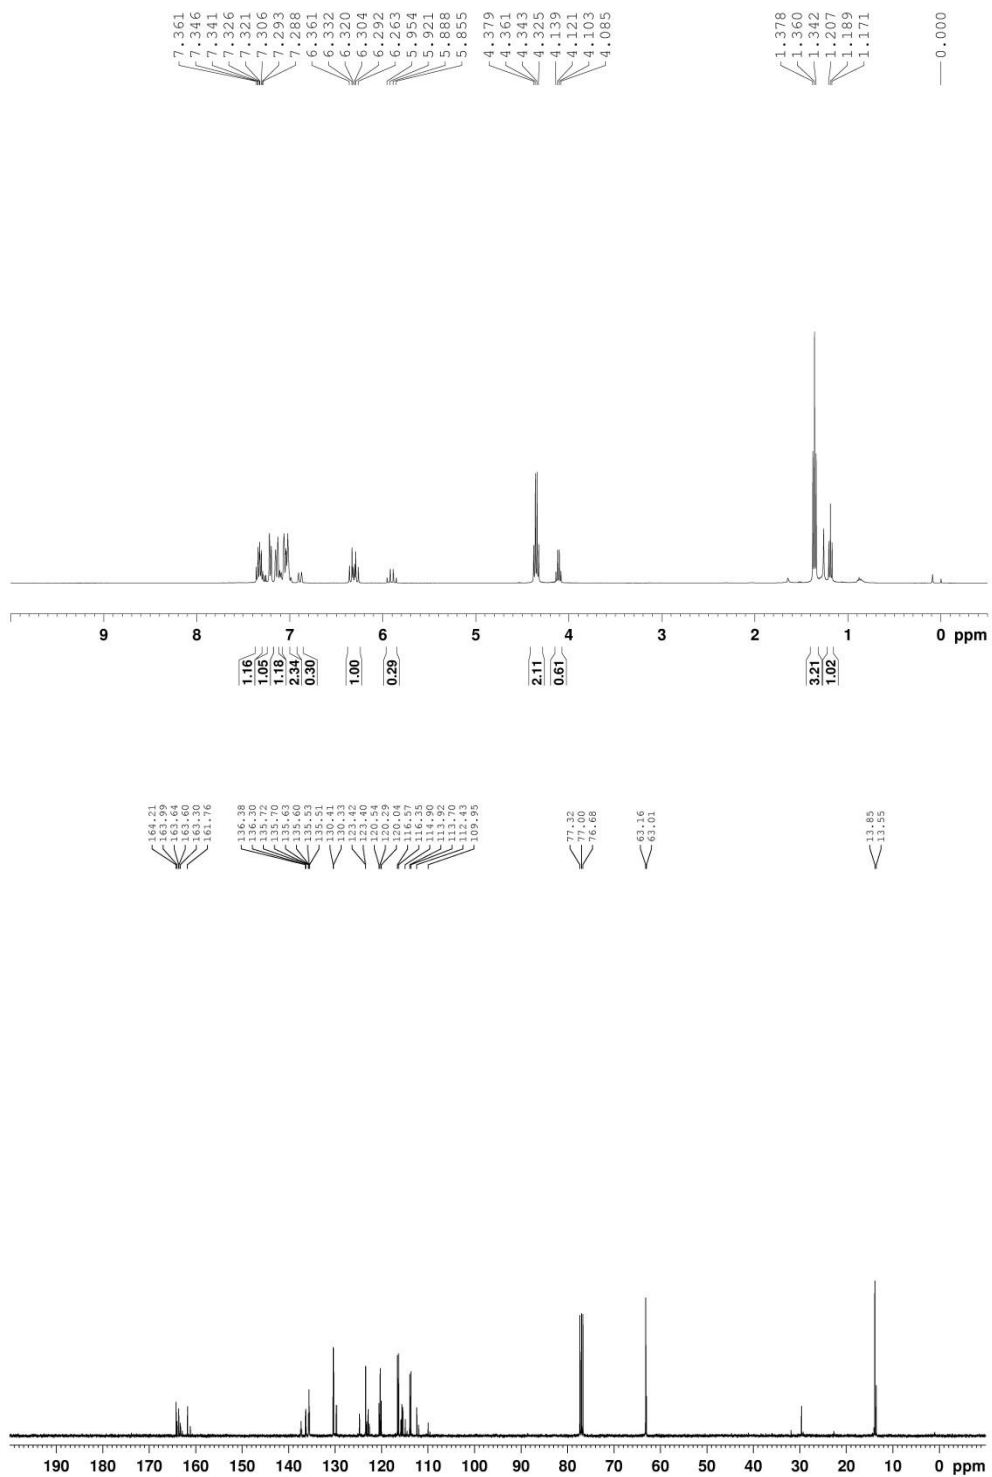

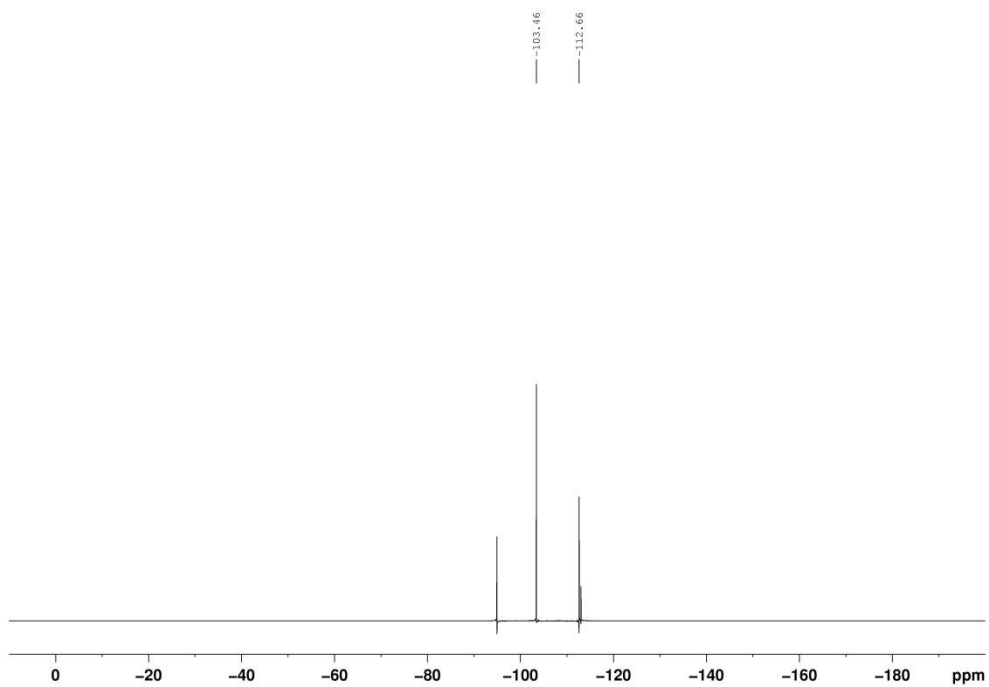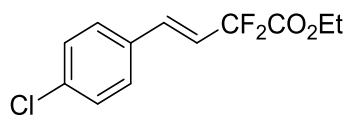

3n

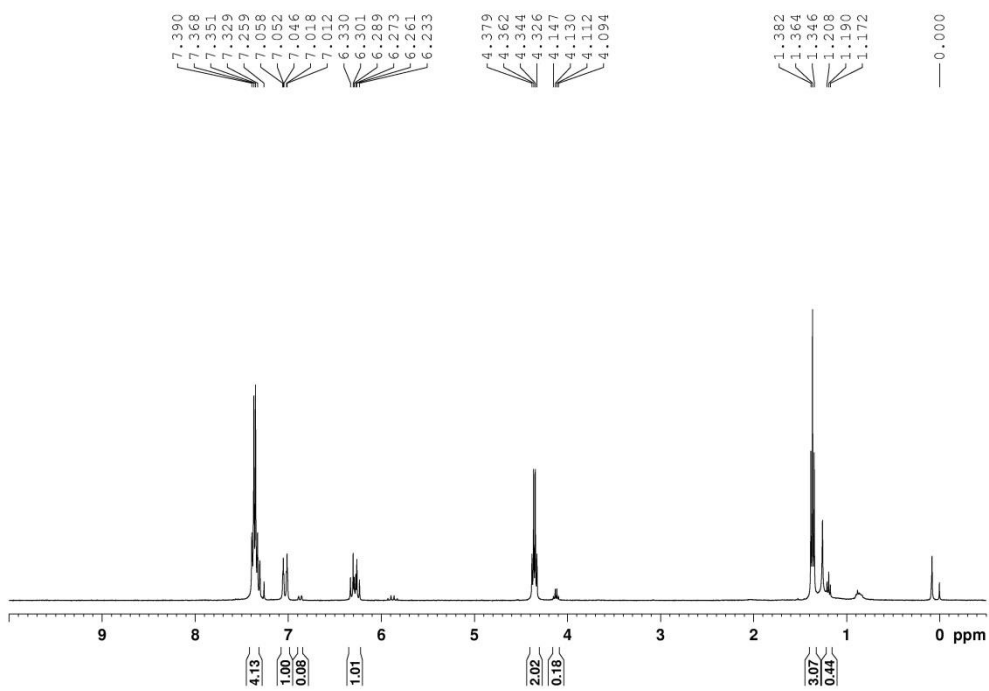

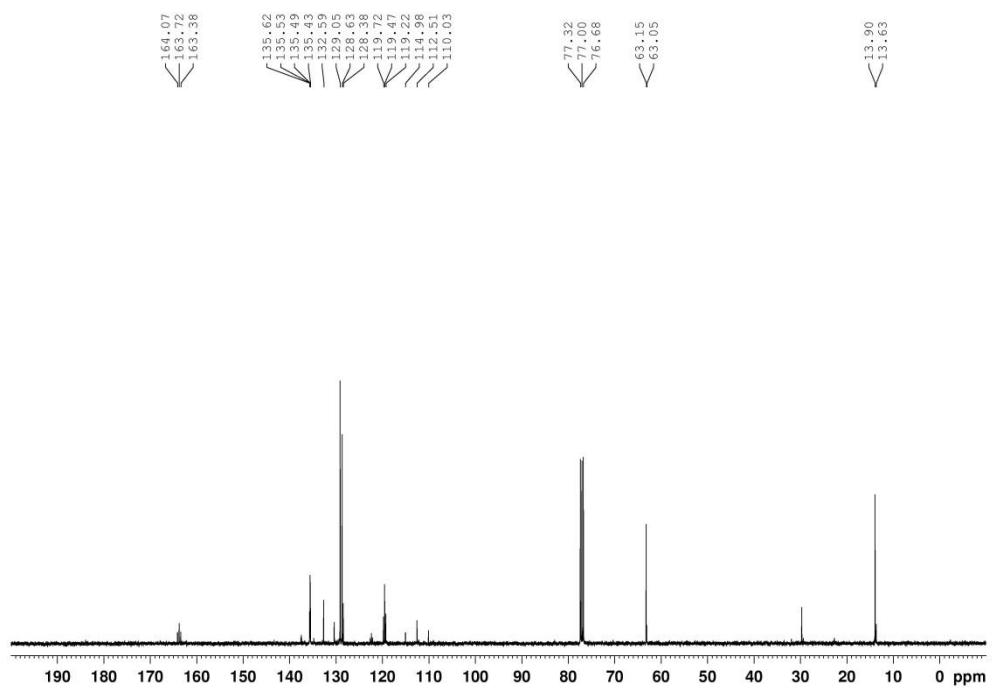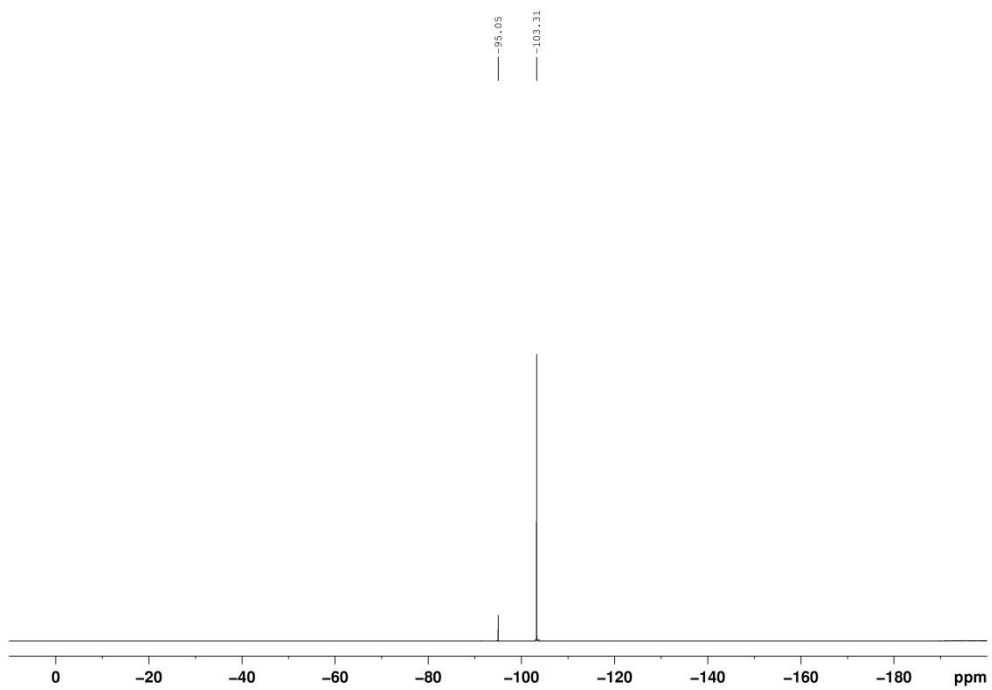



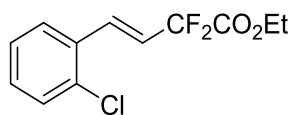

30

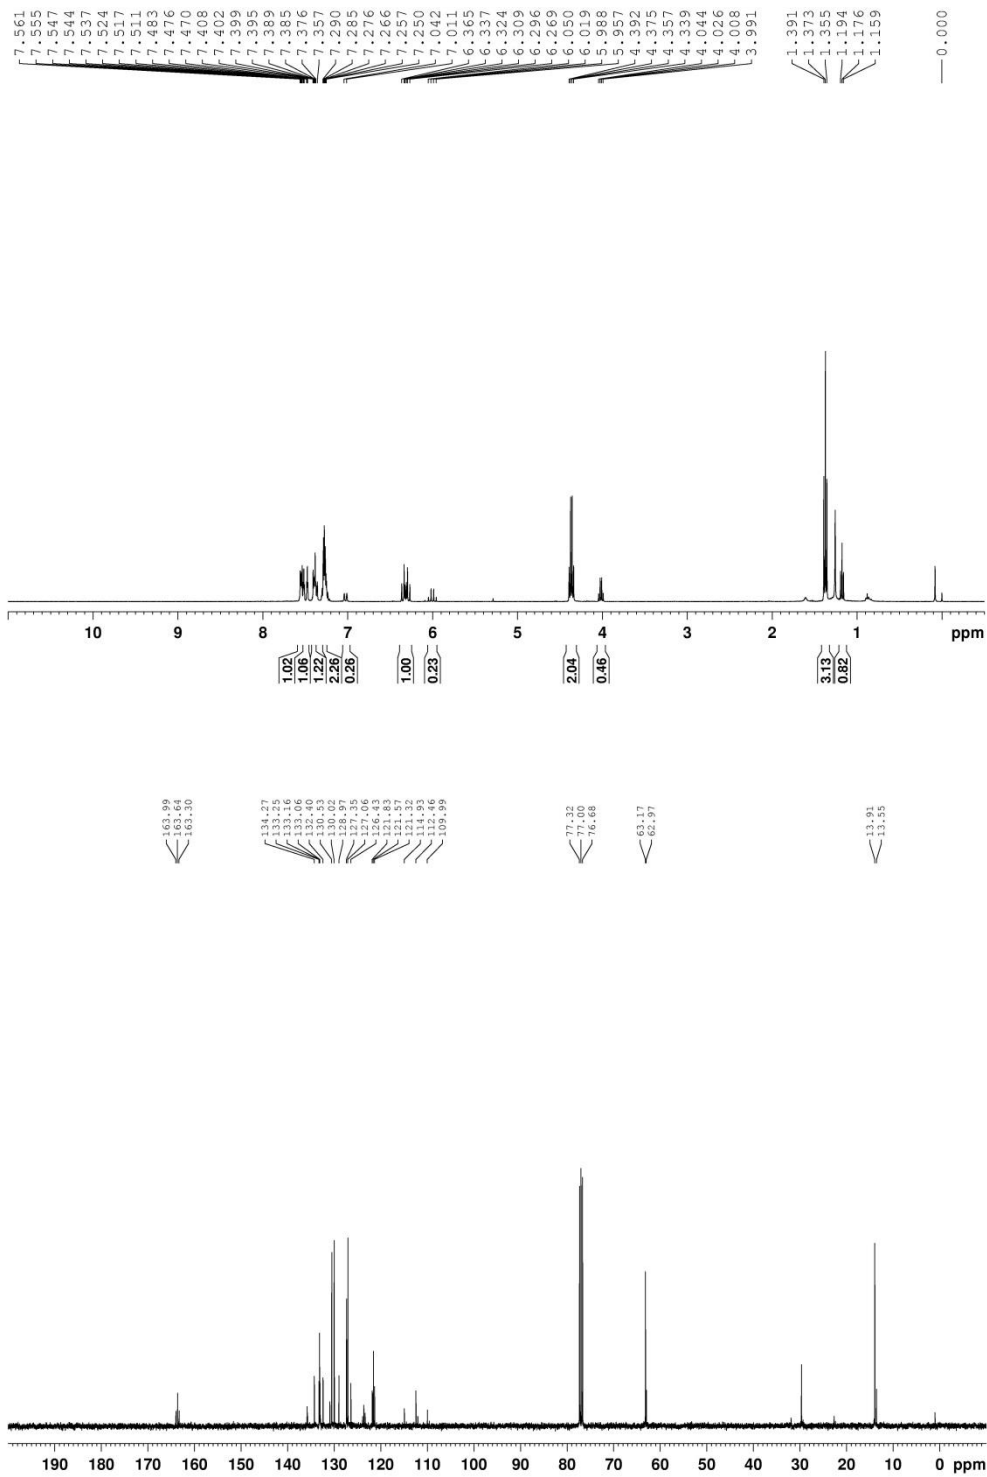

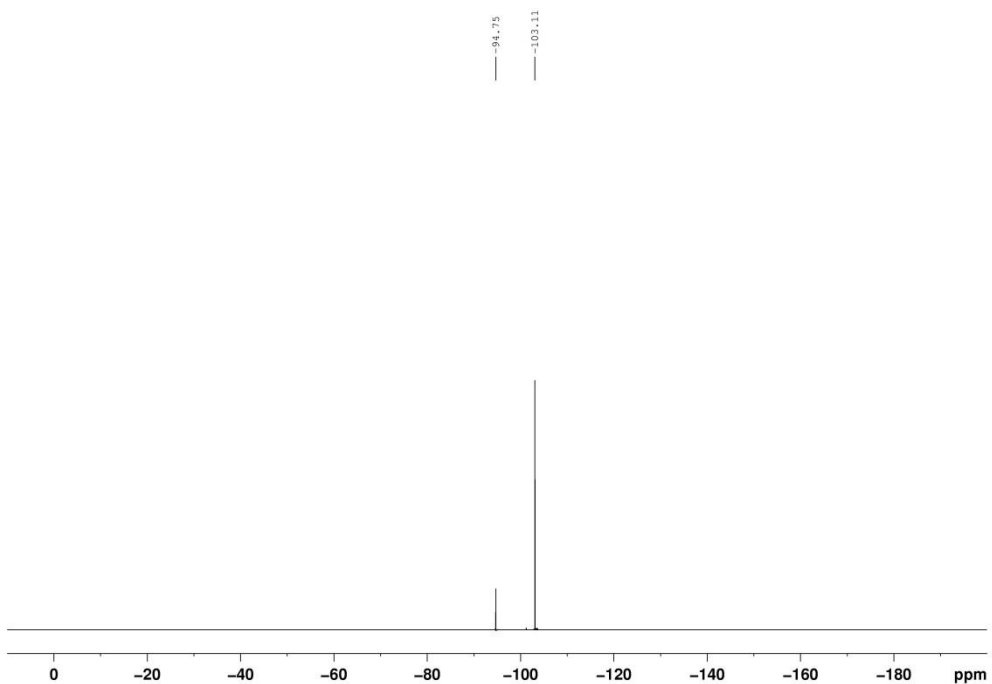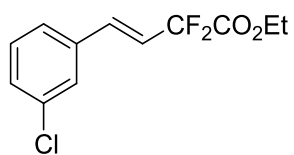

3p

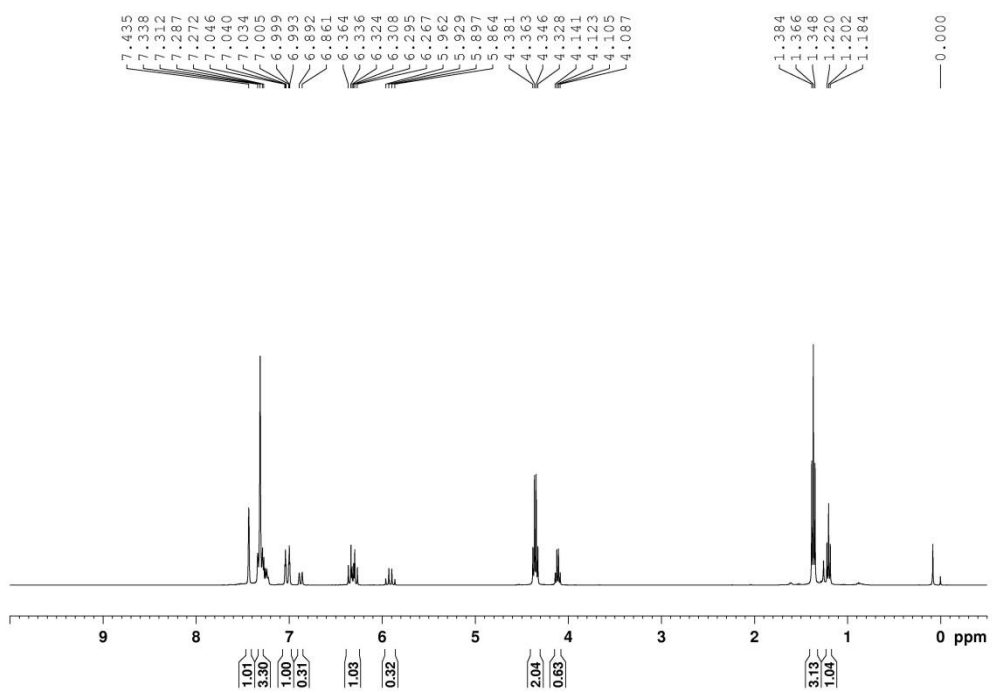

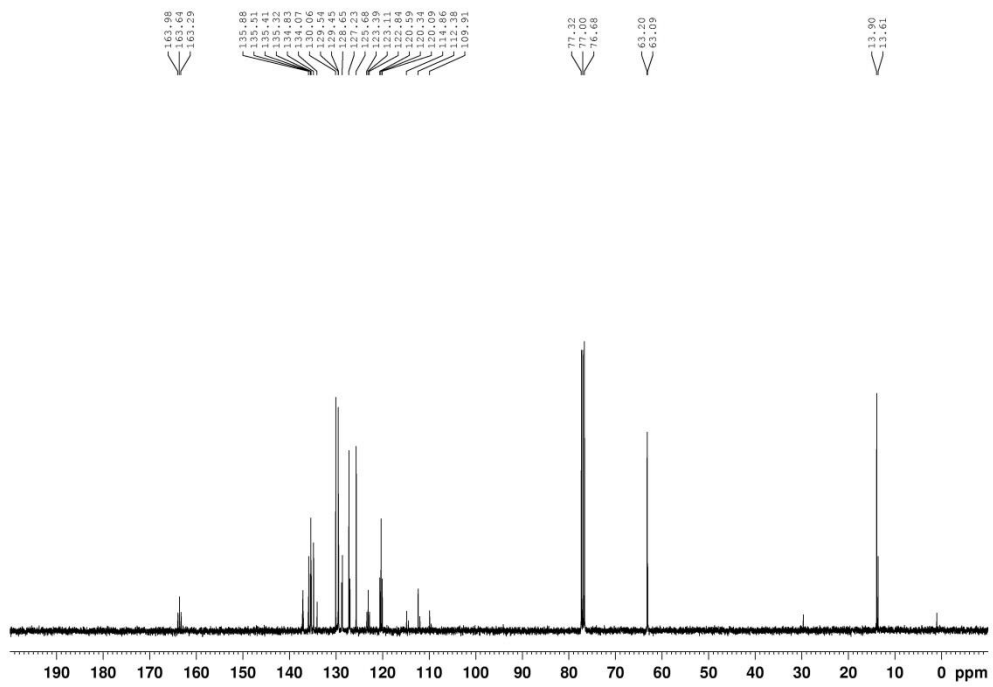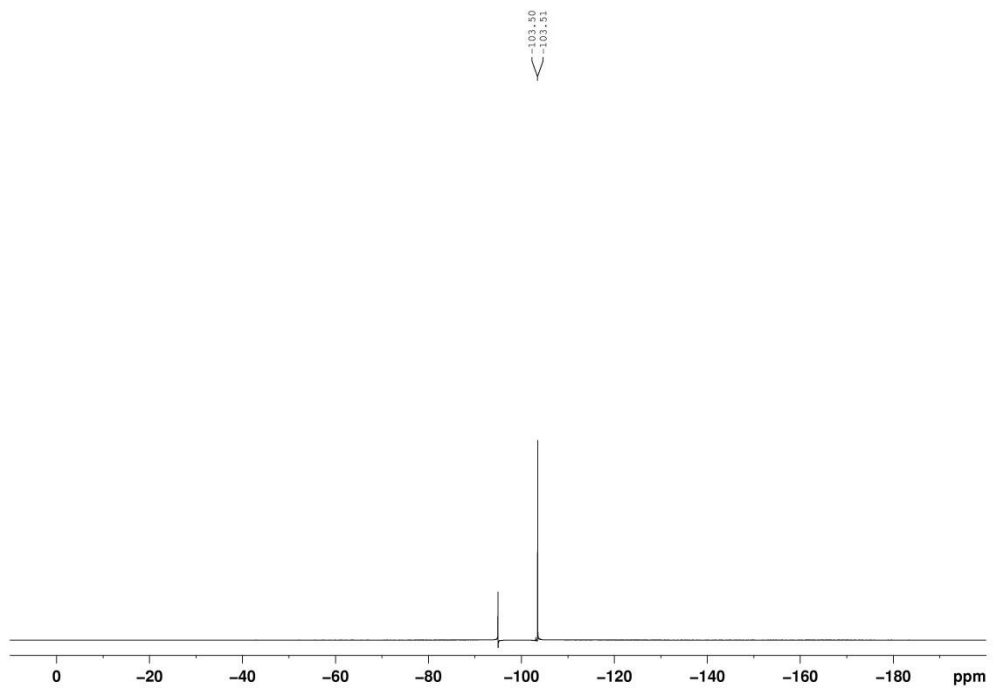

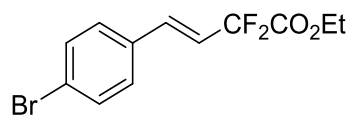

3q

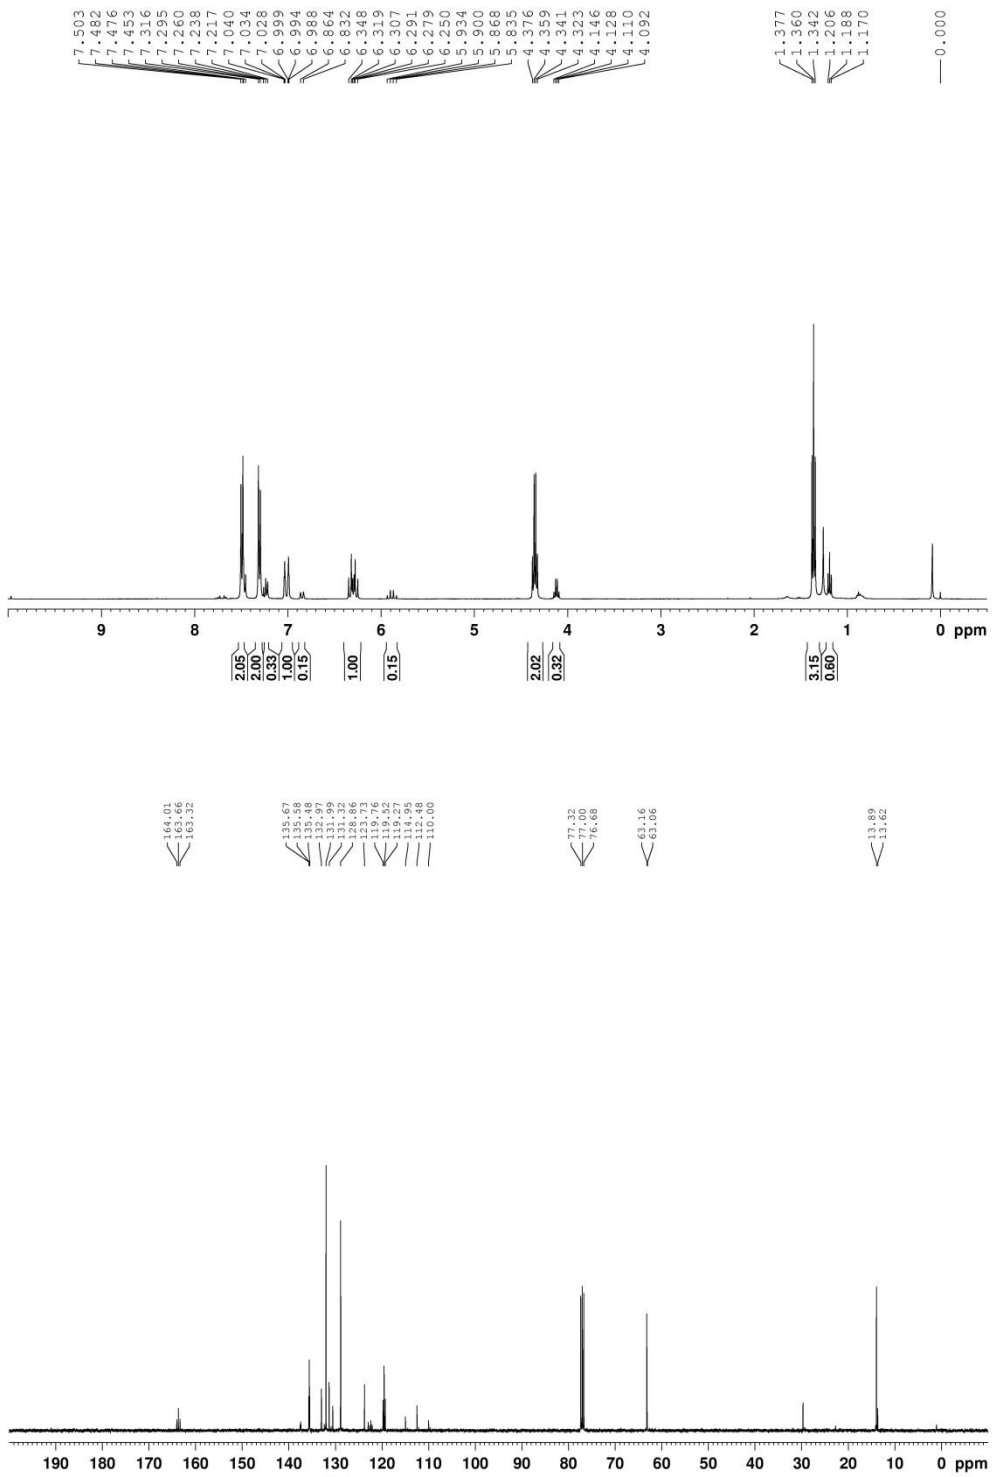

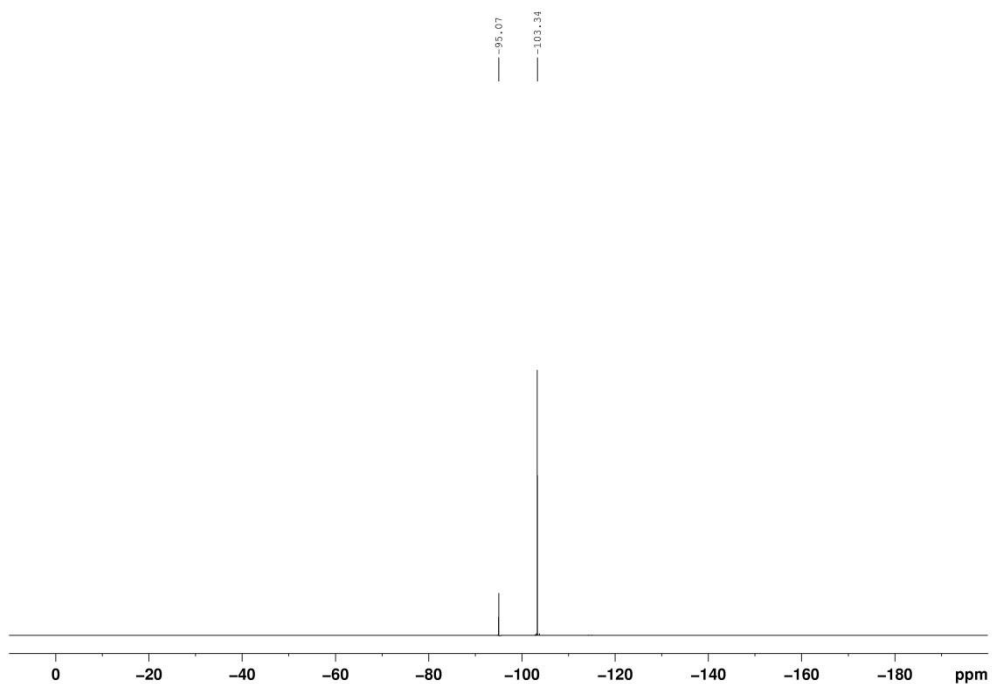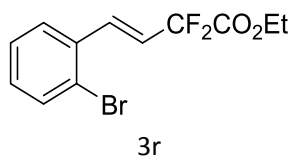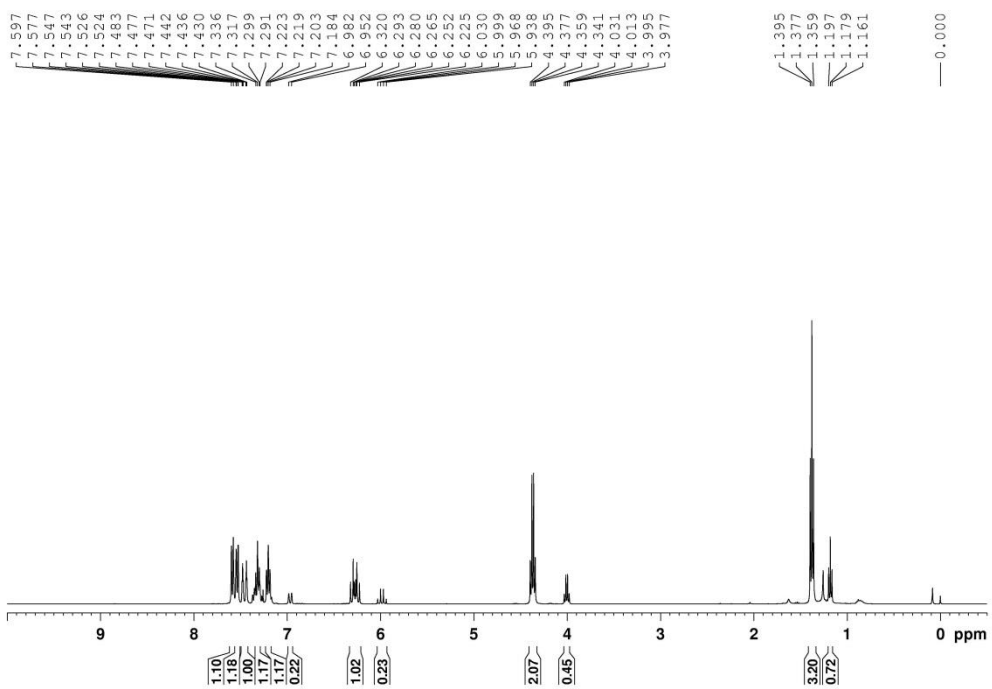

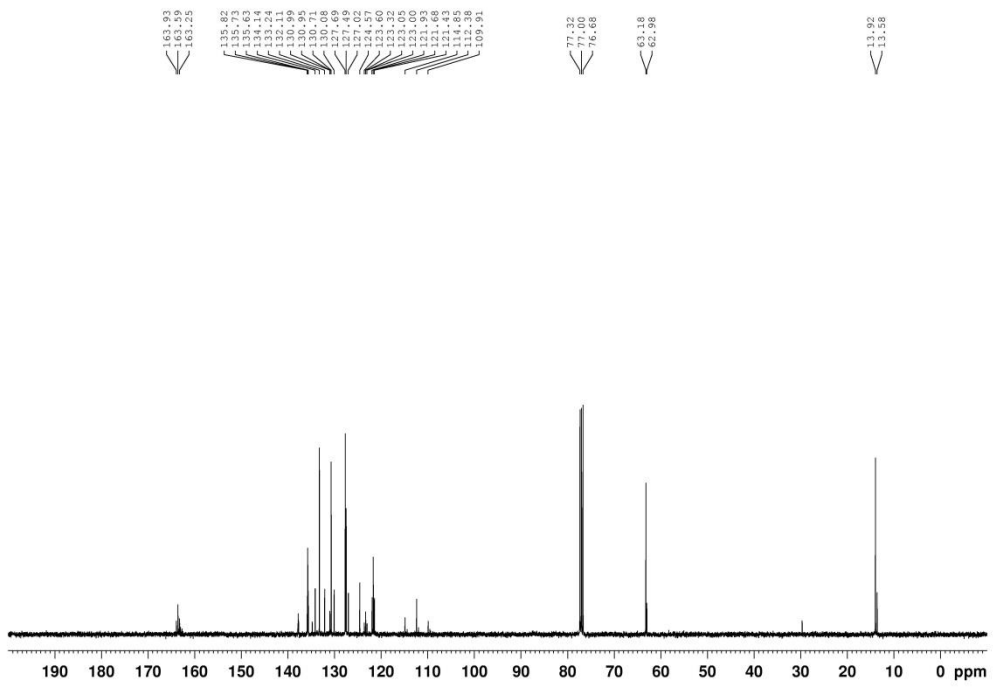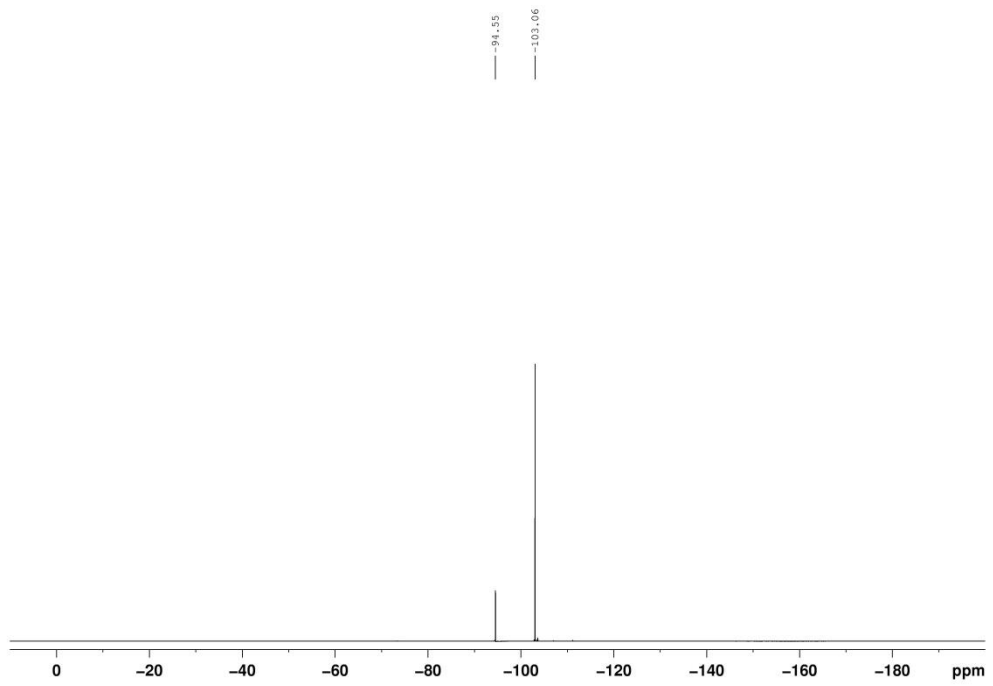

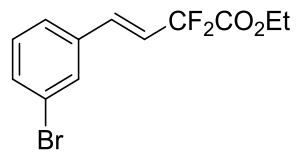

3s

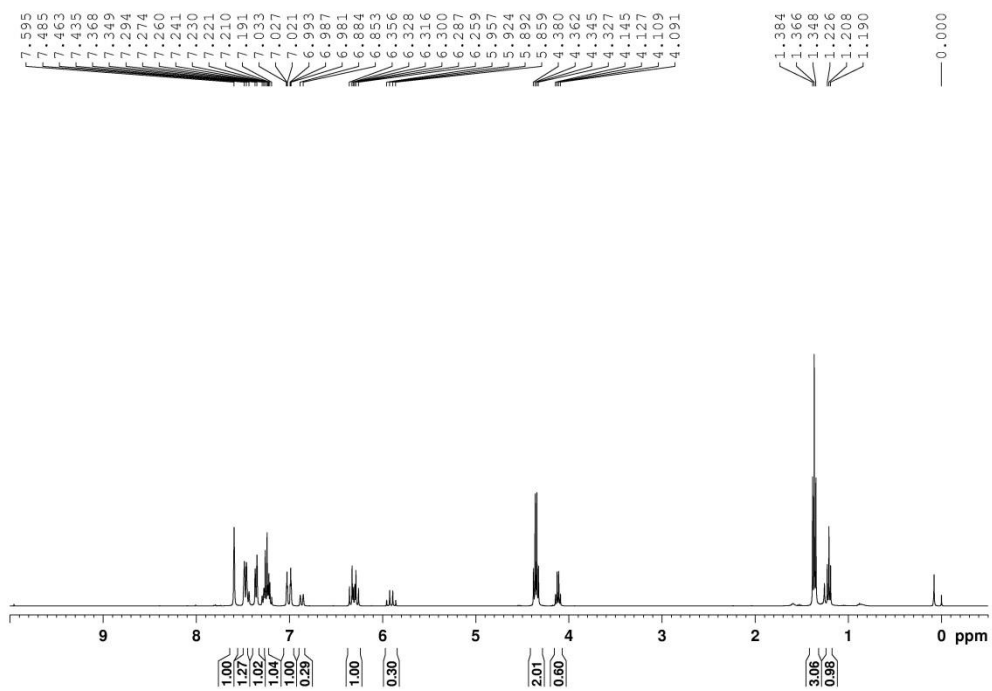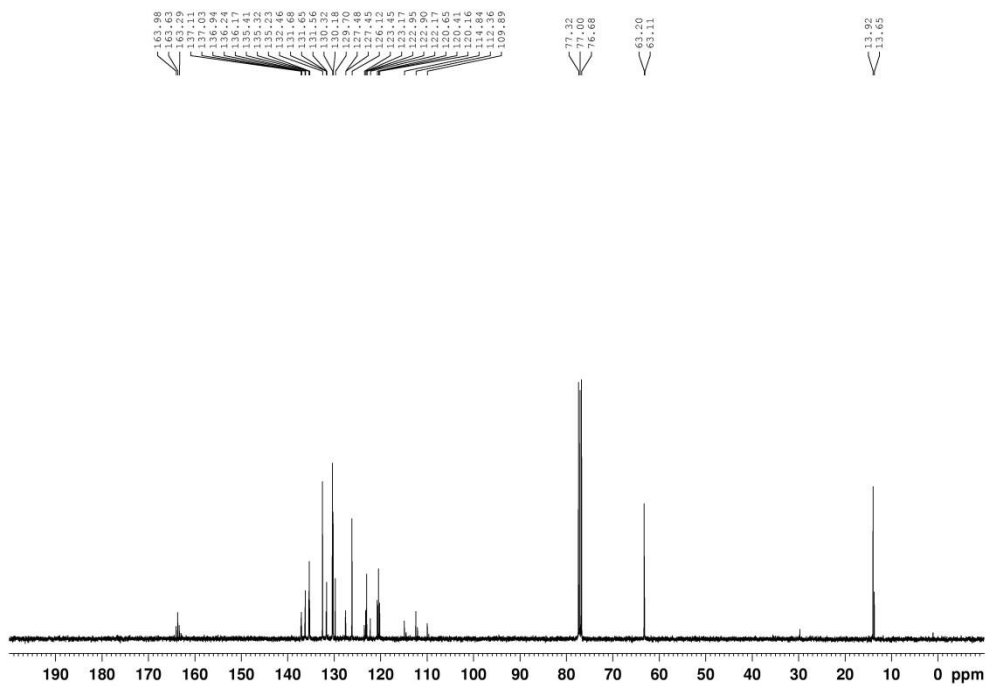

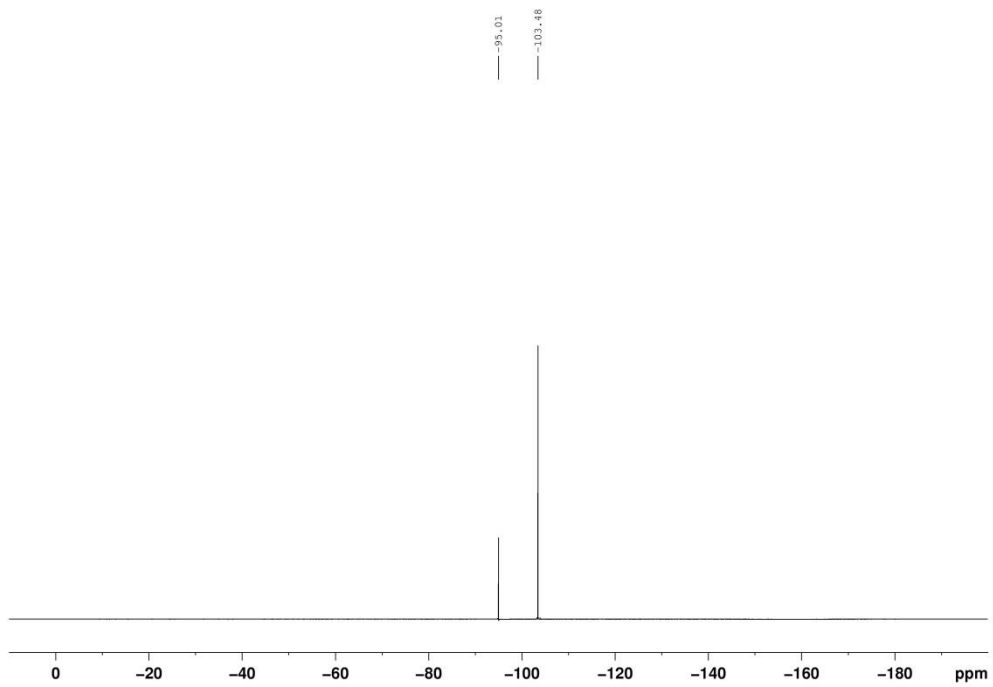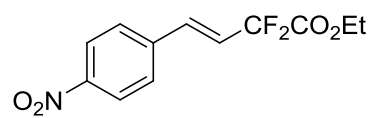

3t

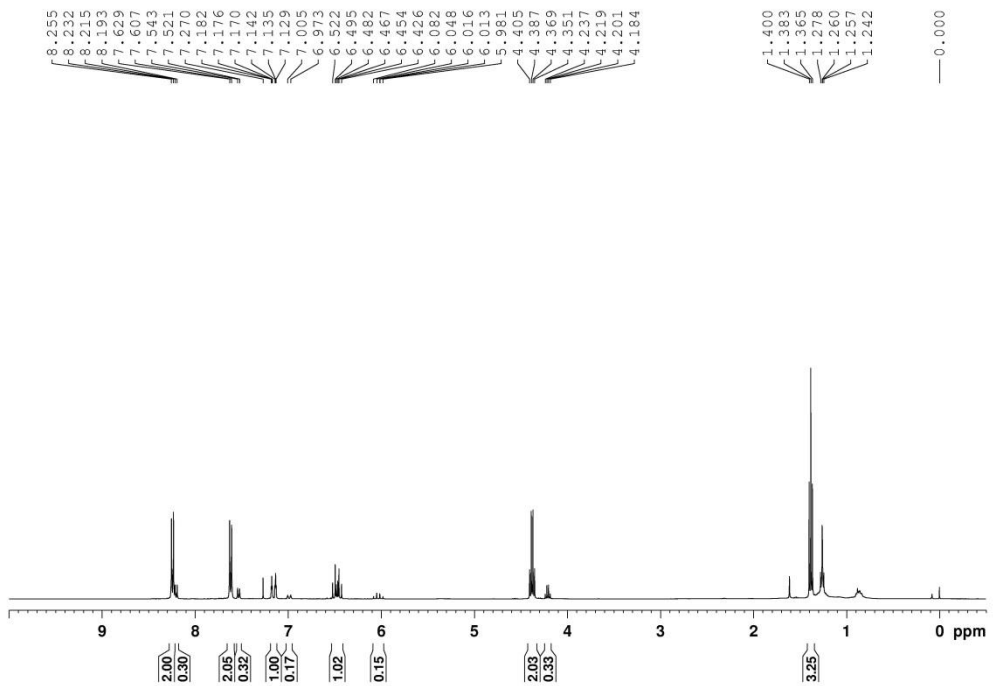



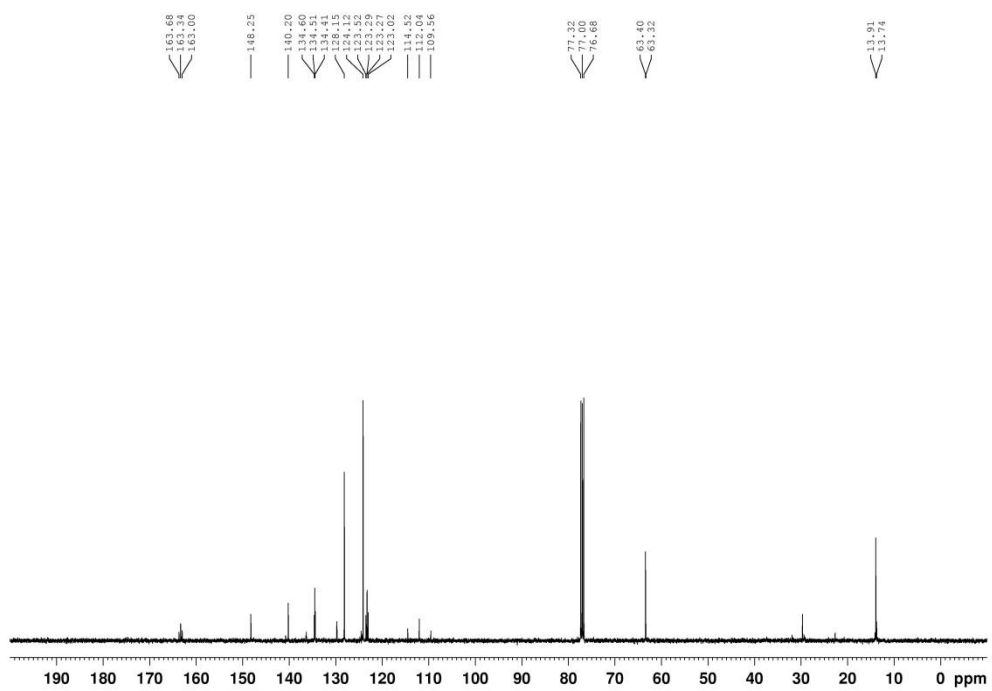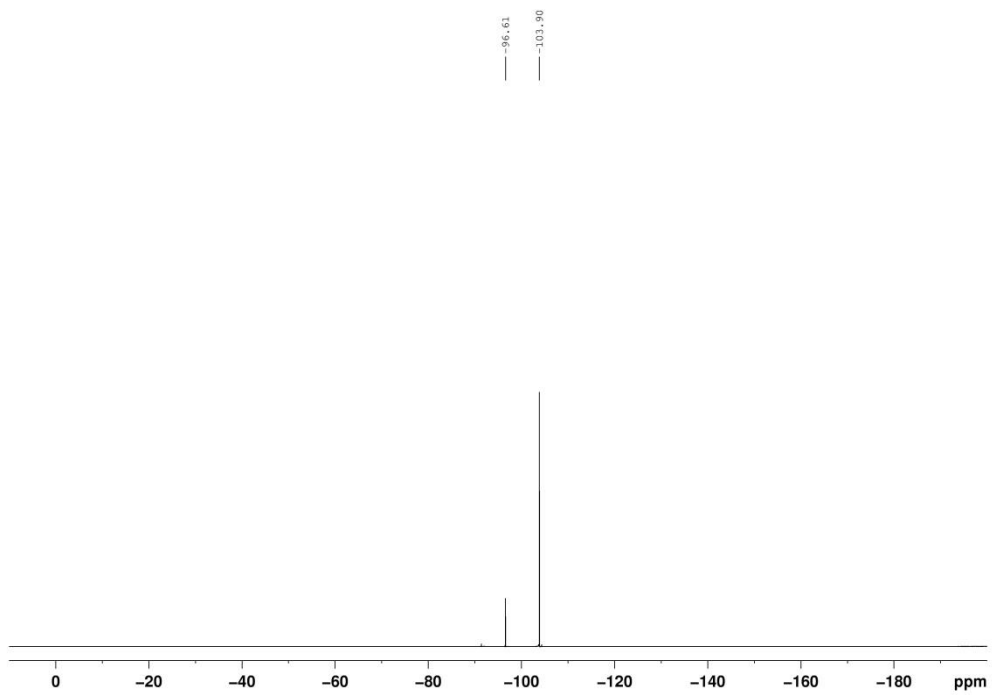

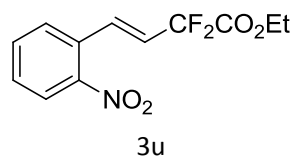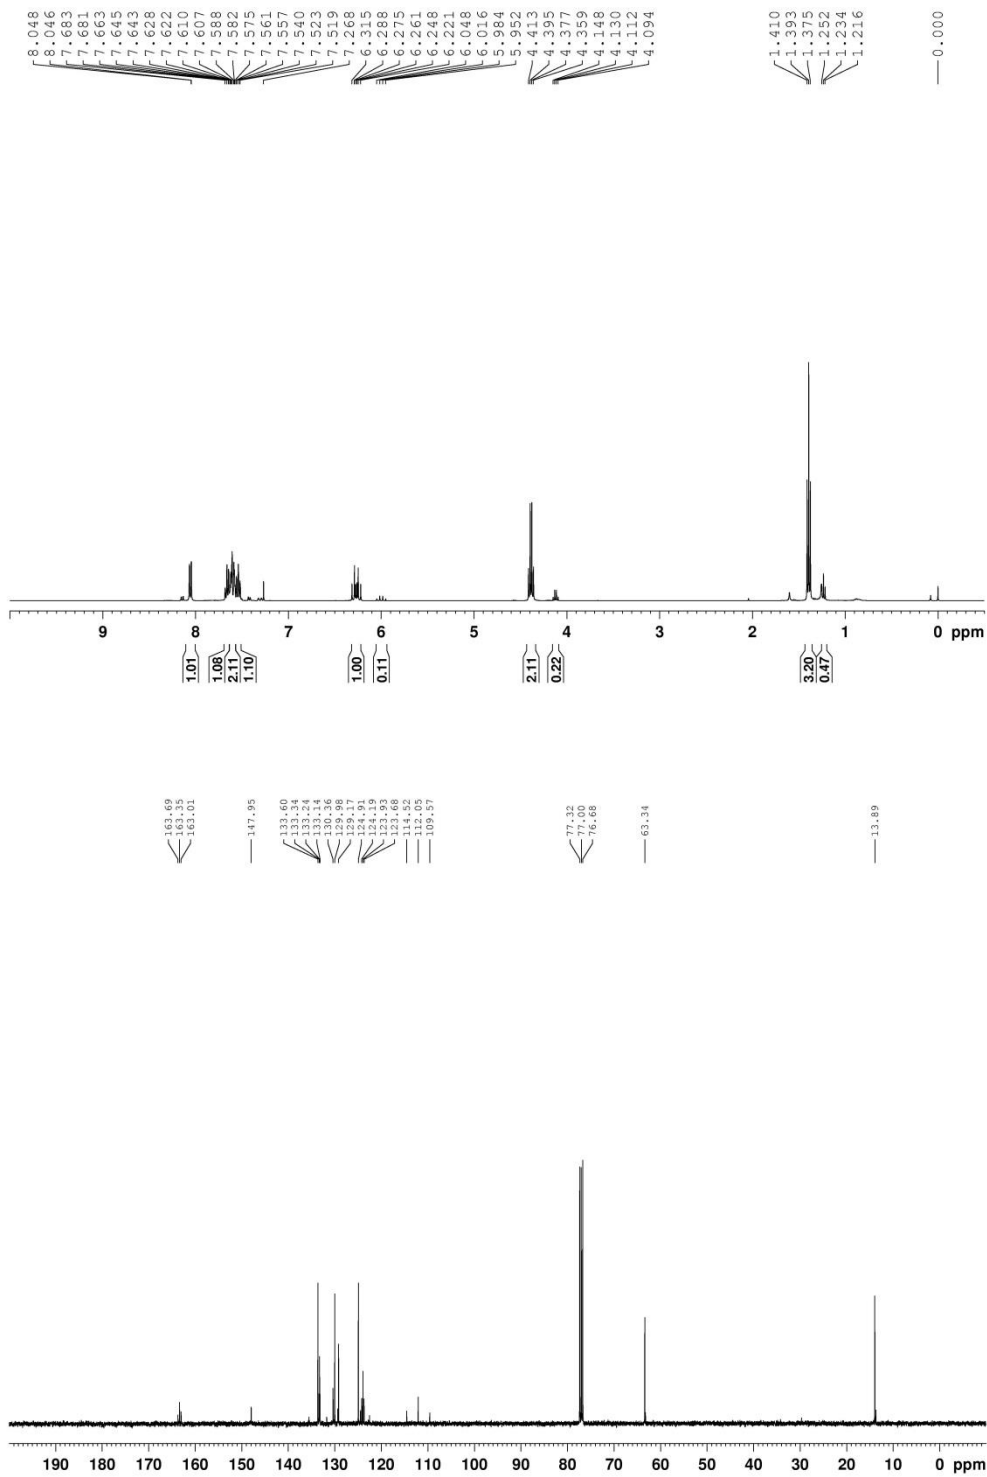

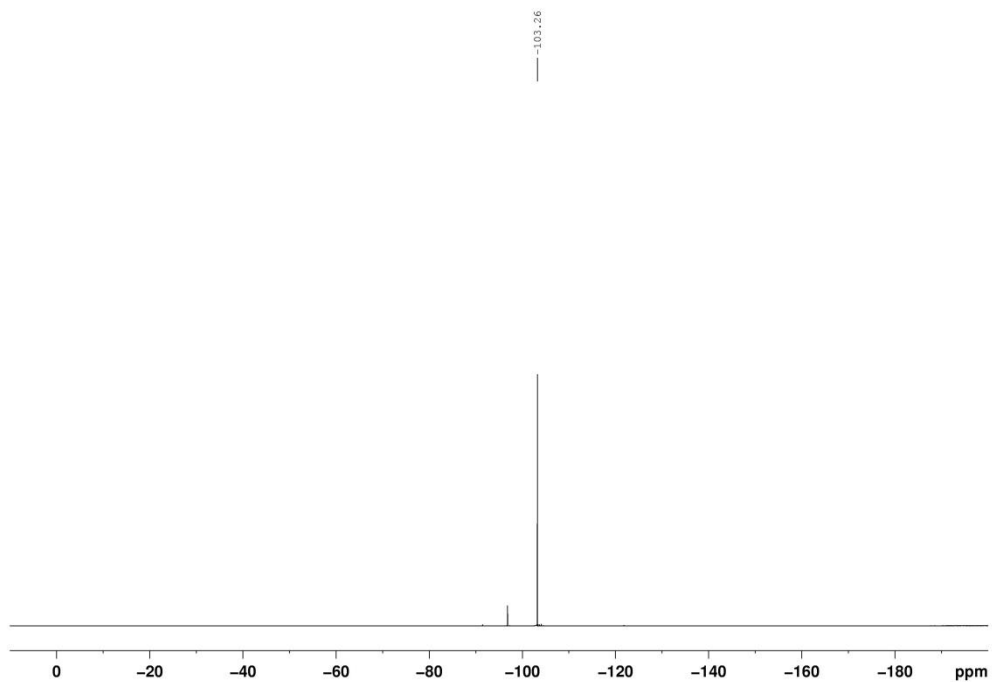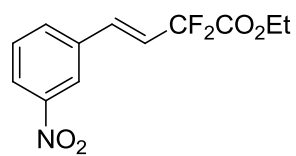

3v

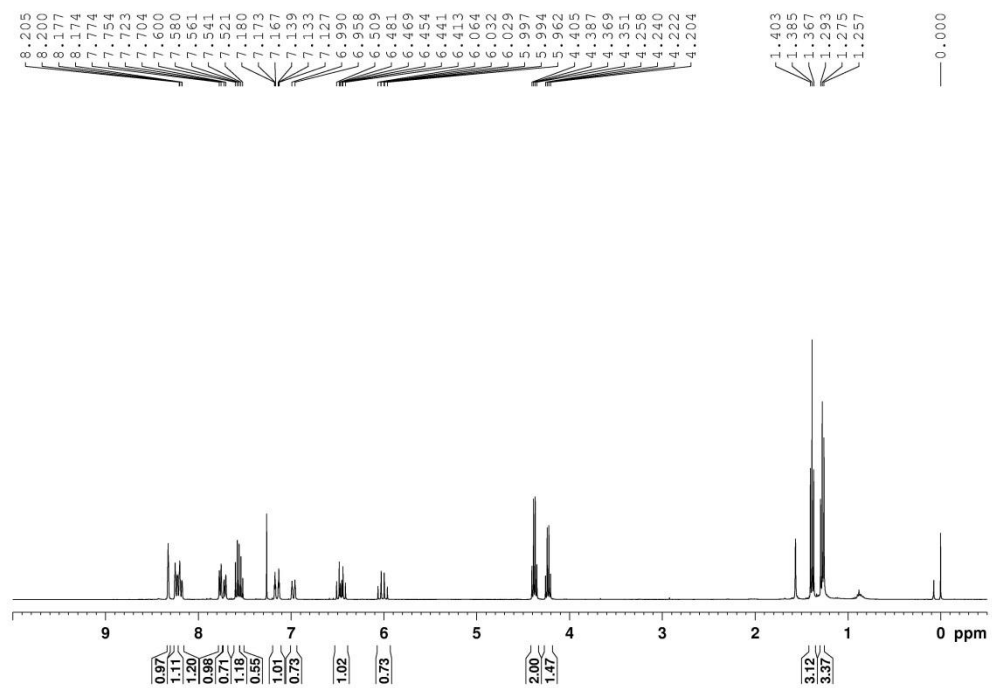

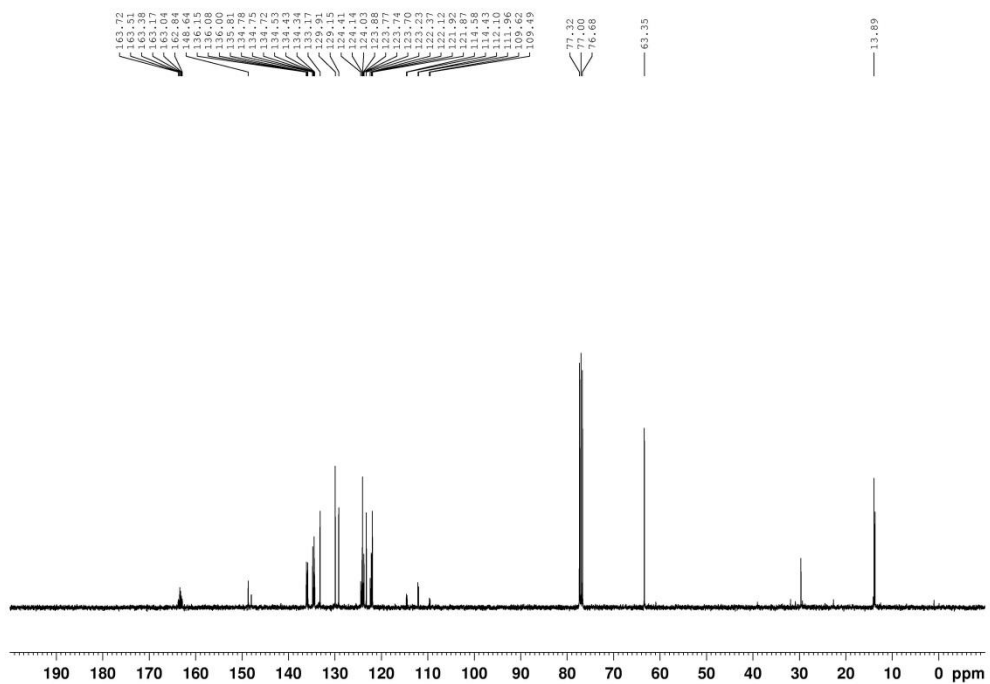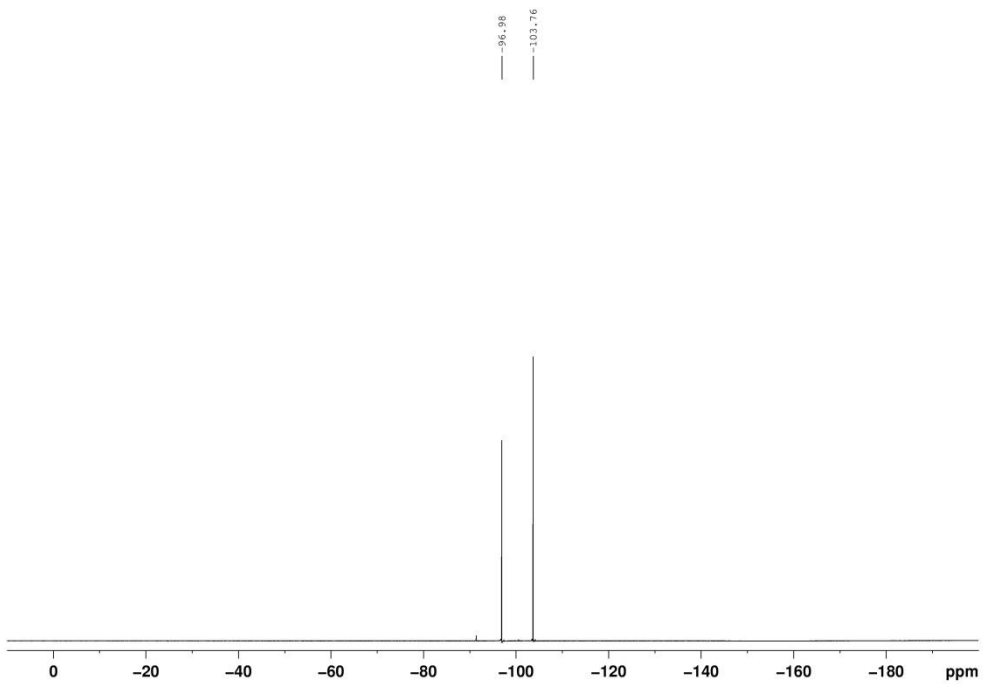

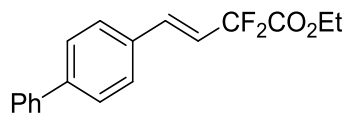

3w

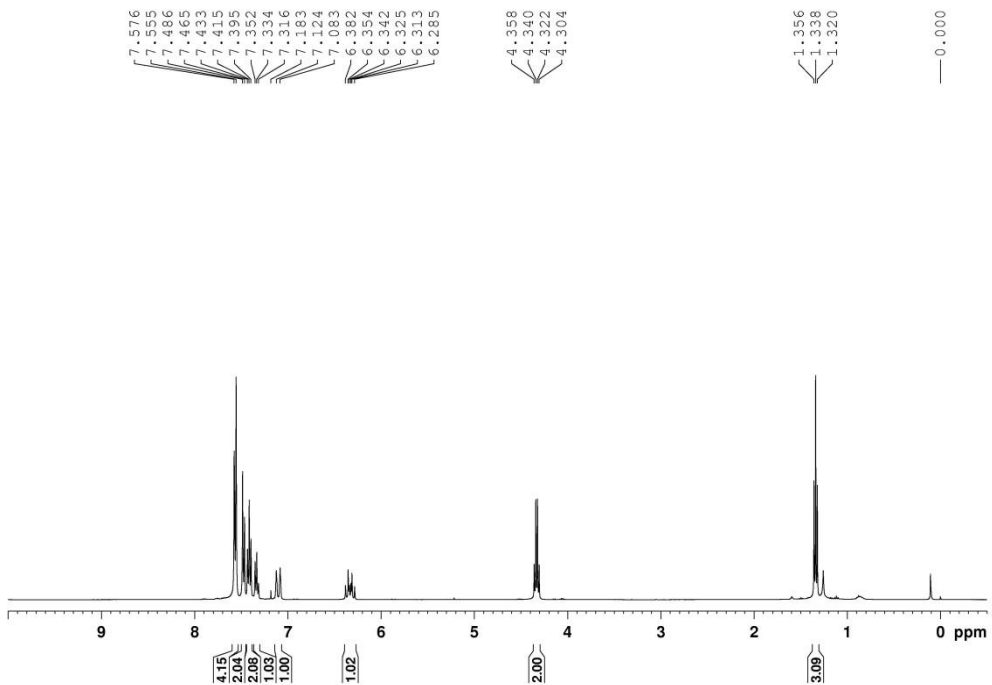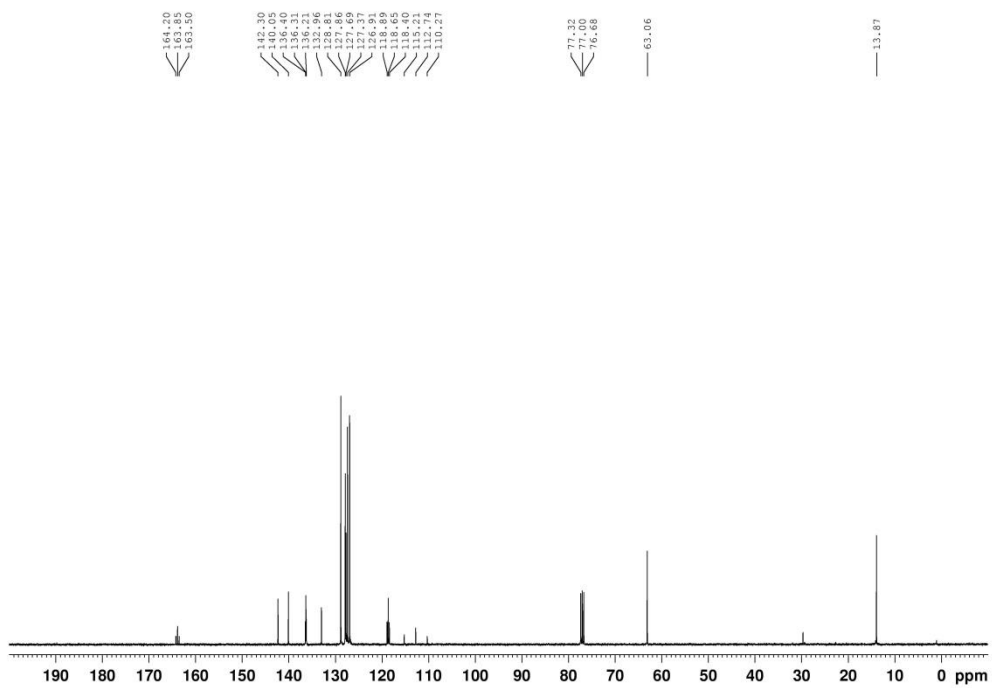

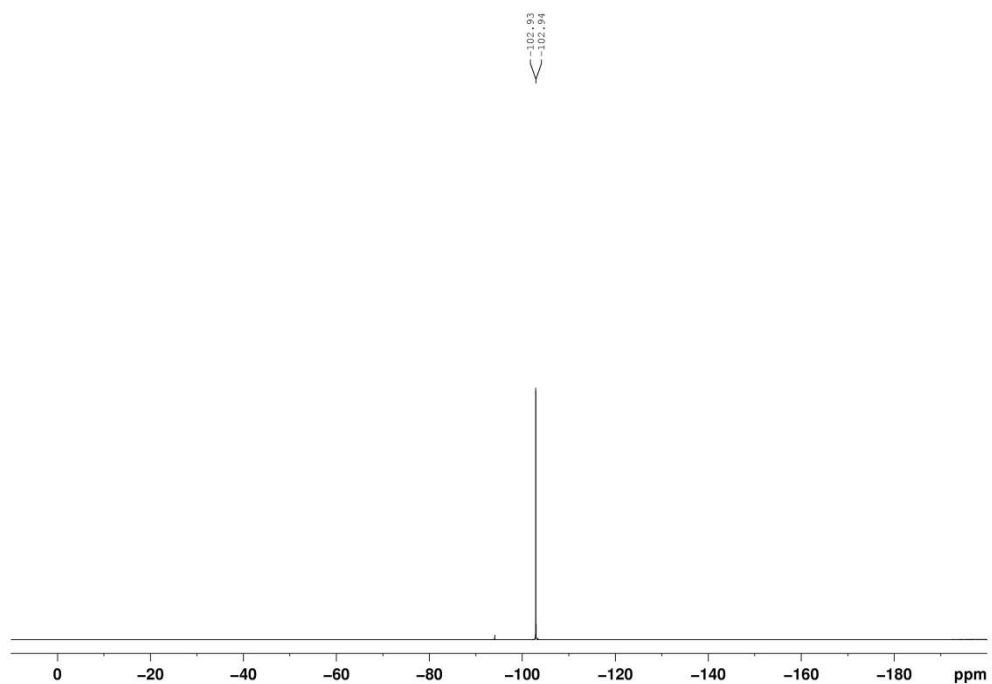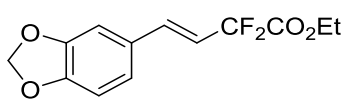

3x

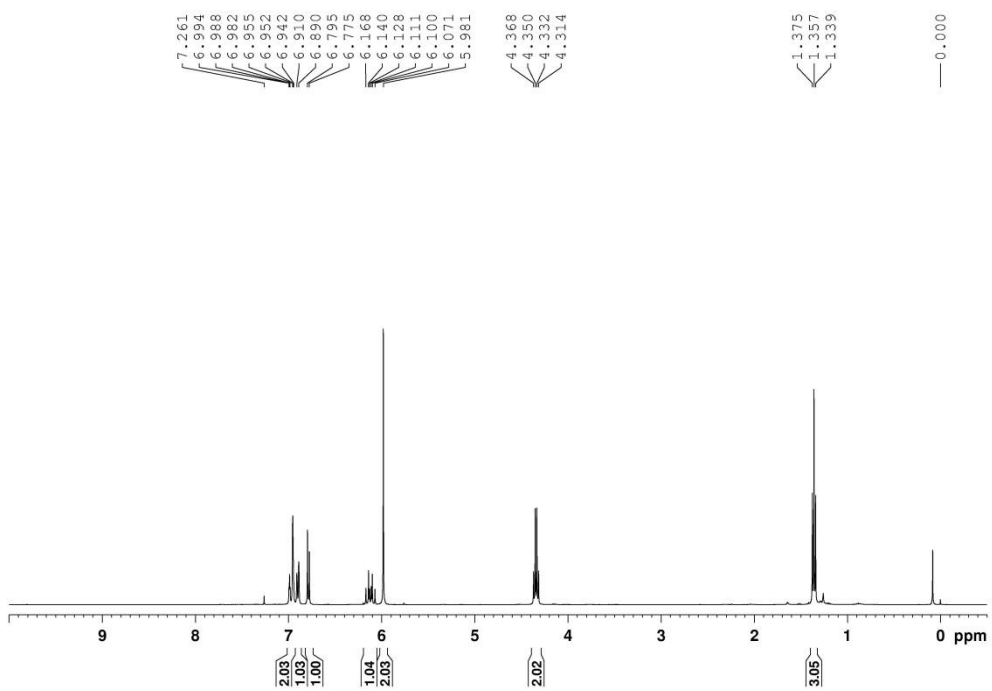

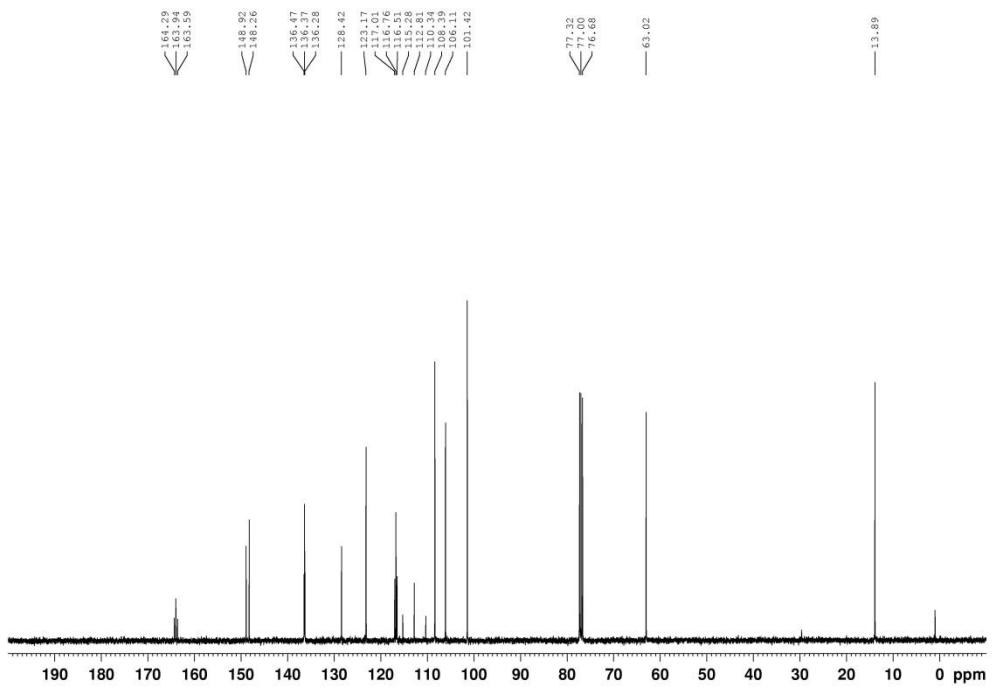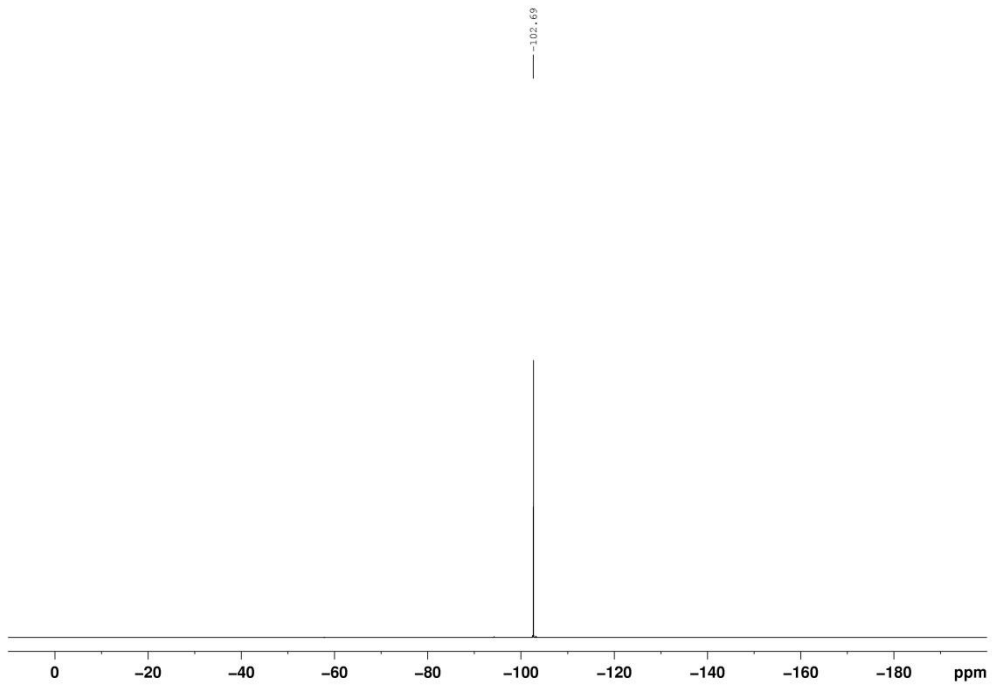

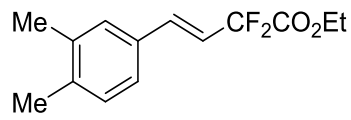

3y

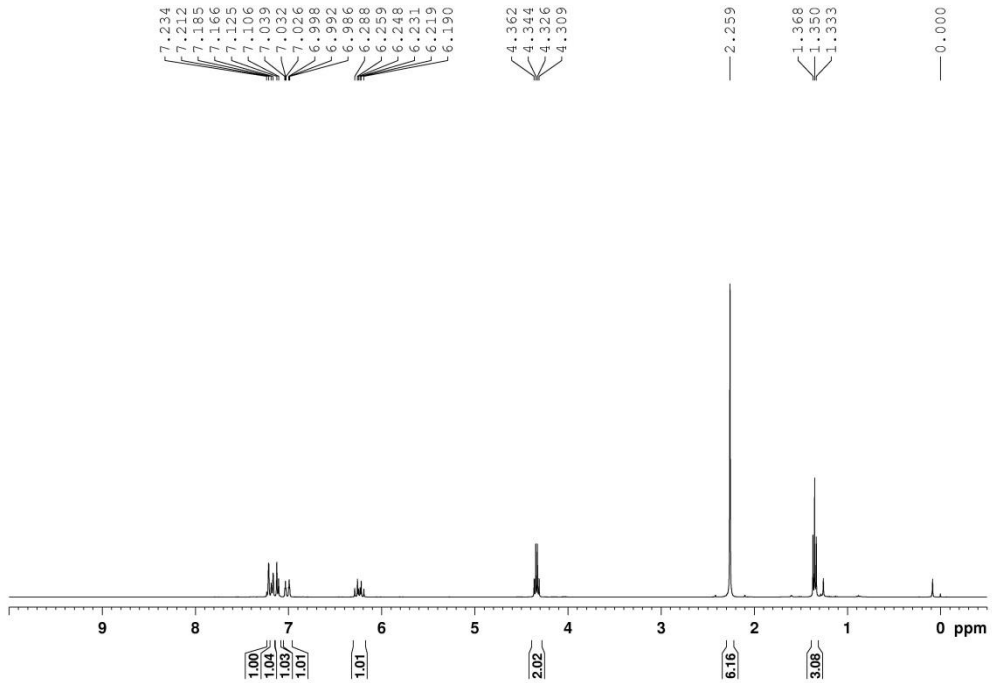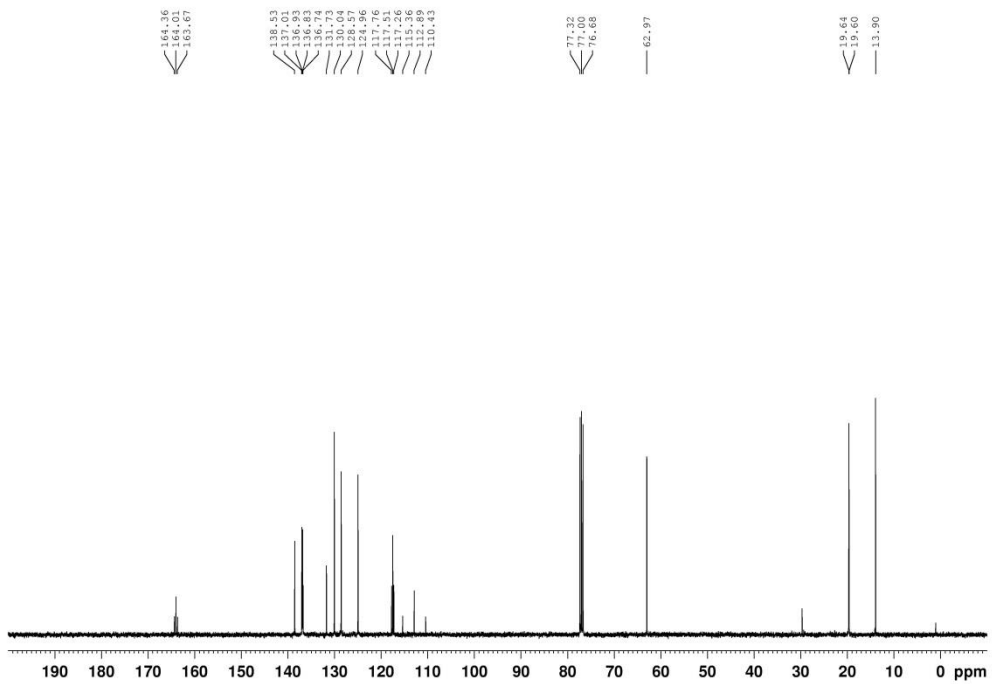



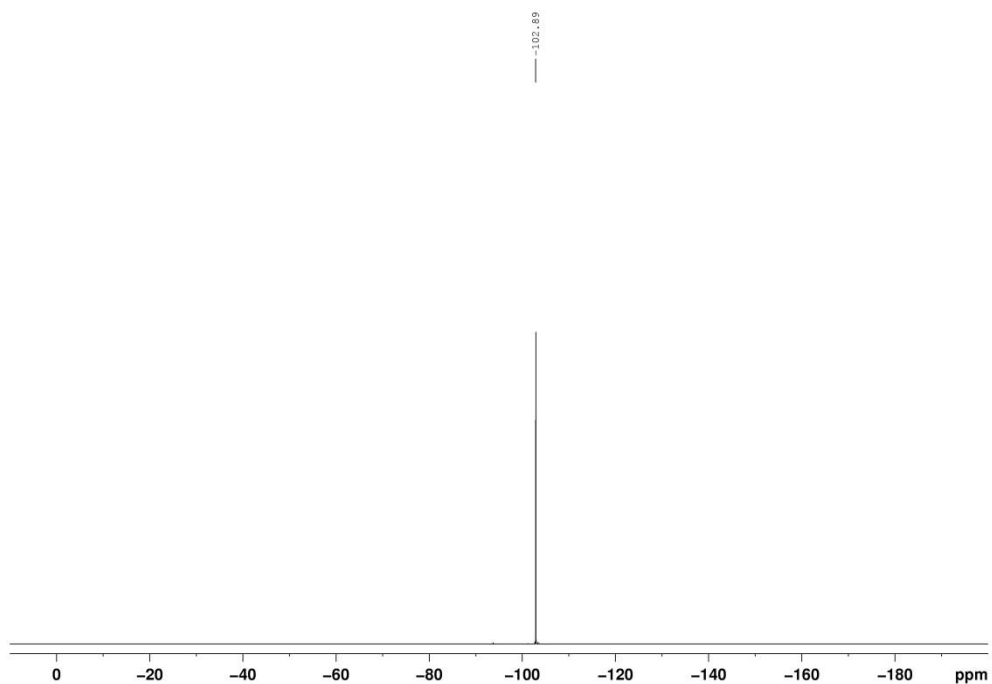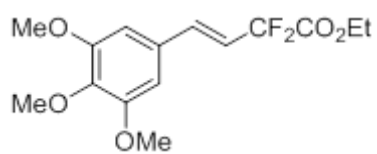

3z

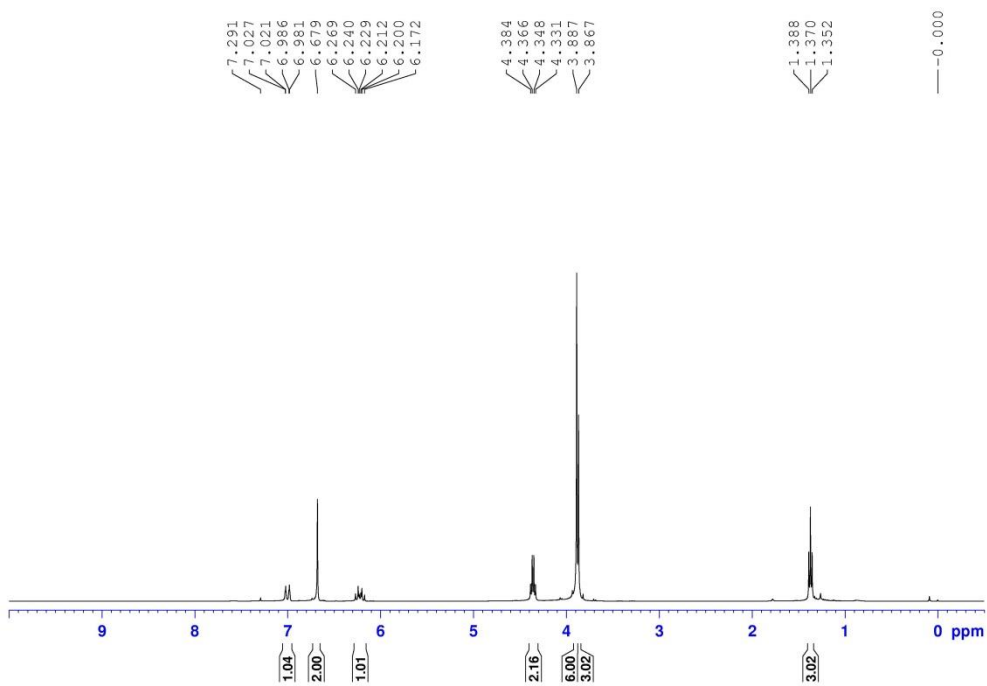

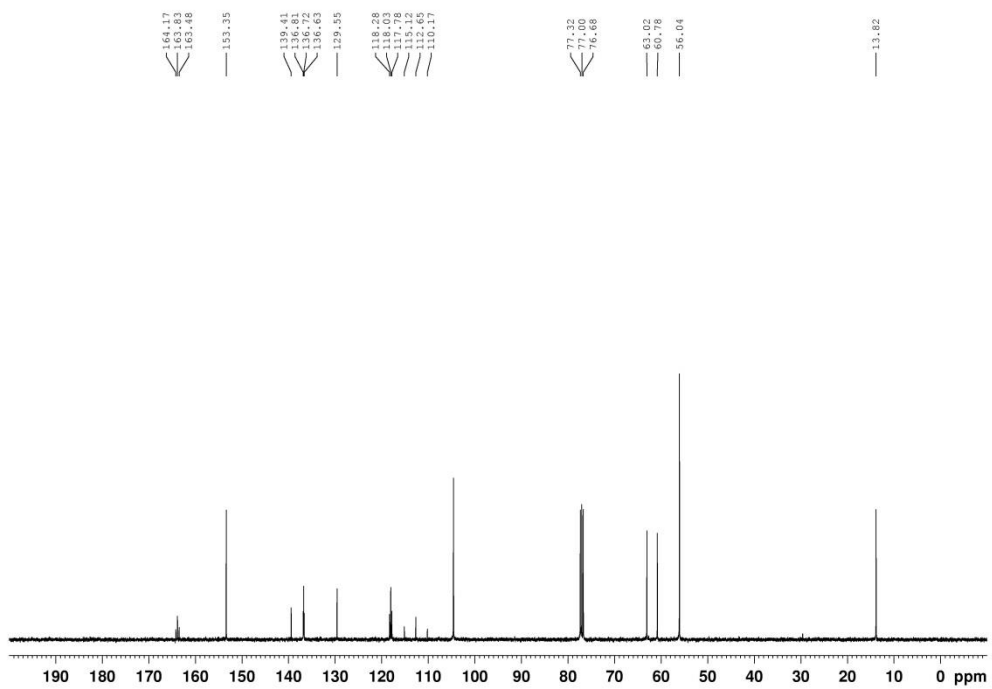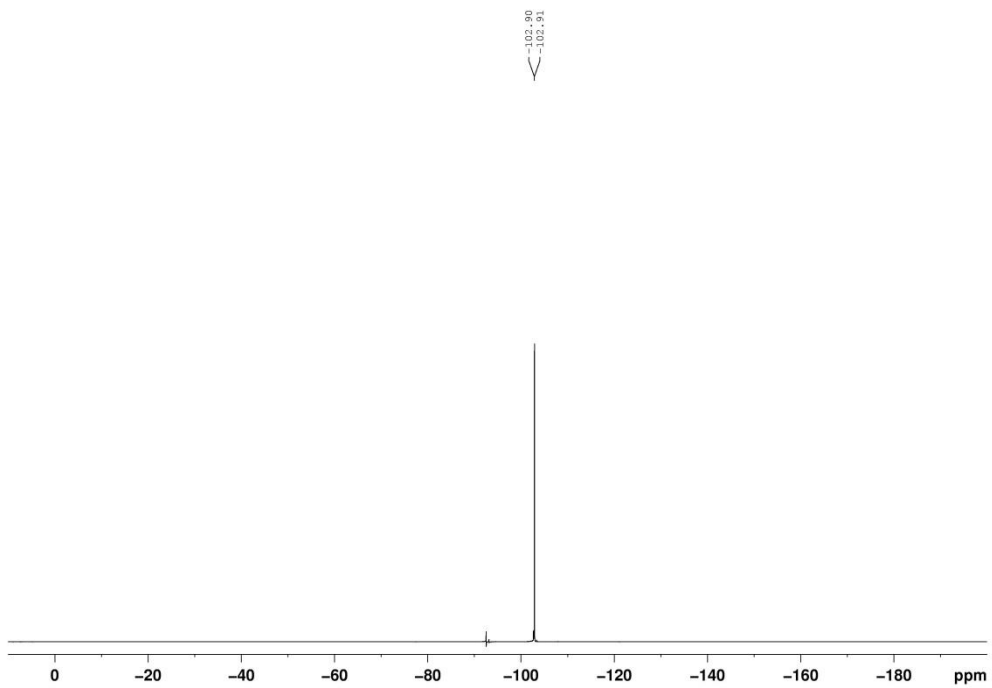

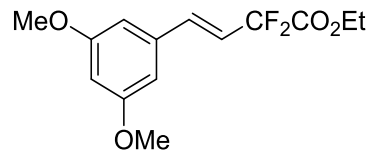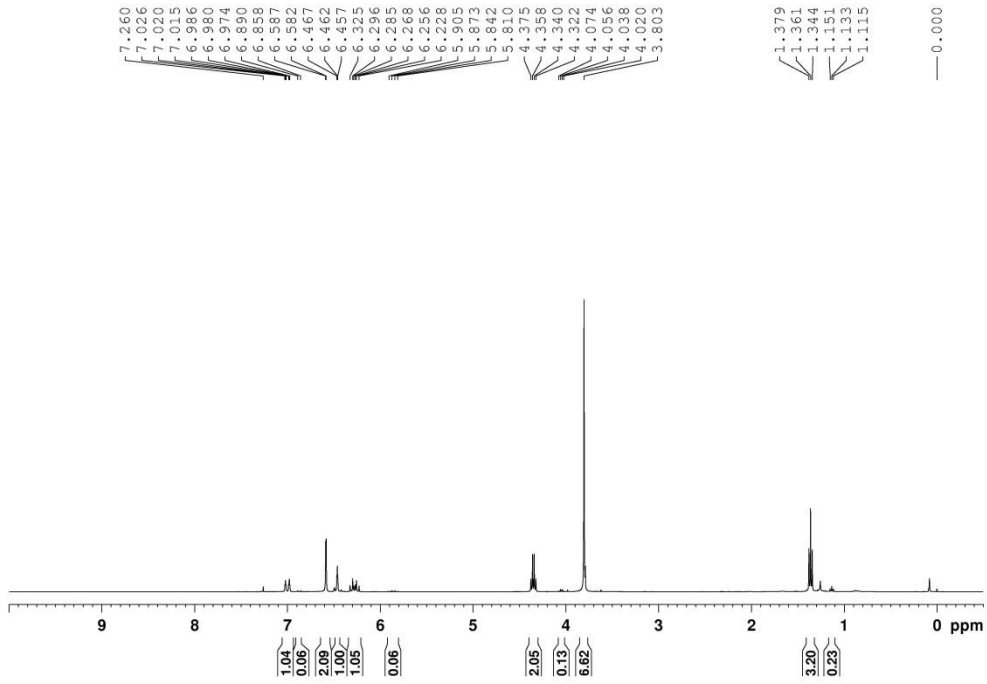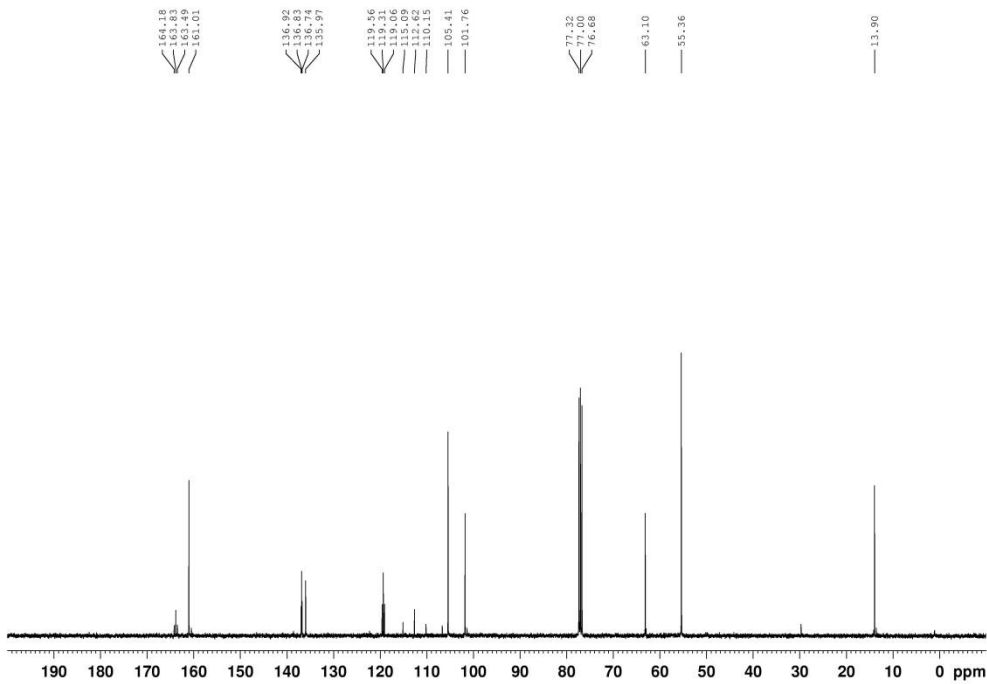

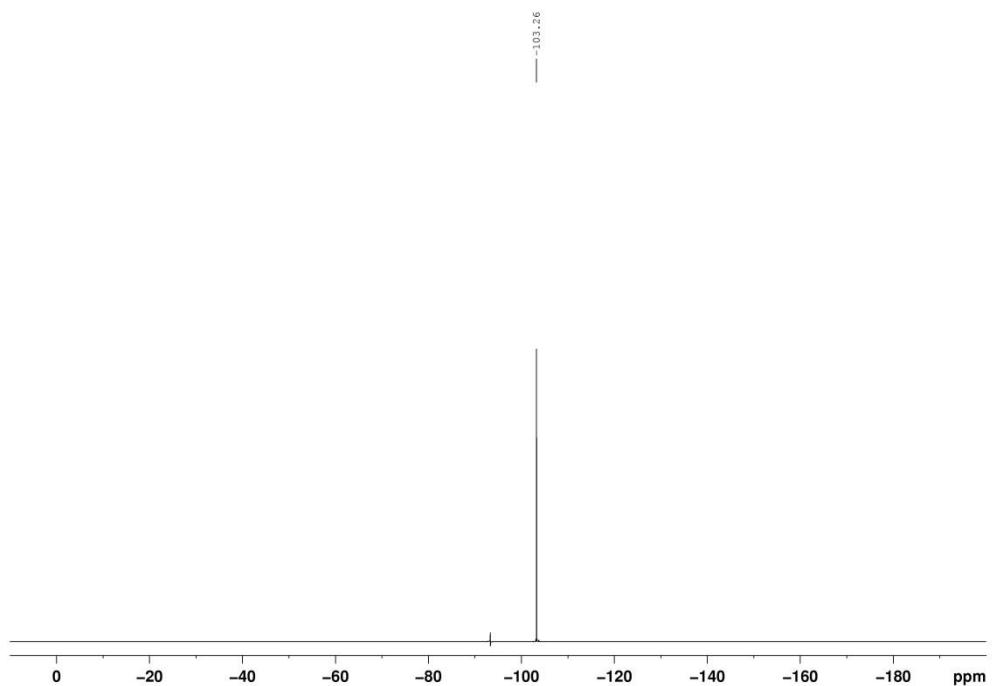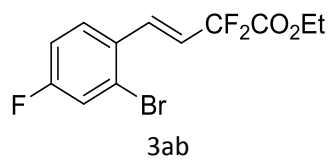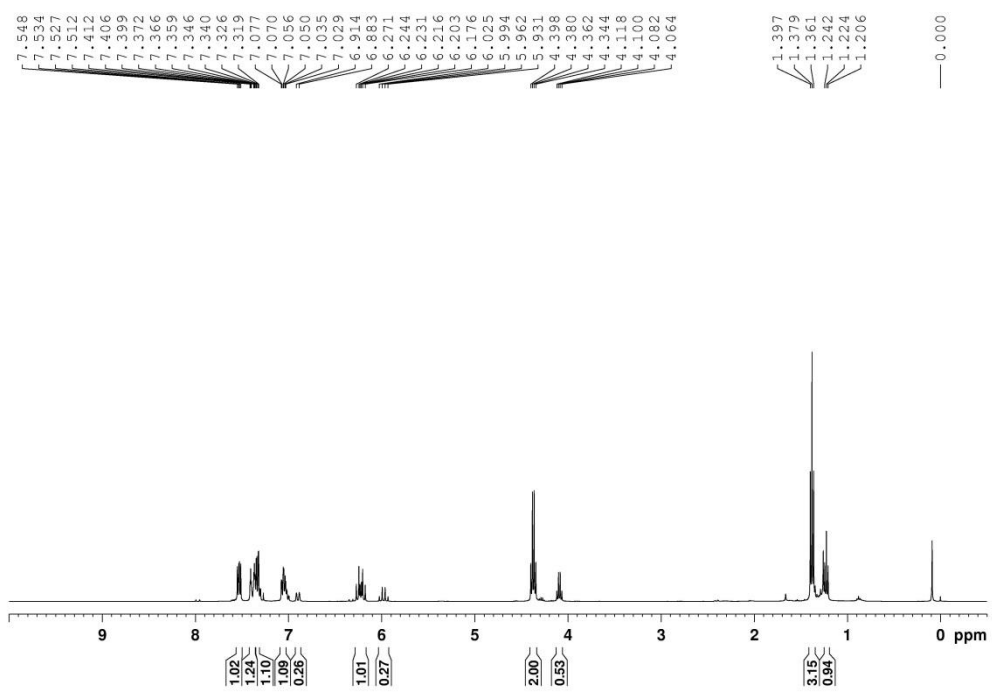

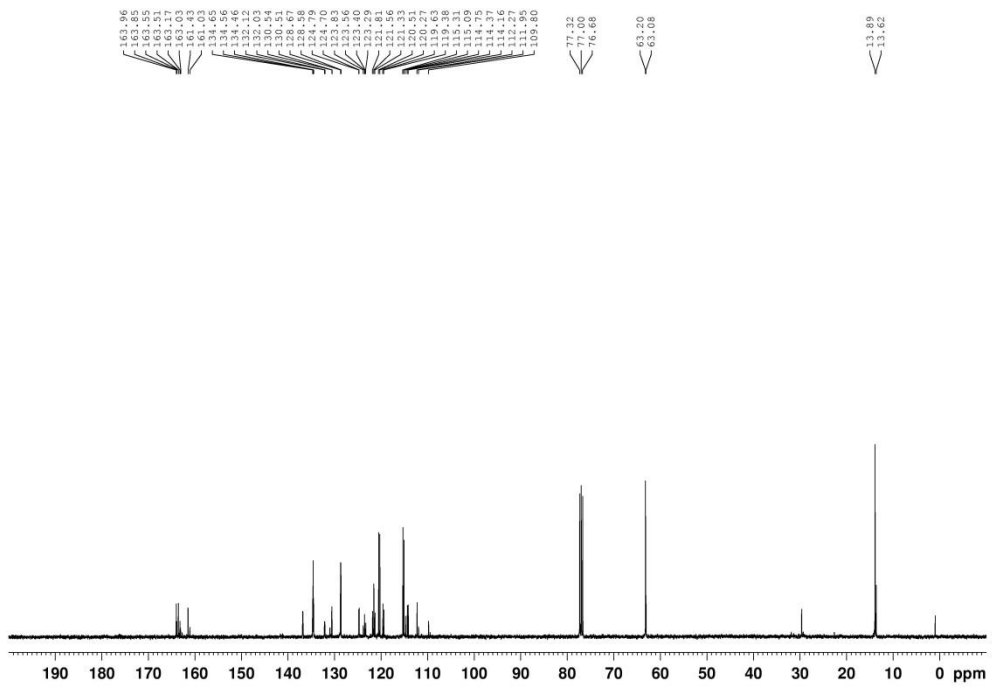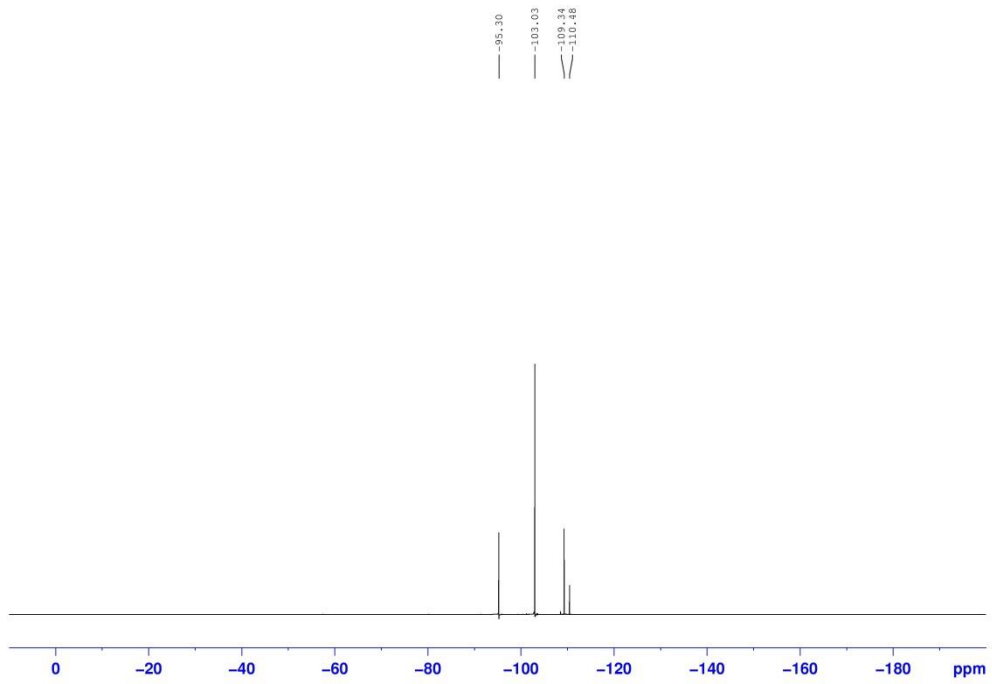

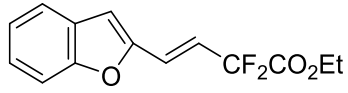

3ac

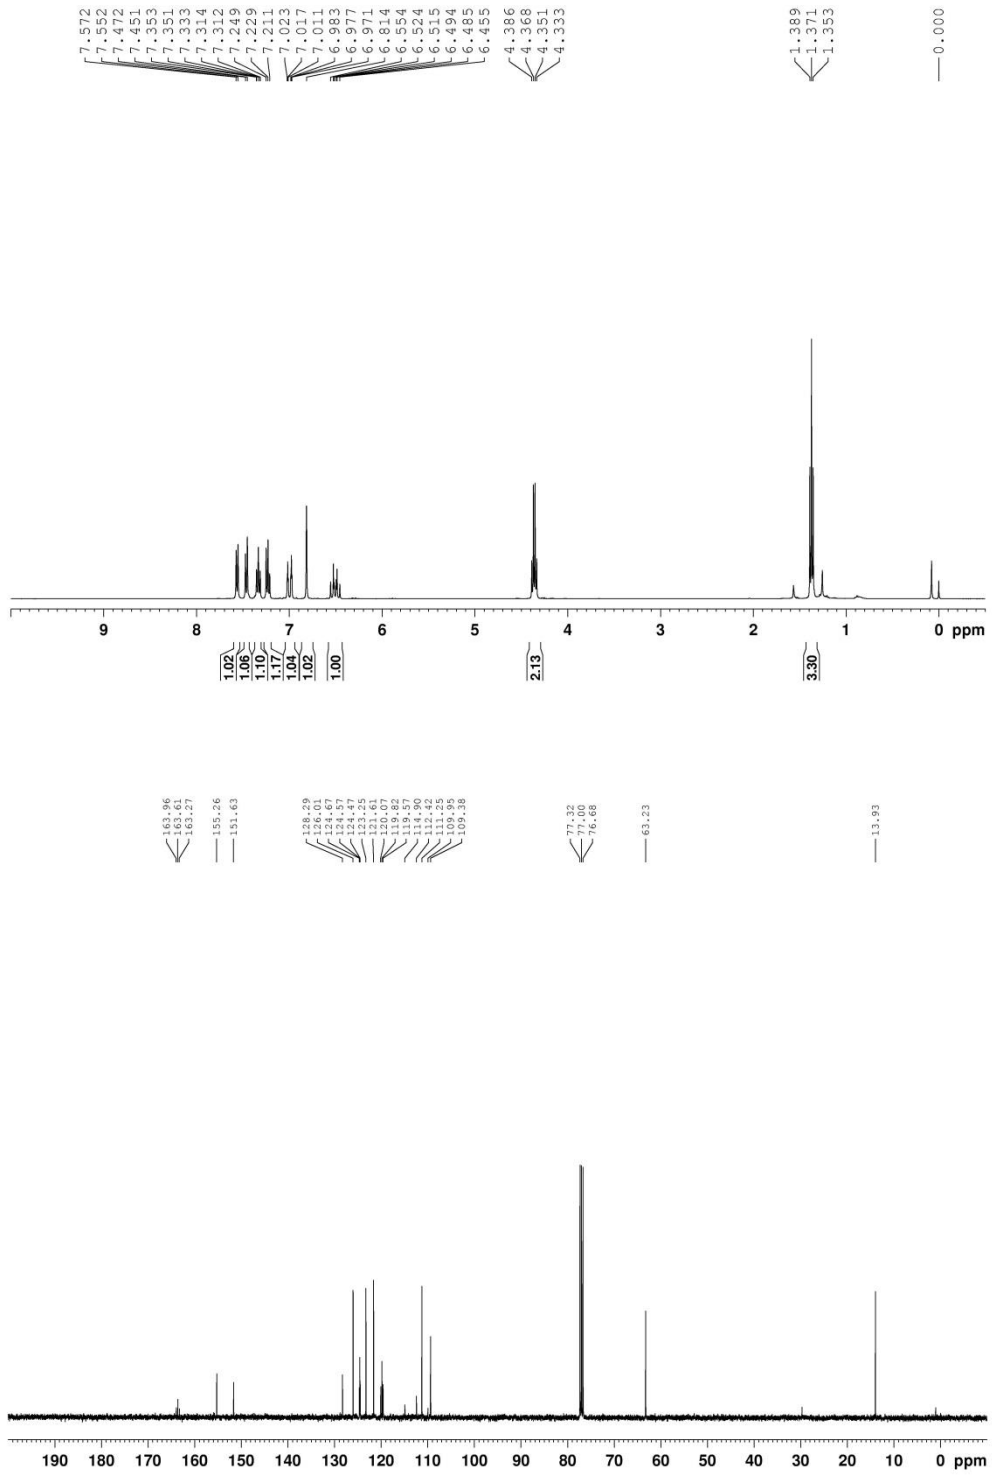

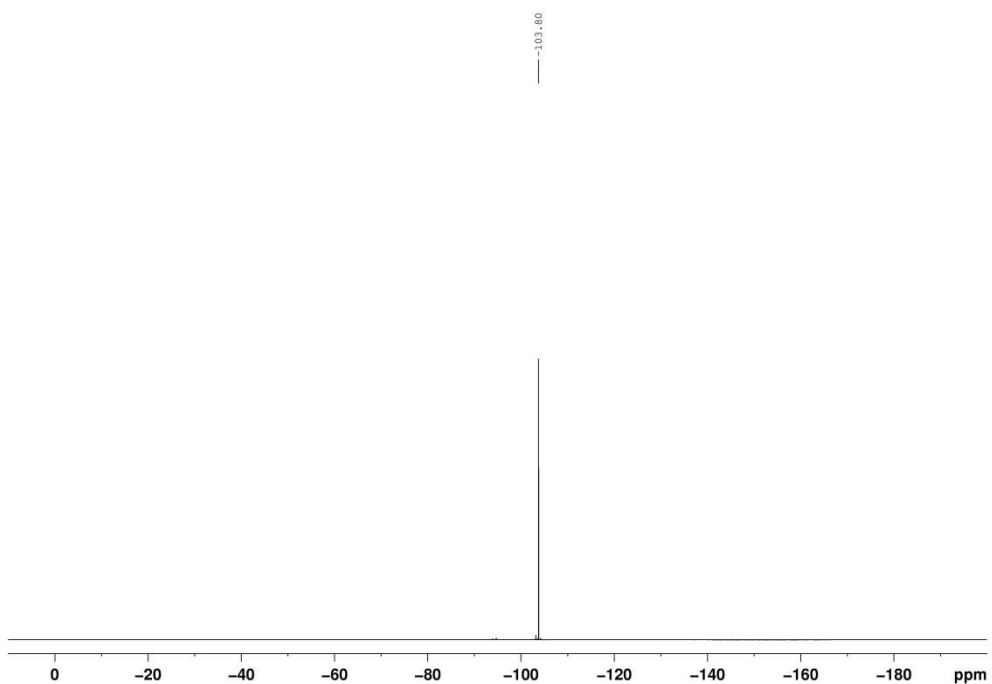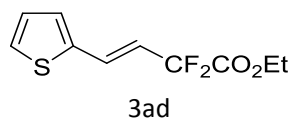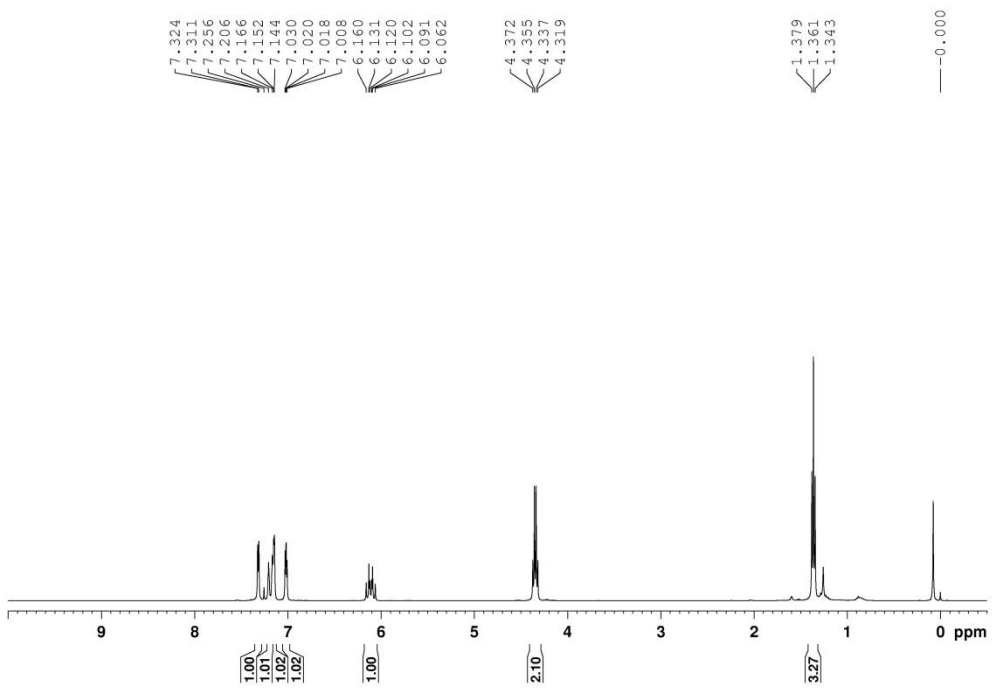

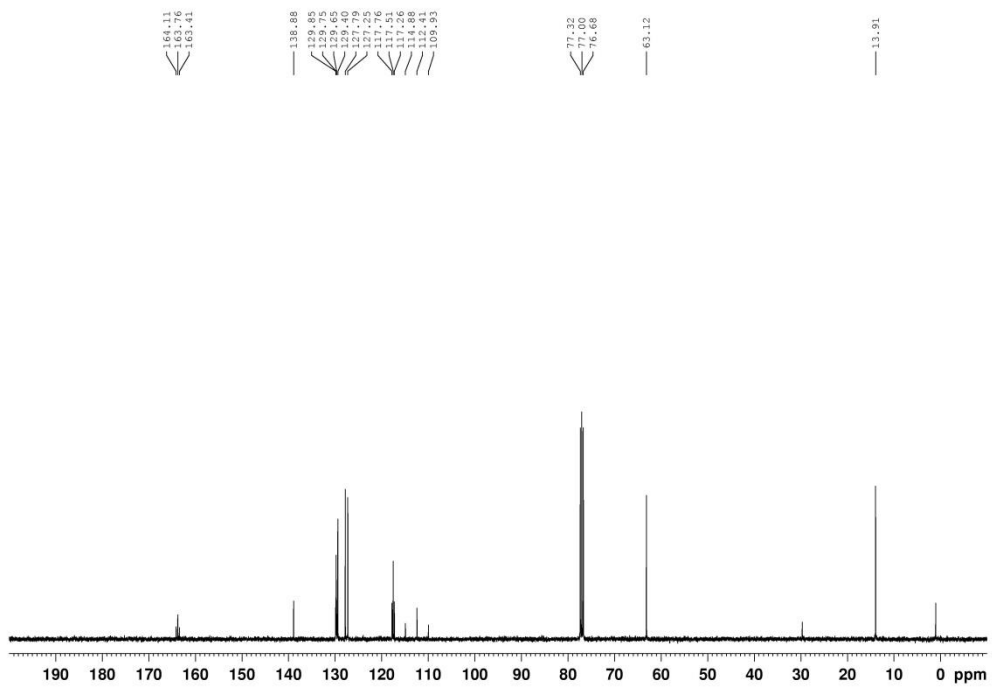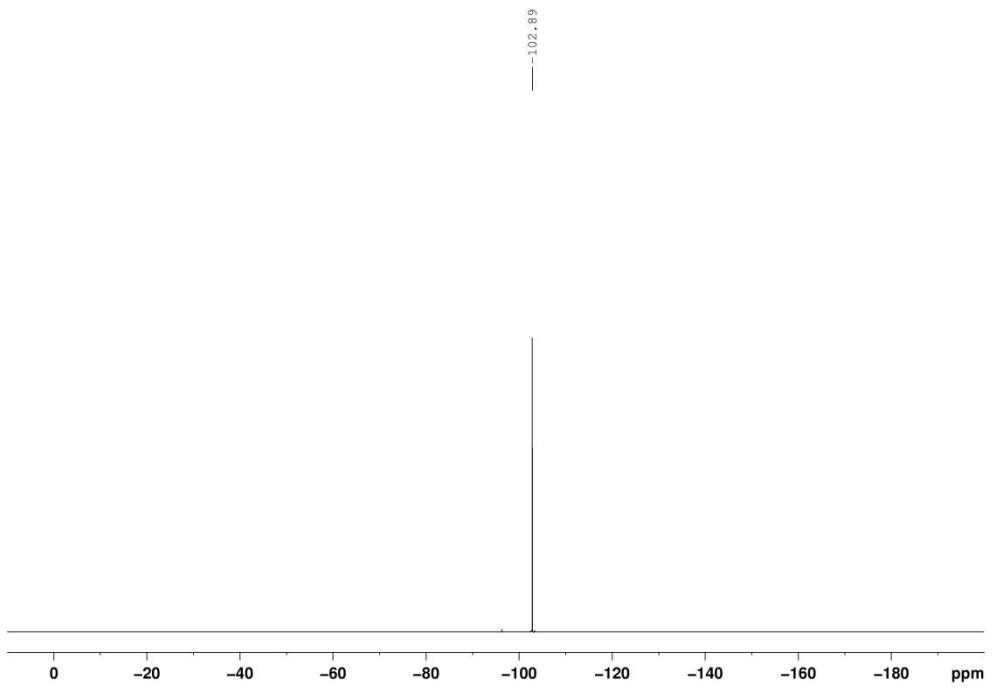



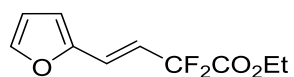

3ae

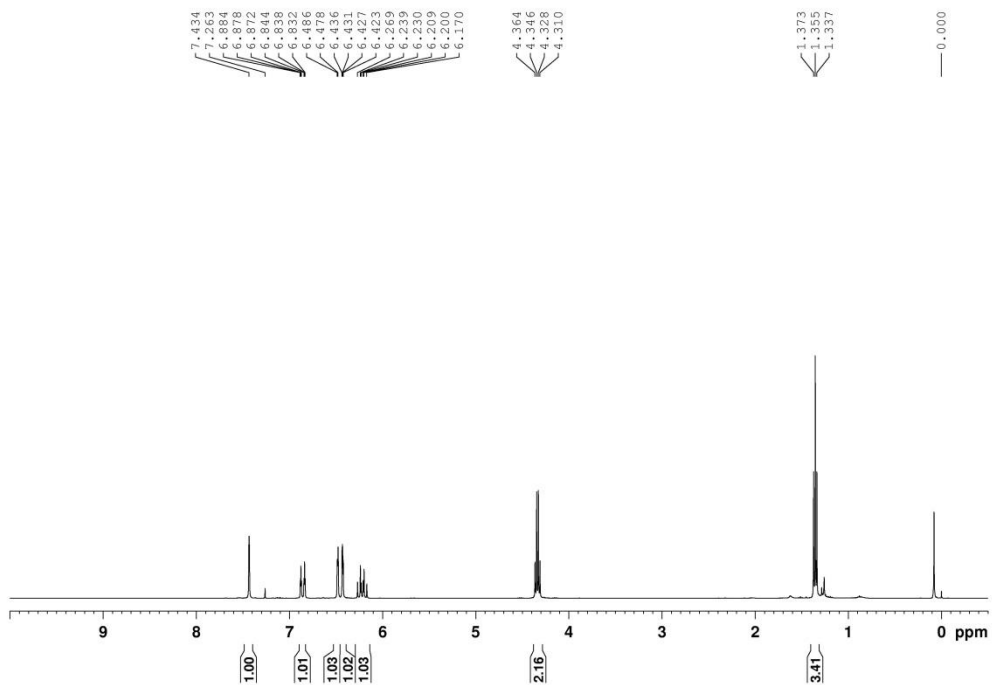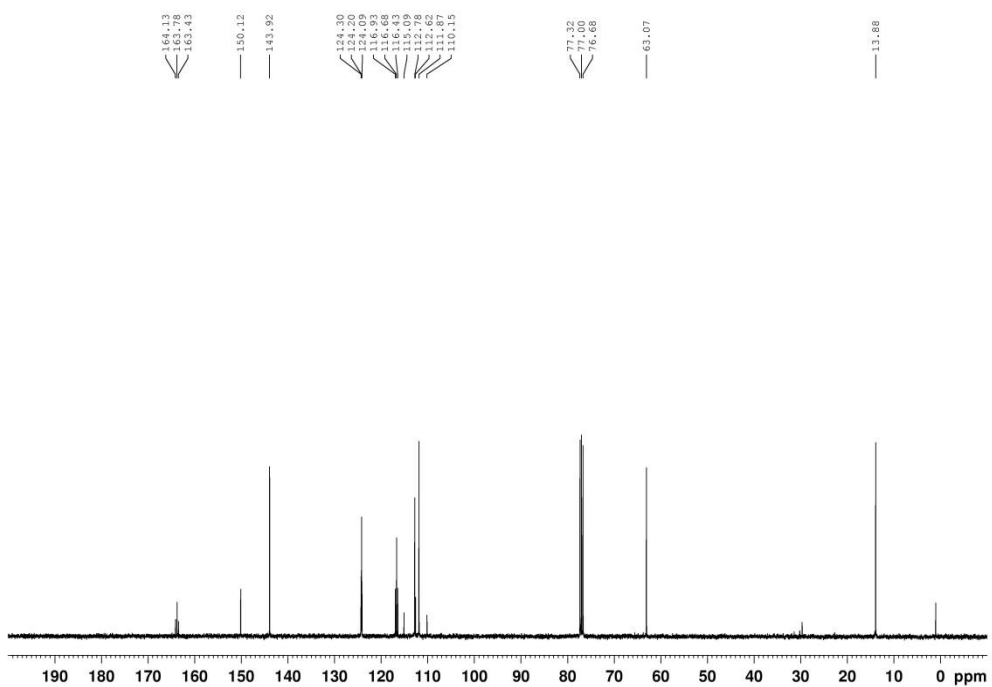

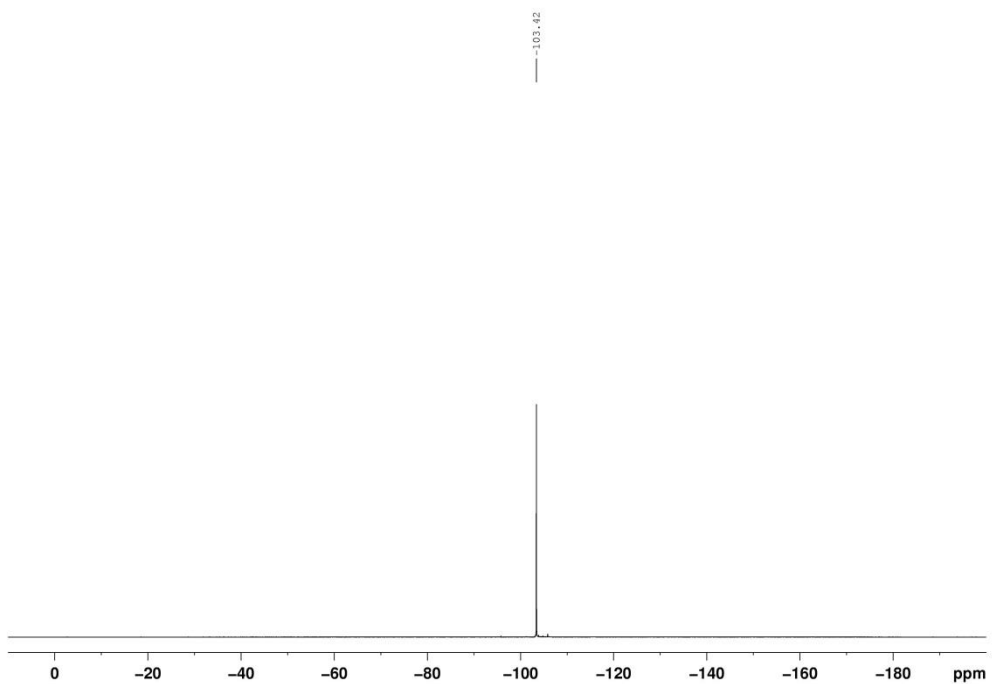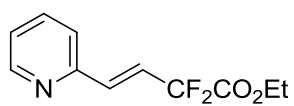

3af

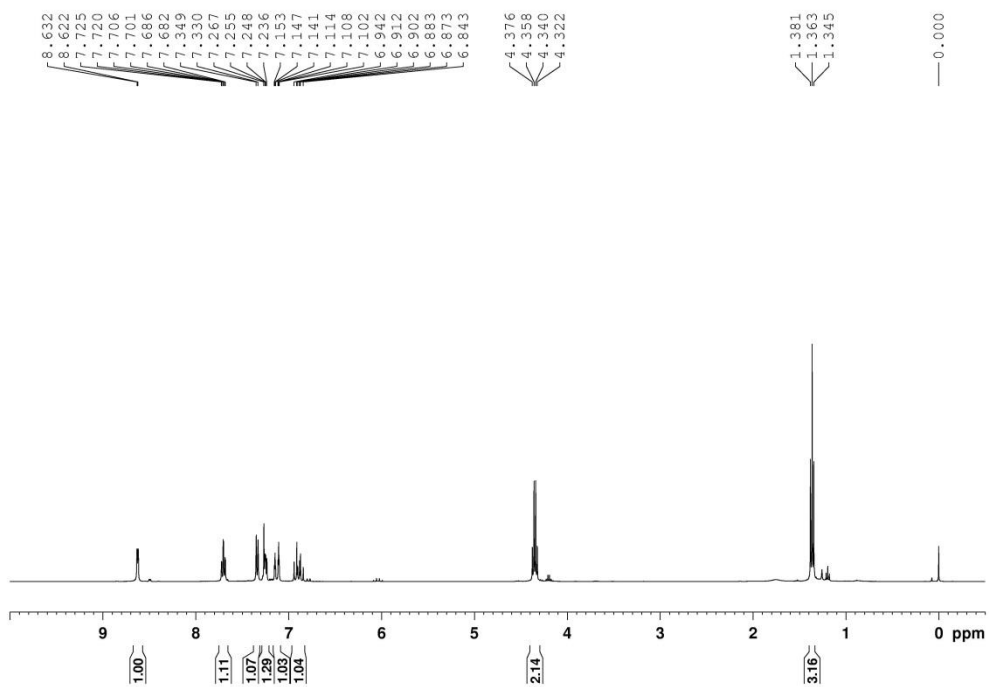

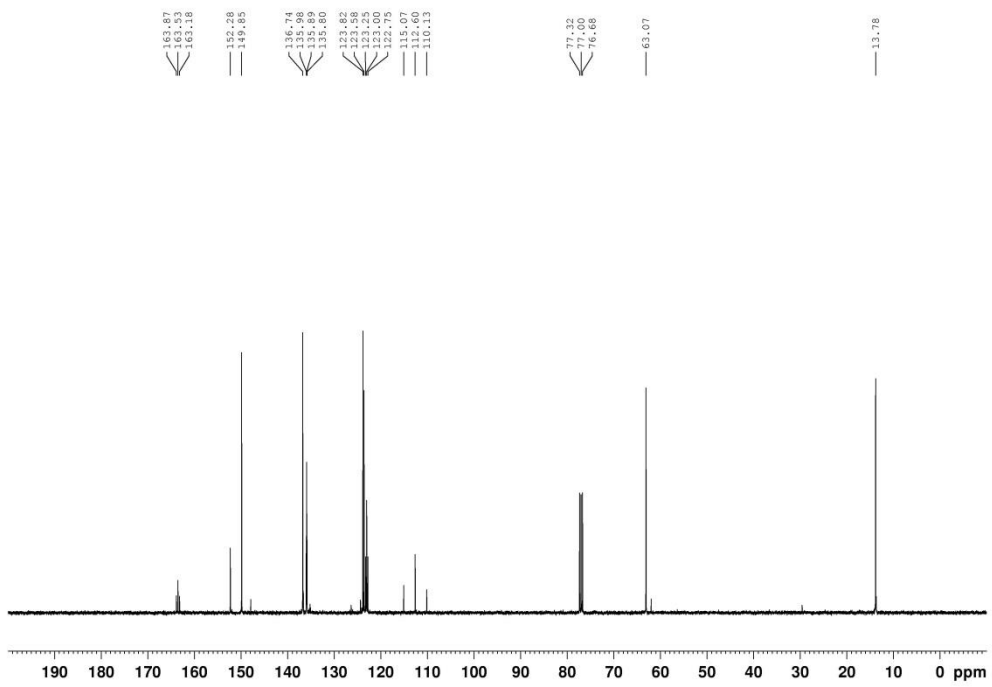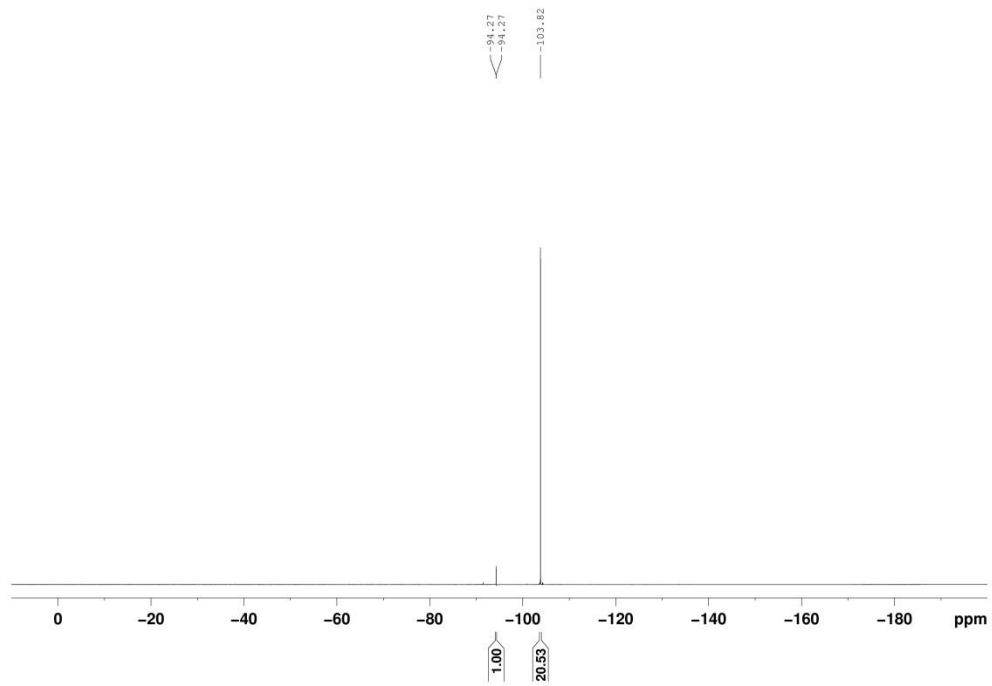

Supplement: c6cc06284a1.pdf [file c6cc06284a1.pdf]
